# Supplementary material for: Genomic epidemiology of SARS-CoV-2 variants during the first two years of the pandemic in Colombia
Source: PubMed Central journal article supplement (PMC10344885; doi:10.1038/s43856-023-00328-3), 2023-07-13
Supplement: 43856_2023_328_MOESM2_ESM.pdf [file 43856_2023_328_MOESM2_ESM.pdf]

## **Description of Additional Supplementary Files**

**File name:** Supplementary Data 1

**Description:** Acknowledgment to the Authors and Laboratories. The following authors and laboratories are acknowledged for originating and submitting the SARS-CoV-2 genomes to GISAID, which were used as available sequences in this study.

**File name:** Supplementary Data 2

**Description:** Supplementary table that provides the access numbers of the novel SARS-CoV-2 sequences obtained from Colombia, which were included in this study. The current status is reported until June 2022. A total of 228 genome sequences were used in this study, with 124 genomes sequenced specifically for this research and 104 genomes downloaded from GISAID. The genomes with a sample collection date within the same time frame as the social protest are highlighted in gray.
