# Supplementary material for: Genomic epidemiology of SARS-CoV-2 variants during the first two years of the pandemic in Colombia
Source: PubMed Central journal article supplement (PMC10344885; doi:10.1038/s43856-023-00328-3), 2023-07-13
Supplement: 43856_2023_328_MOESM3_ESM.pdf [file 43856_2023_328_MOESM3_ESM.pdf]

|                                                                                                                                                                                                                                                                                                                                                                                                                                                                                                                                                                                                                                                                                                                                                                                                                                                                                                                                                                                |                                                                                                                                                    |                                                                                                                                                                                                                                                        |                                                                                                                                                                                                                                                                                                                                                                                                                                                                                   |
|--------------------------------------------------------------------------------------------------------------------------------------------------------------------------------------------------------------------------------------------------------------------------------------------------------------------------------------------------------------------------------------------------------------------------------------------------------------------------------------------------------------------------------------------------------------------------------------------------------------------------------------------------------------------------------------------------------------------------------------------------------------------------------------------------------------------------------------------------------------------------------------------------------------------------------------------------------------------------------|----------------------------------------------------------------------------------------------------------------------------------------------------|--------------------------------------------------------------------------------------------------------------------------------------------------------------------------------------------------------------------------------------------------------|-----------------------------------------------------------------------------------------------------------------------------------------------------------------------------------------------------------------------------------------------------------------------------------------------------------------------------------------------------------------------------------------------------------------------------------------------------------------------------------|
|                                                                                                                                                                                                                                                                                                                                                                                                                                                                                                                                                                                                                                                                                                                                                                                                                                                                                                                                                                                |                                                                                                                                                    |                                                                                                                                                                                                                                                        | Martinez; Julian Naizaque; Katherine Laiton-Donato; Lisseth Pardo; Magdalena Wiesner; Marcela Mercado-Reyes; Maria T. Herrera-Sepúlveda; Marta Lopez Blanco; Martha Lucia Ospina Martinez; Paola Rojas; Sergio Gomez; Sheryll Corchuelo; Ángela Alarcon Cruz                                                                                                                                                                                                                      |
| EPI_ISL_906540, EPI_ISL_906544                                                                                                                                                                                                                                                                                                                                                                                                                                                                                                                                                                                                                                                                                                                                                                                                                                                                                                                                                 | CLINICA DE OCCIDENTE                                                                                                                               | Instituto Nacional de Salud- Dirección de Investigación en Salud Pública, Universidad de los Andes- Applied genomics research group, Vicerrectoría de Investigación y Creación, Universidad de los Andes- Systems and Computing Engineering Department | Carlos Franco-Muñoz; Diego A. Álvarez-Díaz; Diego Andrés Prada; Gerardo Santamaría; Jorge Duitama; Héctor Alejandro Ruiz-Moreno; Jhonattan Reales-González; Jorge Ivan Díaz; Julian Naizaque; Katherine Laiton-Donato; Laura Natalia Gonzalez; Magdalena Wiesner; Marcela Mercado-Reyes; Maria T. Herrera-Sepúlveda; Martha Lucia Ospina Martinez; Mauricio Pacheco-Montealegre; Sheryll Corchuelo; Silvia Restrepo-Restrepo                                                      |
| EPI_ISL_1632503, EPI_ISL_1820958                                                                                                                                                                                                                                                                                                                                                                                                                                                                                                                                                                                                                                                                                                                                                                                                                                                                                                                                               | CLINICA FARALLONES                                                                                                                                 | Instituto Nacional de Salud- Dirección de Investigación en Salud Pública                                                                                                                                                                               | Carlos Franco-Muñoz; Carmen Osorio; Christian Romero; Diana Malo; Diego A. Álvarez-Díaz; Diego Andrés Prada; Gerardo Santamaría; Hector Alejandro Ruiz-Moreno; Jhonattan Reales-González; Jorge Rivera; Juan Camilo Martinez; Julian Naizaque; Katherine Laiton-Donato; Lisseth Pardo; Magdalena Wiesner; Marcela Mercado-Reyes; Maria T. Herrera-Sepúlveda; Martha Lopez Blanco; Martha Lucia Ospina Martinez; Paola Rojas; Sergio Gomez; Sheryll Corchuelo; Ángela Alarcon Cruz |
| EPI_ISL_3459396, EPI_ISL_3459397                                                                                                                                                                                                                                                                                                                                                                                                                                                                                                                                                                                                                                                                                                                                                                                                                                                                                                                                               | CLINICA IBEROAMERICANA                                                                                                                             | Instituto Nacional de Salud                                                                                                                                                                                                                            | Carlos Franco-Muñoz; Carmen Osorio; Diana Malo; Diego A. Álvarez-Díaz; Diego Andrés Prada; Gerardo Santamaría; Hector Alejandro Ruiz-Moreno; Jhonattan Reales-González; Jorge Rivera; Juan Camilo Martinez; Julian Naizaque; Katherine Laiton-Donato; Lisseth Pardo; Magdalena Wiesner; Marcela Mercado-Reyes; Maria T. Herrera-Sepúlveda; Marta Lopez Blanco; Martha Lucia Ospina Martinez; Paola Rojas; Sergio Gomez; Sheryll Corchuelo; Ángela Alarcon Cruz                    |
| EPI_ISL_906536                                                                                                                                                                                                                                                                                                                                                                                                                                                                                                                                                                                                                                                                                                                                                                                                                                                                                                                                                                 | CLINICA OCCIDENTE                                                                                                                                  | Instituto Nacional de Salud- Dirección de Investigación en Salud Pública, Universidad de los Andes- Applied genomics research group, Vicerrectoría de Investigación y Creación, Universidad de los Andes- Systems and Computing Engineering Department | Carlos Franco-Muñoz; Diego A. Álvarez-Díaz; Diego Andrés Prada; Gerardo Santamaría Jorge Duitama; Héctor Alejandro Ruiz-Moreno; Jhonattan Reales-González; Jorge Ivan Díaz; Julian Naizaque; Katherine Laiton-Donato; Laura Natalia Gonzalez; Magdalena Wiesner; Marcela Mercado-Reyes; Maria T. Herrera-Sepúlveda; Martha Lucia Ospina Martinez; Mauricio Pacheco-Montealegre; Sheryll Corchuelo; Silvia Restrepo-Restrepo                                                       |
| EPI_ISL_3459376, EPI_ISL_3459406, EPI_ISL_3459408                                                                                                                                                                                                                                                                                                                                                                                                                                                                                                                                                                                                                                                                                                                                                                                                                                                                                                                              | CLINICA PRIMAVERA DE VILLAVICENCIO                                                                                                                 | Instituto Nacional de Salud                                                                                                                                                                                                                            | Carlos Franco-Muñoz; Carmen Osorio; Diana Malo; Diego A. Álvarez-Díaz; Diego Andrés Prada; Gerardo Santamaría; Hector Alejandro Ruiz-Moreno; Jhonattan Reales-González; Jorge Rivera; Juan Camilo Martinez; Julian Naizaque; Katherine Laiton-Donato; Lisseth Pardo; Magdalena Wiesner; Marcela Mercado-Reyes; Maria T. Herrera-Sepúlveda; Marta Lopez Blanco; Martha Lucia Ospina Martinez; Paola Rojas; Sergio Gomez; Sheryll Corchuelo; Ángela Alarcon Cruz                    |
| EPI_ISL_3355514, EPI_ISL_3355515, EPI_ISL_3355516                                                                                                                                                                                                                                                                                                                                                                                                                                                                                                                                                                                                                                                                                                                                                                                                                                                                                                                              | CLINICA PUTUMAYO                                                                                                                                   | Corporacion CorpoGen-Universidad de los Andes-Universidad Central                                                                                                                                                                                      | Christian Romero; Jorge Duitama; Juan Manuel Anzola; Laura González; Maryam Chaib De Mares; Maria Mercedes Zambrano; Nelly Díaz; Patricia Del Portillo; Silvia Restrepo                                                                                                                                                                                                                                                                                                           |
| EPI_ISL_1629738, EPI_ISL_1629739, EPI_ISL_1629740, EPI_ISL_1629741, EPI_ISL_1629742, EPI_ISL_1675308, EPI_ISL_1675309                                                                                                                                                                                                                                                                                                                                                                                                                                                                                                                                                                                                                                                                                                                                                                                                                                                          | CLINICA U BOLIVARIANA                                                                                                                              | Universidad Nacional de Colombia - Laboratorio Genómico One Health                                                                                                                                                                                     | Andrés F. Cardona-Rios; Carlos Franco-Muñoz; Daniel O. Maldonado-Perez; Diego A. Álvarez-Díaz; Eliana Patricia Calvo Tapiero; Hector Alejandro Ruiz-Moreno; Idabely Betancur Ortiz; Jorge E. Osorio; Juan P. Hernandez-Ortiz; Karl A Ciuderis; Katherine Laiton-Donato; Laura Silvana Perez; Lina M. Hurtado; Marcela Mercado-Reyes; Maria Angélica Maya; Maria Stella López; Rita Almanza Payares; Sandra Ines Cano; Simón Villegas Velásquez                                    |
| EPI_ISL_2155042, EPI_ISL_3385771, EPI_ISL_3385790, EPI_ISL_3385796, EPI_ISL_3385855                                                                                                                                                                                                                                                                                                                                                                                                                                                                                                                                                                                                                                                                                                                                                                                                                                                                                            | COLCAN                                                                                                                                             | Instituto Nacional de Salud- Dirección de Investigación en Salud Pública                                                                                                                                                                               | Carlos Franco-Muñoz; Carmen Osorio; Diana Malo; Diego A. Álvarez-Díaz; Diego Andrés Prada; Gerardo Santamaría; Hector Alejandro Ruiz-Moreno; Jhonattan Reales-González; Jorge Rivera; Juan Camilo Martinez; Julian Naizaque; Katherine Laiton-Donato; Lisseth Pardo; Magdalena Wiesner; Marcela Mercado-Reyes; Maria T. Herrera-Sepúlveda; Marta Lopez Blanco; Martha Lucia Ospina Martinez; Paola Rojas; Sergio Gomez; Sheryll Corchuelo; Ángela Alarcon Cruz                    |
| EPI_ISL_2674313, EPI_ISL_2674314, EPI_ISL_2674315, EPI_ISL_2674316                                                                                                                                                                                                                                                                                                                                                                                                                                                                                                                                                                                                                                                                                                                                                                                                                                                                                                             | COMFANDI - SAN NICOLAS                                                                                                                             | Instituto Nacional de Salud- Dirección de Investigación en Salud Pública                                                                                                                                                                               | Carlos Franco-Muñoz; Carmen Osorio; Diana Malo; Diego A. Álvarez-Díaz; Diego Andrés Prada; Gerardo Santamaría; Hector Alejandro Ruiz-Moreno; Jhonattan Reales-González; Jorge Rivera; Juan Camilo Martinez; Julian Naizaque; Katherine Laiton-Donato; Lisseth Pardo; Magdalena Wiesner; Marcela Mercado-Reyes; Maria T. Herrera-Sepúlveda; Marta Lopez Blanco; Martha Lucia Ospina Martinez; Paola Rojas; Sergio Gomez; Sheryll Corchuelo; Ángela Alarcon Cruz                    |
| EPI_ISL_1632500, EPI_ISL_1632501, EPI_ISL_1632502                                                                                                                                                                                                                                                                                                                                                                                                                                                                                                                                                                                                                                                                                                                                                                                                                                                                                                                              | CONFANDI SAN NICOLAS                                                                                                                               | Instituto Nacional de Salud- Dirección de Investigación en Salud Pública                                                                                                                                                                               | Carlos Franco-Muñoz; Carmen Osorio; Diana Malo; Diego A. Álvarez-Díaz; Diego Andrés Prada; Gerardo Santamaría; Hector Alejandro Ruiz-Moreno; Jhonattan Reales-González; Jorge Rivera; Juan Camilo Martinez; Julian Naizaque; Katherine Laiton-Donato; Lisseth Pardo; Magdalena Wiesner; Marcela Mercado-Reyes; Maria T. Herrera-Sepúlveda; Marta Lopez Blanco; Martha Lucia Ospina Martinez; Paola Rojas; Sergio Gomez; Sheryll Corchuelo; Ángela Alarcon Cruz                    |
| EPI_ISL_2674337                                                                                                                                                                                                                                                                                                                                                                                                                                                                                                                                                                                                                                                                                                                                                                                                                                                                                                                                                                | CORPOMEDICA                                                                                                                                        | Instituto Nacional de Salud- Dirección de Investigación en Salud Pública                                                                                                                                                                               | Carlos Franco-Muñoz; Carmen Osorio; Diana Malo; Diego A. Álvarez-Díaz; Diego Andrés Prada; Gerardo Santamaría; Hector Alejandro Ruiz-Moreno; Jhonattan Reales-González; Jorge Rivera; Juan Camilo Martinez; Julian Naizaque; Katherine Laiton-Donato; Lisseth Pardo; Magdalena Wiesner; Marcela Mercado-Reyes; Maria T. Herrera-Sepúlveda; Marta Lopez Blanco; Martha Lucia Ospina Martinez; Paola Rojas; Sergio Gomez; Sheryll Corchuelo; Ángela Alarcon Cruz                    |
| EPI_ISL_2657867, EPI_ISL_2657868                                                                                                                                                                                                                                                                                                                                                                                                                                                                                                                                                                                                                                                                                                                                                                                                                                                                                                                                               | COVID 19- EPS FAMILANAR                                                                                                                            | Instituto Nacional de Salud- Dirección de Investigación en Salud Pública                                                                                                                                                                               | Carlos Franco-Muñoz; Carmen Osorio; Diana Malo; Diego A. Álvarez-Díaz; Diego Andrés Prada; Gerardo Santamaría; Hector Alejandro Ruiz-Moreno; Jhonattan Reales-González; Jorge Rivera; Juan Camilo Martinez; Julian Naizaque; Katherine Laiton-Donato; Lisseth Pardo; Magdalena Wiesner; Marcela Mercado-Reyes; Maria T. Herrera-Sepúlveda; Marta Lopez Blanco; Martha Lucia Ospina Martinez; Paola Rojas; Sergio Gomez; Sheryll Corchuelo; Ángela Alarcon Cruz                    |
| EPI_ISL_1220046                                                                                                                                                                                                                                                                                                                                                                                                                                                                                                                                                                                                                                                                                                                                                                                                                                                                                                                                                                | Carvajal Laboratorio IPS SAS                                                                                                                       | Instituto Nacional de Salud- Dirección de Investigación en Salud Pública                                                                                                                                                                               | Carlos Franco-Muñoz; Diego A. Álvarez-Díaz; Diego Andrés Prada; Gerardo Santamaría; Hector Alejandro Ruiz-Moreno; Jhonattan Reales-González; Julian Naizaque; Katherine Laiton-Donato; Magdalena Wiesner; Marcela Mercado-Reyes; Maria T. Herrera-Sepúlveda; Martha Lucia Ospina Martinez; Sheryll Corchuelo                                                                                                                                                                      |
| EPI_ISL_794663                                                                                                                                                                                                                                                                                                                                                                                                                                                                                                                                                                                                                                                                                                                                                                                                                                                                                                                                                                 | Carvajal Laboratorios                                                                                                                              | Instituto Nacional de Salud - Dirección de Investigación en Salud Pública                                                                                                                                                                              | Carlos Franco-Muñoz; Diego A. Álvarez-Díaz; Diego Andrés Prada; Gerardo Santamaría; Jonathan Reales; Julian Naizaque; Katherine Laiton-Donato; Magdalena Wiesner; Marcela Mercado-Reyes; Maria T. Herrera-Sepúlveda; Martha Lucia Ospina Martinez; Mauricio Pacheco-Montealegre; Paola Muñoz-Laiton; Sheryll Corchuelo                                                                                                                                                            |
| EPI_ISL_2674351, EPI_ISL_2674352                                                                                                                                                                                                                                                                                                                                                                                                                                                                                                                                                                                                                                                                                                                                                                                                                                                                                                                                               | Centro de Atención y Daignóstico de Enfermedades Infecciosas-CDI                                                                                   | Instituto Nacional de Salud- Dirección de Investigación en Salud Pública                                                                                                                                                                               | Carlos Franco-Muñoz; Carmen Osorio; Diana Malo; Diego A. Álvarez-Díaz; Diego Andrés Prada; Gerardo Santamaría; Hector Alejandro Ruiz-Moreno; Jhonattan Reales-González; Jorge Rivera; Juan Camilo Martinez; Julian Naizaque; Katherine Laiton-Donato; Lisseth Pardo; Magdalena Wiesner; Marcela Mercado-Reyes; Maria T. Herrera-Sepúlveda; Marta Lopez Blanco; Martha Lucia Ospina Martinez; Paola Rojas; Sergio Gomez; Sheryll Corchuelo; Ángela Alarcon Cruz                    |
| EPI_ISL_1494948                                                                                                                                                                                                                                                                                                                                                                                                                                                                                                                                                                                                                                                                                                                                                                                                                                                                                                                                                                | Centro de Atención y Diagnóstico de Enfermedades Infecciosas                                                                                       | Instituto Nacional de Salud- Dirección de Investigación en Salud Pública                                                                                                                                                                               | Carlos Franco-Muñoz; Carmen Osorio; Diana Malo; Diego A. Álvarez-Díaz; Diego Andrés Prada; Gerardo Santamaría; Hector Alejandro Ruiz-Moreno; Jhonattan Reales-González; Juan Camilo Martinez; Julian Naizaque; Katherine Laiton-Donato; Lisseth Pardo; Magdalena Wiesner; Marcela Mercado-Reyes; Maria T. Herrera-Sepúlveda; Martha Lucia Ospina Martinez; Paola Rojas; Sergio Gomez; Sheryll Corchuelo; Ángela Alarcon Cruz                                                      |
| EPI_ISL_2339875, EPI_ISL_2339876, EPI_ISL_2339877, EPI_ISL_2339878, EPI_ISL_2339879, EPI_ISL_2339880, EPI_ISL_2339881, EPI_ISL_2339882, EPI_ISL_2339883, EPI_ISL_2339884, EPI_ISL_2339885, EPI_ISL_2339886, EPI_ISL_2339887, EPI_ISL_2339888, EPI_ISL_2339889, EPI_ISL_2339890, EPI_ISL_2339891, EPI_ISL_2339901, EPI_ISL_2339902, EPI_ISL_2339903, EPI_ISL_2339904, EPI_ISL_2339905, EPI_ISL_2339906, EPI_ISL_2339907, EPI_ISL_2339908, EPI_ISL_2339909                                                                                                                                                                                                                                                                                                                                                                                                                                                                                                                       | Centro de Estudio de Enfermedades Autoinmunes (CREA), Universidad del Rosario, Bogotá, Colombia                                                    | Centro de Investigaciones en Microbiología y Biotecnología-UR (CIMBIUR), Facultad de Ciencias Naturales, Universidad del Rosario, Bogotá, Colombia                                                                                                     | Carolina Ramirez-Santana; Gustavo Salguero; Juan David Ramirez; Juan Esteban Gallo; Juan-Manuel Anaya; Luz H. Patiño; Marina Muñoz; Nathalia Ballesteros; Sergio Castañeda                                                                                                                                                                                                                                                                                                        |
| EPI_ISL_941104, EPI_ISL_941105, EPI_ISL_941106, EPI_ISL_941107, EPI_ISL_941108, EPI_ISL_941109, EPI_ISL_941110, EPI_ISL_941111, EPI_ISL_941112, EPI_ISL_941113, EPI_ISL_941114, EPI_ISL_941115, EPI_ISL_941116, EPI_ISL_941117, EPI_ISL_941118, EPI_ISL_941119, EPI_ISL_941120, EPI_ISL_941121, EPI_ISL_941122, EPI_ISL_941123, EPI_ISL_941124, EPI_ISL_941125, EPI_ISL_941126, EPI_ISL_941127, EPI_ISL_941128, EPI_ISL_941129, EPI_ISL_941130, EPI_ISL_941131, EPI_ISL_941132, EPI_ISL_941133, EPI_ISL_941134, EPI_ISL_941135, EPI_ISL_941136, EPI_ISL_941137, EPI_ISL_941138, EPI_ISL_941139, EPI_ISL_941140, EPI_ISL_941141, EPI_ISL_941142, EPI_ISL_941143, EPI_ISL_941144, EPI_ISL_941145, EPI_ISL_941146, EPI_ISL_941147, EPI_ISL_941148, EPI_ISL_941149, EPI_ISL_941150, EPI_ISL_941151, EPI_ISL_941152, EPI_ISL_941153, EPI_ISL_941154, EPI_ISL_941155, EPI_ISL_941156, EPI_ISL_941157, EPI_ISL_941158, EPI_ISL_941159, EPI_ISL_941160, EPI_ISL_941161, EPI_ISL_941162 | Centro de Investigaciones en Microbiología y Biotecnología-UR (CIMBIUR), Facultad de Ciencias Naturales, Universidad del Rosario, Bogotá, Colombia | Centro de Investigaciones en Microbiología y Biotecnología-UR (CIMBIUR), Facultad de Ciencias Naturales, Universidad del Rosario, Bogotá, Colombia                                                                                                     | Adriana van de Guchte; Alberto Paniz-Mondolfi; Alejandro Fedeg-Rivadeneira; Ana S. Gonzalez-Reiche; Andrés Angel; Carolina Flórez; Carolina Hernández; Emilia Mia Sordillo; Felipe González-Casabianca; Hala Alejei Alshammy; Harm van Bakel; Iván Carrillo; Jaime Cascante; Jayeeta Dutta; Juan David Ramirez; Luz Helena Patiño; Maria M. Hernandez; Mauricio Santos-Vegas; Mónica Palmaruco; Nathalia Ballesteros; Sergio Gomez; Viviana Simon; Zenab Khan                     |
| EPI_ISL_941941, EPI_ISL_941944, EPI_ISL_941945, EPI_ISL_941946, EPI_ISL_941947, EPI_ISL_941948, EPI_ISL_941950, EPI_ISL_941952, EPI_ISL_941954, EPI_ISL_941955, EPI_ISL_941959, EPI_ISL_941961, EPI_ISL_941962, EPI_ISL_941976, EPI_ISL_941977, EPI_ISL_941978, EPI_ISL_941979, EPI_ISL_941980, EPI_ISL_941981, EPI_ISL_941982, EPI_ISL_941983, EPI_ISL_941995, EPI_ISL_941996, EPI_ISL_941997, EPI_ISL_941998, EPI_ISL_941999, EPI_ISL_942000, EPI_ISL_942001, EPI_ISL_942002, EPI_ISL_942004, EPI_ISL_942005, EPI_ISL_944634, EPI_ISL_944635, EPI_ISL_944636, EPI_ISL_944637, EPI_ISL_944638                                                                                                                                                                                                                                                                                                                                                                                 | Centro de Investigaciones en Microbiología y Biotecnología-UR (CIMBIUR), Facultad de Ciencias Naturales, Universidad del Rosario, Bogotá, Colombia | Centro de Investigaciones en Microbiología y Biotecnología-UR (CIMBIUR), Facultad de Ciencias Naturales, Universidad del Rosario, Bogotá, Colombia                                                                                                     | Adriana van de Guchte; Alberto Paniz-Mondolfi; Ana S. Gonzalez-Reiche; Carolina Flórez; Carolina Hernández; Emilia Mia Sordillo; Hala Alejei Alshammy; Harm van Bakel; Jayeeta Dutta; Juan David Ramirez; Luz Helena Patiño; Marina Muñoz; Matthew M. Hernandez; Nathalia Ballesteros; Sergio Gomez; Viviana Simon; Zenab Khan                                                                                                                                                    |
| EPI_ISL_3721575, EPI_ISL_3721576, EPI_ISL_3721581, EPI_ISL_3721584, EPI_ISL_3721588, EPI_ISL_3721589, EPI_ISL_3721591, EPI_ISL_3721598, EPI_ISL_3721617                                                                                                                                                                                                                                                                                                                                                                                                                                                                                                                                                                                                                                                                                                                                                                                                                        | see above                                                                                                                                          | Clinica SOMER Rionegro                                                                                                                                                                                                                                 | Universidad Nacional de Colombia - Laboratorio Genómico One Health                                                                                                                                                                                                                                                                                                                                                                                                                |
| EPI_ISL_1494958                                                                                                                                                                                                                                                                                                                                                                                                                                                                                                                                                                                                                                                                                                                                                                                                                                                                                                                                                                | Clinica Universitaria Medicina Integral - Laboratorio Molecular                                                                                    | Instituto Nacional de Salud- Dirección de Investigación en Salud Pública                                                                                                                                                                               | Andrés F. Cardona-Rios; Carlos Franco-Muñoz; Carolina Muñoz-Arango; Celeny Ortiz; Daniel O. Maldonado-Perez; Diego A. Álvarez-Díaz; Hector Alejandro Ruiz-Moreno; Idabely Betancur Ortiz; Jorge E. Osorio; Juan P. Hernandez-Ortiz; Karl A Ciuderis; Katherine Laiton-Donato; Laura Silvana Perez; Lina M. Hurtado; Marcela Mercado-Reyes; Maria Angélica Maya; Maria Stella López; Rita Almanza Payares; Sandra Ines Cano; Simón Villegas Velásquez                              |
| EPI_ISL_1303368                                                                                                                                                                                                                                                                                                                                                                                                                                                                                                                                                                                                                                                                                                                                                                                                                                                                                                                                                                | Clinica de la Costa                                                                                                                                | Instituto Nacional de Salud- Dirección de Investigación en Salud Pública                                                                                                                                                                               | Carlos Franco-Muñoz; Carmen Osorio; Diana Malo; Diego A. Álvarez-Díaz; Diego Andrés Prada; Gerardo Santamaría; Hector Alejandro Ruiz-Moreno; Jhonattan Reales-González; Juan Camilo Martinez; Julian Naizaque; Katherine Laiton-Donato; Lisseth Pardo; Magdalena Wiesner; Marcela Mercado-Reyes; Maria T. Herrera-Sepúlveda; Marta Lopez Blanco; Martha Lucia Ospina Martinez; Paola Rojas; Sergio Gomez; Sheryll Corchuelo; Ángela Alarcon Cruz                                  |
| EPI_ISL_1017711                                                                                                                                                                                                                                                                                                                                                                                                                                                                                                                                                                                                                                                                                                                                                                                                                                                                                                                                                                | Clinica del norte                                                                                                                                  | Instituto Nacional de Salud- Dirección de Investigación en Salud Pública                                                                                                                                                                               | Carlos Franco-Muñoz; Diego A. Álvarez-Díaz; Diego Andrés Prada; Gerardo Santamaría; Hector Alejandro Ruiz-Moreno; Jhonattan Reales-González; Julian Naizaque; Katherine Laiton-Donato; Magdalena Wiesner; Marcela Mercado-Reyes; Maria T. Herrera-Sepúlveda; Martha Lopez Blanco; Martha Lucia Ospina Martinez; Sheryll Corchuelo                                                                                                                                                 |
| EPI_ISL_1805633, EPI_ISL_1820962, EPI_ISL_1821066, EPI_ISL_1821067, EPI_ISL_1821068                                                                                                                                                                                                                                                                                                                                                                                                                                                                                                                                                                                                                                                                                                                                                                                                                                                                                            | Clinica los Nogales                                                                                                                                | Instituto Nacional de Salud- Dirección de Investigación en Salud Pública                                                                                                                                                                               | Carlos Franco-Muñoz; Carmen Osorio; Diana Malo; Diego A. Álvarez-Díaz; Diego Andrés Prada; Gerardo Santamaría; Hector Alejandro Ruiz-Moreno; Jhonattan Reales-González; Jorge Rivera; Juan Camilo Martinez; Julian Naizaque; Katherine Laiton-Donato; Lisseth Pardo; Magdalena Wiesner; Marcela Mercado-Reyes; Maria T. Herrera-Sepúlveda; Marta Lopez Blanco; Martha Lucia Ospina Martinez; Paola Rojas; Sergio Gomez; Sheryll Corchuelo; Ángela Alarcon Cruz                    |
| EPI_ISL_2142003, EPI_ISL_2148602, EPI_ISL_2150975, EPI_ISL_2151000, EPI_ISL_2151070, EPI_ISL_2151071, EPI_ISL_2151072, EPI_ISL_2151105, EPI_ISL_2151106, EPI_ISL_2151107, EPI_ISL_2151121, EPI_ISL_2151155                                                                                                                                                                                                                                                                                                                                                                                                                                                                                                                                                                                                                                                                                                                                                                     | see above                                                                                                                                          | Clinica Meta                                                                                                                                                                                                                                           | Instituto de Virología-Universidad El Bosque                                                                                                                                                                                                                                                                                                                                                                                                                                      |
| EPI_ISL_1494957                                                                                                                                                                                                                                                                                                                                                                                                                                                                                                                                                                                                                                                                                                                                                                                                                                                                                                                                                                | Clinica Primavera                                                                                                                                  | Instituto Nacional de Salud- Dirección de Investigación en Salud Pública                                                                                                                                                                               | Adriana Franco; Andrés F. Cardona-Rios; Carolina Coronel-Ruiz; Eliana P. Calvo; Felix G. Delgado; Jaime E. Castellanos; Jhann Andrés Arturo; Jorge E. Osorio; Juan P. Hernandez-Ortiz; Karl A Ciuderis; L. Johana Madroño; Lady Lopez; Laura Silvana Pérez; Lilia Bernal-Cepeda; Maria Fernanda Montañez-Suarez; María Stella López; María Angélica Calderón-Peláez; Sigrid J. Camacho-Ortega; Sonia P. Bohórquez; Myriam Lucia Velandia-Romero                                   |
| EPI_ISL_1494952, EPI_ISL_1494953                                                                                                                                                                                                                                                                                                                                                                                                                                                                                                                                                                                                                                                                                                                                                                                                                                                                                                                                               | Comfandi                                                                                                                                           | Instituto Nacional de Salud- Dirección de Investigación en Salud Pública                                                                                                                                                                               | Carlos Franco-Muñoz; Carmen Osorio; Diana Malo; Diego A. Álvarez-Díaz; Diego Andrés Prada; Gerardo Santamaría; Hector Alejandro Ruiz-Moreno; Jhonattan Reales-González; Juan Camilo Martinez; Julian Naizaque; Katherine Laiton-Donato; Lisseth Pardo; Magdalena Wiesner; Marcela Mercado-Reyes; Maria T. Herrera-Sepúlveda; Marta Lopez Blanco; Martha Lucia Ospina Martinez; Paola Rojas; Sergio Gomez; Sheryll Corchuelo; Ángela Alarcon Cruz                                  |
| EPI_ISL_3368470, EPI_ISL_3368474, EPI_ISL_3368475, EPI_ISL_4417562, EPI_ISL_4417582, EPI_ISL_4417583, EPI_ISL_4417584, EPI_ISL_4417613, EPI_ISL_4417618, EPI_ISL_4417636                                                                                                                                                                                                                                                                                                                                                                                                                                                                                                                                                                                                                                                                                                                                                                                                       | see above                                                                                                                                          | Compensar Calle 63                                                                                                                                                                                                                                     | Centro de Investigaciones en Microbiología y Biotecnología-UR (CIMBIUR), Facultad de Ciencias Naturales, Universidad del Rosario, Bogotá, Colombia                                                                                                                                                                                                                                                                                                                                |
| EPI_ISL_2009069, EPI_ISL_2155043, EPI_ISL_2155044, EPI_ISL_2158345                                                                                                                                                                                                                                                                                                                                                                                                                                                                                                                                                                                                                                                                                                                                                                                                                                                                                                             | DIRECCION DE SANIDAD EJERCITO NACIONAL                                                                                                             | Instituto Nacional de Salud- Dirección de Investigación en Salud Pública                                                                                                                                                                               | Carlos Franco-Muñoz; Carmen Osorio; Diana Malo; Diego A. Álvarez-Díaz; Diego Andrés Prada; Gerardo Santamaría; Hector Alejandro Ruiz-Moreno; Jhonattan Reales-González; Jorge Rivera; Juan Camilo Martinez; Julian Naizaque; Katherine Laiton-Donato; Lisseth Pardo; Magdalena Wiesner; Marcela Mercado-Reyes; Maria T. Herrera-Sepúlveda; Marta Lopez Blanco; Martha Lucia Ospina Martinez; Paola Rojas; Sergio Gomez; Sheryll Corchuelo; Ángela Alarcon Cruz                    |

|                                                                                                                                                                                                                                                                                                                                   |                                                               |                                                                                                                                                                                                                                                        |                                                                                                                                                                                                                                                                                                                                                                                                                                                                                                                      |
|-----------------------------------------------------------------------------------------------------------------------------------------------------------------------------------------------------------------------------------------------------------------------------------------------------------------------------------|---------------------------------------------------------------|--------------------------------------------------------------------------------------------------------------------------------------------------------------------------------------------------------------------------------------------------------|----------------------------------------------------------------------------------------------------------------------------------------------------------------------------------------------------------------------------------------------------------------------------------------------------------------------------------------------------------------------------------------------------------------------------------------------------------------------------------------------------------------------|
| EPI_ISL_794658                                                                                                                                                                                                                                                                                                                    | DIRECCION DE SANIDAD POLICIA NACIONAL                         | Instituto Nacional de Salud - Dirección de Investigación en Salud Pública                                                                                                                                                                              | Carlos Franco-Muñoz; Diego A. Álvarez-Díaz; Diego Andrés Prada; Gerardo Santamaría; Jonathan Reales; Julian Naizaque; Katherine Laiton-Donato; Magdalena Wiesner; Marcela Mercado-Reyes; María T. Herrera; Martha Lucia Ospina Martínez; Mauricio Pacheco-Montealegre; Paola Muñoz-Laiton; Sheryll Corchuelo                                                                                                                                                                                                         |
| EPI_ISL_906550, EPI_ISL_906551                                                                                                                                                                                                                                                                                                    | DIRECCION DEPARTAMENTAL DE SALUD DE AMAZONAS                  | Instituto Nacional de Salud- Dirección de Investigación en Salud Pública, Universidad de los Andes- Applied genomics research group, Vicerrectoría de Investigación y Creación, Universidad de los Andes- Systems and Computing Engineering Department | Carlos Franco-Muñoz; Diego A. Álvarez-Díaz; Diego Andrés Prada; Gerardo Santamaría Jorge Duitama; Héctor Alejandro Ruiz-Moreno; Jhonattan Reales-González; Jorge Ivan Díaz; Julian Naizaque; Katherine Laiton-Donato; Laura Natalia Gonzalez; Magdalena Wiesner; Marcela Mercado-Reyes; María T. Herrera-Sepúlveda; Martha Lucia Ospina Martínez; Mauricio Pacheco-Montealegre; Sheryll Corchuelo; Silvia Restrepo-Restrepo                                                                                          |
| EPI_ISL_906556                                                                                                                                                                                                                                                                                                                    | DIRECCION DEPARTAMENTAL DE SALUD DE GUAJIRA                   | Instituto Nacional de Salud- Dirección de Investigación en Salud Pública, Universidad de los Andes- Applied genomics research group, Vicerrectoría de Investigación y Creación, Universidad de los Andes- Systems and Computing Engineering Department | Carlos Franco-Muñoz; Diego A. Álvarez-Díaz; Diego Andrés Prada; Gerardo Santamaría Jorge Duitama; Héctor Alejandro Ruiz-Moreno; Jhonattan Reales-González; Jorge Ivan Díaz; Julian Naizaque; Katherine Laiton-Donato; Laura Natalia Gonzalez; Magdalena Wiesner; Marcela Mercado-Reyes; María T. Herrera-Sepúlveda; Martha Lucia Ospina Martínez; Mauricio Pacheco-Montealegre; Sheryll Corchuelo; Silvia Restrepo-Restrepo                                                                                          |
| EPI_ISL_2834726, EPI_ISL_2834728                                                                                                                                                                                                                                                                                                  | DISAN POLICIA NACIONAL                                        | Instituto Nacional de Salud- Dirección de Investigación en Salud Pública                                                                                                                                                                               | Carlos Franco-Muñoz; Carmen Osorio; Diana Malo; Diego A. Álvarez-Díaz; Diego Andrés Prada; Gerardo Santamaría; Hector Alejandro Ruiz-Moreno; Jhonattan Reales-González; Jorge Rivera; Juan Camilo Martínez; Julian Naizaque; Katherine Laiton-Donato; Lisseth Pardo; Magdalena Wiesner; Marcela Mercado-Reyes; María T. Herrera-Sepúlveda; Marta Lopez Blanco; Martha Lucia Ospina Martínez; Paola Rojas; Sergio Gomez; Sheryll Corchuelo; Ángela Alarcon Cruz                                                       |
| EPI_ISL_4028598, EPI_ISL_4028608, EPI_ISL_4028609                                                                                                                                                                                                                                                                                 | DISAN POLICIA NACIONAL                                        | Molecular Genetics and Antimicrobial Resistance - UGRA, Universidad El Bosque                                                                                                                                                                          | Betsy Castro; Catalina Espitia; Jinneth Reyes; Lorena Diaz; Marcela Mercado; Mauricio Pacheco; Rafael Rios; Sandra Rincon; Valentina Martínez                                                                                                                                                                                                                                                                                                                                                                        |
| EPI_ISL_794661                                                                                                                                                                                                                                                                                                                    | DRECCION DE SANIDAD POLICIA NACIONAL                          | Instituto Nacional de Salud - Dirección de Investigación en Salud Pública                                                                                                                                                                              | Carlos Franco-Muñoz; Diego A. Álvarez-Díaz; Diego Andrés Prada; Gerardo Santamaría; Jonathan Reales; Julian Naizaque; Katherine Laiton-Donato; Magdalena Wiesner; Marcela Mercado-Reyes; María T. Herrera; Martha Lucia Ospina Martínez; Mauricio Pacheco-Montealegre; Paola Muñoz-Laiton; Sheryll Corchuelo                                                                                                                                                                                                         |
| EPI_ISL_4006772                                                                                                                                                                                                                                                                                                                   | Diagnóstico CIB                                               | Corporación para Investigaciones Biológicas-CIB                                                                                                                                                                                                        | Jeaneth Mosquera Rendon; Katterine Molina Hoyos; Marcela Mercado Reyes; Uriel A. Hurtado Paez                                                                                                                                                                                                                                                                                                                                                                                                                        |
| EPI_ISL_906529                                                                                                                                                                                                                                                                                                                    | Direccion de departamental de salud del Amazonas              | Instituto Nacional de Salud- Dirección de Investigación en Salud Pública, Universidad de los Andes- Applied genomics research group, Vicerrectoría de Investigación y Creación, Universidad de los Andes- Systems and Computing Engineering Department | Carlos Franco-Muñoz; Diego A. Álvarez-Díaz; Diego Andrés Prada; Gerardo Santamaría Jorge Duitama; Héctor Alejandro Ruiz-Moreno; Jhonattan Reales-González; Jorge Ivan Díaz; Julian Naizaque; Katherine Laiton-Donato; Laura Natalia Gonzalez; Magdalena Wiesner; Marcela Mercado-Reyes; María T. Herrera-Sepúlveda; Martha Lucia Ospina Martínez; Mauricio Pacheco-Montealegre; Sheryll Corchuelo; Silvia Restrepo-Restrepo                                                                                          |
| EPI_ISL_902736                                                                                                                                                                                                                                                                                                                    | Dirección Departamental de Salud de Pública Leticia           | Instituto Nacional de Salud- Dirección de Investigación en Salud Pública, Universidad de los Andes- Applied genomics research group, Vicerrectoría de Investigación y Creación, Universidad de los Andes- Systems and Computing Engineering Department | Carlos Franco-Muñoz; Diego A. Álvarez-Díaz; Diego Andrés Prada; Jorge Duitama; Jorge Ivan Díaz; Katherine Laiton-Donato; Laura Natalia Gonzalez; Magdalena Wiesner; Marcela Mercado-Reyes; María T. Herrera-Sepúlveda; Martha Lucia Ospina Martínez; Mauricio Pacheco-Montealegre; Silvia Restrepo-Restrepo                                                                                                                                                                                                          |
| EPI_ISL_845621, EPI_ISL_845622, EPI_ISL_845623, EPI_ISL_845624, EPI_ISL_845625                                                                                                                                                                                                                                                    | Dirección de Sanidad Ejército                                 | Instituto Nacional de Salud - Dirección de Investigación en Salud Pública                                                                                                                                                                              | Carlos Franco-Muñoz; Diego A. Álvarez-Díaz; Diego Andrés Prada; Gerardo Santamaría; Jonathan Reales; Julian Naizaque; Katherine Laiton-Donato; Magdalena Wiesner; Marcela Mercado-Reyes; María T. Herrera-Sepúlveda; Martha Lucia Ospina Martínez; Mauricio Pacheco-Montealegre; Paola Muñoz-Laiton; Sheryll Corchuelo                                                                                                                                                                                               |
| EPI_ISL_1137618, EPI_ISL_1303371, EPI_ISL_1303372, EPI_ISL_1303373                                                                                                                                                                                                                                                                | Dirección de Sanidad Policía Nacional                         | Instituto Nacional de Salud- Dirección de Investigación en Salud Pública                                                                                                                                                                               | Carlos Franco-Muñoz; Carmen Osorio; Diana Malo; Diego A. Álvarez-Díaz; Diego Andrés Prada; Gerardo Santamaría; Hector Alejandro Ruiz-Moreno; Jhonattan Reales-González; Juan Camilo Martínez; Julian Naizaque; Katherine Laiton-Donato; Lisseth Pardo; Magdalena Wiesner; Marcela Mercado-Reyes; Marcela Mercado-Reyes.; María T. Herrera-Sepúlveda; Marta Lopez Blanco; Martha Lucia Ospina Martínez; Martha Lucia Ospina Martínez; Sergio Gomez; Sheryll Corchuelo; Ángela Alarcon Cruz                            |
| EPI_ISL_3391977, EPI_ISL_3391979, EPI_ISL_3391983                                                                                                                                                                                                                                                                                 | Disan Policía Nacional                                        | Instituto Nacional de Salud- Dirección de Investigación en Salud Pública                                                                                                                                                                               | Carlos Franco-Muñoz; Carmen Osorio; Diana Malo; Diego A. Álvarez-Díaz; Diego Andrés Prada; Gerardo Santamaría; Hector Alejandro Ruiz-Moreno; Jhonattan Reales-González; Jorge Rivera; Juan Camilo Martínez; Julian Naizaque; Katherine Laiton-Donato; Lisseth Pardo; Magdalena Wiesner; Marcela Mercado-Reyes; María T. Herrera-Sepúlveda; Marta Lopez Blanco; Martha Lucia Ospina Martínez; Paola Rojas; Sergio Gomez; Sheryll Corchuelo; Ángela Alarcon Cruz                                                       |
| EPI_ISL_1220066, EPI_ISL_1582978, EPI_ISL_1582979, EPI_ISL_1582980, EPI_ISL_2828045, EPI_ISL_2828046, EPI_ISL_2828047, EPI_ISL_2828048, EPI_ISL_2828049, EPI_ISL_2828050, EPI_ISL_2828051, EPI_ISL_2828052, EPI_ISL_2828053                                                                                                       | see above                                                     | E.S.E. HOSPITAL SAN JOSE DE MAICAO                                                                                                                                                                                                                     | Carlos Franco-Muñoz; Carmen Osorio; Diana Malo; Diego A. Álvarez-Díaz; Diego Andrés Prada; Gerardo Santamaría; Hector Alejandro Ruiz-Moreno; Jhonattan Reales-González; Jorge Rivera; Juan Camilo Martínez; Julian Naizaque; Katherine Laiton-Donato; Lisseth Pardo; Magdalena Wiesner; Marcela Mercado-Reyes; Marcela Mercado-Reyes.; María T. Herrera-Sepúlveda; Marta Lopez Blanco; Martha Lucia Ospina Martínez; Martha Lucia Ospina Martínez; Sergio Gomez; Sheryll Corchuelo; Ángela Alarcon Cruz              |
| EPI_ISL_906545                                                                                                                                                                                                                                                                                                                    | E.S.E. HOSPITAL SAN JOSE DE MAICAO                            | Instituto Nacional de Salud- Dirección de Investigación en Salud Pública, Universidad de los Andes- Applied genomics research group, Vicerrectoría de Investigación y Creación, Universidad de los Andes- Systems and Computing Engineering Department | Carlos Franco-Muñoz; Diego A. Álvarez-Díaz; Diego Andrés Prada; Gerardo Santamaría Jorge Duitama; Héctor Alejandro Ruiz-Moreno; Jhonattan Reales-González; Jorge Ivan Díaz; Julian Naizaque; Katherine Laiton-Donato; Laura Natalia Gonzalez; Magdalena Wiesner; Marcela Mercado-Reyes; María T. Herrera-Sepúlveda; Martha Lucia Ospina Martínez; Mauricio Pacheco-Montealegre; Sheryll Corchuelo; Silvia Restrepo-Restrepo                                                                                          |
| EPI_ISL_1220053, EPI_ISL_2674349                                                                                                                                                                                                                                                                                                  | EMPRESA SOCIAL DEL ESTADO HOSPITAL UNIVERSITARIO DE SANTANDER | Instituto Nacional de Salud- Dirección de Investigación en Salud Pública                                                                                                                                                                               | Carlos Franco-Muñoz; Carmen Osorio; Diana Malo; Diego A. Álvarez-Díaz; Diego Andrés Prada; Gerardo Santamaría; Hector Alejandro Ruiz-Moreno; Jhonattan Reales-González; Jorge Rivera; Juan Camilo Martínez; Julian Naizaque; Katherine Laiton-Donato; Lisseth Pardo; Magdalena Wiesner; Marcela Mercado-Reyes; Marcela Mercado-Reyes.; María T. Herrera-Sepúlveda; Marta Lopez Blanco; Martha Lucia Ospina Martínez; Martha Lucia Ospina Martínez; Sergio Gomez; Sheryll Corchuelo; Ángela Alarcon Cruz              |
| EPI_ISL_956304, EPI_ISL_956305                                                                                                                                                                                                                                                                                                    | ESE INSTITUTO NACIONAL DE CANCEROLOGIA                        | Instituto Nacional de Salud- Dirección de Investigación en Salud Pública                                                                                                                                                                               | Carlos Franco-Muñoz; Diego A. Álvarez-Díaz; Diego Andrés Prada; Gerardo Santamaría; Hector Alejandro Ruiz-Moreno; Jhonattan Reales-González; Julian Naizaque; Katherine Laiton-Donato; Magdalena Wiesner; Marcela Mercado-Reyes; María T. Herrera-Sepúlveda; Martha Lopez Blanco; Martha Lucia Ospina Martínez; Mauricio Pacheco-Montealegre; Sheryll Corchuelo                                                                                                                                                      |
| EPI_ISL_1494949                                                                                                                                                                                                                                                                                                                   | ESE. SAN ISIDRO DEL MUNICIPIO DE TONA                         | Instituto Nacional de Salud- Dirección de Investigación en Salud Pública                                                                                                                                                                               | Carlos Franco-Muñoz; Carmen Osorio; Diana Malo; Diego A. Álvarez-Díaz; Diego Andrés Prada; Gerardo Santamaría; Hector Alejandro Ruiz-Moreno; Jhonattan Reales-González; Jorge Rivera; Juan Camilo Martínez; Julian Naizaque; Katherine Laiton-Donato; Lisseth Pardo; Magdalena Wiesner; Marcela Mercado-Reyes; María T. Herrera-Sepúlveda; Marta Lopez Blanco; Martha Lucia Ospina Martínez; Paola Rojas; Sergio Gomez; Sheryll Corchuelo; Ángela Alarcon Cruz                                                       |
| EPI_ISL_2362561                                                                                                                                                                                                                                                                                                                   | FUNDACION CARDIO INFANTIL                                     | Instituto Nacional de Salud- Dirección de Investigación en Salud Pública                                                                                                                                                                               | Carlos Franco-Muñoz; Carmen Osorio; Diana Malo; Diego A. Álvarez-Díaz; Diego Andrés Prada; Gerardo Santamaría; Hector Alejandro Ruiz-Moreno; Jhonattan Reales-González; Jorge Rivera; Juan Camilo Martínez; Julian Naizaque; Katherine Laiton-Donato; Lisseth Pardo; Magdalena Wiesner; Marcela Mercado-Reyes; María T. Herrera-Sepúlveda; Marta Lopez Blanco; Martha Lucia Ospina Martínez; Paola Rojas; Sergio Gomez; Sheryll Corchuelo; Ángela Alarcon Cruz                                                       |
| EPI_ISL_3459385                                                                                                                                                                                                                                                                                                                   | FUNDACION CARDIOINFANTIL                                      | Instituto Nacional de Salud                                                                                                                                                                                                                            | Carlos Franco-Muñoz; Carmen Osorio; Diana Malo; Diego A. Álvarez-Díaz; Diego Andrés Prada; Gerardo Santamaría; Hector Alejandro Ruiz-Moreno; Jhonattan Reales-González; Jorge Rivera; Juan Camilo Martínez; Julian Naizaque; Katherine Laiton-Donato; Lisseth Pardo; Magdalena Wiesner; Marcela Mercado-Reyes; María T. Herrera-Sepúlveda; Marta Lopez Blanco; Martha Lucia Ospina Martínez; Martha Patricia Sánchez Zorro; Paola Rojas; Rodrigo Cabrera Perez; Sergio Gomez; Sheryll Corchuelo; Ángela Alarcon Cruz |
| EPI_ISL_845626                                                                                                                                                                                                                                                                                                                    | FUNDACION CARDIOINFANTIL                                      | Instituto Nacional de Salud - Dirección de Investigación en Salud Pública                                                                                                                                                                              | Carlos Franco-Muñoz; Diego A. Álvarez-Díaz; Diego Andrés Prada; Gerardo Santamaría; Jonathan Reales; Julian Naizaque; Katherine Laiton-Donato; Magdalena Wiesner; Marcela Mercado-Reyes; María T. Herrera-Sepúlveda; Martha Lucia Ospina Martínez; Mauricio Pacheco-Montealegre; Paola Muñoz-Laiton; Sheryll Corchuelo                                                                                                                                                                                               |
| EPI_ISL_3066763, EPI_ISL_3398803, EPI_ISL_3398804, EPI_ISL_3398805, EPI_ISL_3398806, EPI_ISL_3398807, EPI_ISL_3398808, EPI_ISL_3398809                                                                                                                                                                                            | see above                                                     | FUNDACION CARDIOVASCULAR DE COLOMBIA                                                                                                                                                                                                                   | Carlos Franco-Muñoz; Carmen Osorio; Diana Malo; Diego A. Álvarez-Díaz; Diego Andrés Prada; Gerardo Santamaría; Hector Alejandro Ruiz-Moreno; Jhonattan Reales-González; Jorge Rivera; Juan Camilo Martínez; Julian Naizaque; Katherine Laiton-Donato; Lisseth Pardo; Magdalena Wiesner; Marcela Mercado-Reyes; María T. Herrera-Sepúlveda; Marta Lopez Blanco; Martha Lucia Ospina Martínez; Paola Rojas; Sergio Gomez; Sheryll Corchuelo; Ángela Alarcon Cruz                                                       |
| EPI_ISL_3385831                                                                                                                                                                                                                                                                                                                   | FUNDACION CARDIOVASCULAR DE COLOMBIA                          | Instituto Nacional de Salud- Dirección de Investigación en Salud Pública                                                                                                                                                                               | Carlos Franco-Muñoz; Carmen Osorio; Diana Malo; Diego A. Álvarez-Díaz; Diego Andrés Prada; Gerardo Santamaría; Hector Alejandro Ruiz-Moreno; Jhonattan Reales-González; Jorge Rivera; Juan Camilo Martínez; Julian Naizaque; Katherine Laiton-Donato; Lisseth Pardo; Magdalena Wiesner; Marcela Mercado-Reyes; María T. Herrera-Sepúlveda; Marta Lopez Blanco; Martha Lucia Ospina Martínez; Paola Rojas; Sergio Gomez; Sheryll Corchuelo; Ángela Alarcon Cruz                                                       |
| EPI_ISL_2158349                                                                                                                                                                                                                                                                                                                   | FUNDACION HOSPITAL SAN PEDRO                                  | Instituto Nacional de Salud- Dirección de Investigación en Salud Pública                                                                                                                                                                               | Carlos Franco-Muñoz; Carmen Osorio; Diana Malo; Diego A. Álvarez-Díaz; Diego Andrés Prada; Gerardo Santamaría; Hector Alejandro Ruiz-Moreno; Jhonattan Reales-González; Jorge Rivera; Juan Camilo Martínez; Julian Naizaque; Katherine Laiton-Donato; Lisseth Pardo; Magdalena Wiesner; Marcela Mercado-Reyes; María T. Herrera-Sepúlveda; Marta Lopez Blanco; Martha Lucia Ospina Martínez; Paola Rojas; Sergio Gomez; Sheryll Corchuelo; Ángela Alarcon Cruz                                                       |
| EPI_ISL_906543                                                                                                                                                                                                                                                                                                                    | FUNDACION HOSPITAL SAN PEDRO                                  | Instituto Nacional de Salud- Dirección de Investigación en Salud Pública, Universidad de los Andes- Applied genomics research group, Vicerrectoría de Investigación y Creación, Universidad de los Andes- Systems and Computing Engineering Department | Carlos Franco-Muñoz; Diego A. Álvarez-Díaz; Diego Andrés Prada; Gerardo Santamaría Jorge Duitama; Héctor Alejandro Ruiz-Moreno; Jhonattan Reales-González; Jorge Ivan Díaz; Julian Naizaque; Katherine Laiton-Donato; Laura Natalia Gonzalez; Magdalena Wiesner; Marcela Mercado-Reyes; María T. Herrera-Sepúlveda; Martha Lucia Ospina Martínez; Mauricio Pacheco-Montealegre; Sheryll Corchuelo; Silvia Restrepo-Restrepo                                                                                          |
| EPI_ISL_3385801                                                                                                                                                                                                                                                                                                                   | FUNDACION HOSPITAL SAN PEDRO DIOCESIS DE PASTO                | Instituto Nacional de Salud- Dirección de Investigación en Salud Pública                                                                                                                                                                               | Carlos Franco-Muñoz; Carmen Osorio; Diana Malo; Diego A. Álvarez-Díaz; Diego Andrés Prada; Gerardo Santamaría; Hector Alejandro Ruiz-Moreno; Jhonattan Reales-González; Jorge Rivera; Juan Camilo Martínez; Julian Naizaque; Katherine Laiton-Donato; Lisseth Pardo; Magdalena Wiesner; Marcela Mercado-Reyes; María T. Herrera-Sepúlveda; Marta Lopez Blanco; Martha Lucia Ospina Martínez; Paola Rojas; Sergio Gomez; Sheryll Corchuelo; Ángela Alarcon Cruz                                                       |
| EPI_ISL_4300700                                                                                                                                                                                                                                                                                                                   | FUNDACION HOSPITALARIA SAN VICENTE DE PAUL                    | Instituto Nacional de Salud- Dirección de Investigación en Salud Pública                                                                                                                                                                               | Carlos Franco-Muñoz; Carmen Osorio; Diana Malo; Diego A. Álvarez-Díaz; Diego Andrés Prada; Gerardo Santamaría; Hector Alejandro Ruiz-Moreno; Jhonattan Reales-González; Jorge Rivera; Juan Camilo Martínez; Julian Naizaque; Katherine Laiton-Donato; Lisseth Pardo; Magdalena Wiesner; Marcela Mercado-Reyes; María T. Herrera-Sepúlveda; Marta Lopez Blanco; Martha Lucia Ospina Martínez; Paola Rojas; Sergio Gomez; Sheryll Corchuelo; Ángela Alarcon Cruz                                                       |
| EPI_ISL_3066765, EPI_ISL_3066766, EPI_ISL_3066767, EPI_ISL_3066768, EPI_ISL_3066769, EPI_ISL_3398811, EPI_ISL_3398812, EPI_ISL_3398813, EPI_ISL_3398814, EPI_ISL_3398815, EPI_ISL_3398816, EPI_ISL_3398817, EPI_ISL_3398818, EPI_ISL_3398819, EPI_ISL_3398820, EPI_ISL_3459379, EPI_ISL_3459380, EPI_ISL_3459394, EPI_ISL_3459412 | see above                                                     | FUNDACION VALLE DE LILI                                                                                                                                                                                                                                | Carlos Franco-Muñoz; Carmen Osorio; Diana Malo; Diego A. Álvarez-Díaz; Diego Andrés Prada; Gerardo Santamaría; Hector Alejandro Ruiz-Moreno; Jhonattan Reales-González; Jorge Rivera; Juan Camilo Martínez; Julian Naizaque; Katherine Laiton-Donato; Lisseth Pardo; Magdalena Wiesner; Marcela Mercado-Reyes; María T. Herrera-Sepúlveda; Marta Lopez Blanco; Martha Lucia Ospina Martínez; Paola Rojas; Sergio Gomez; Sheryll Corchuelo; Ángela Alarcon Cruz                                                       |
| EPI_ISL_1632497, EPI_ISL_1632498                                                                                                                                                                                                                                                                                                  | FUNDACION VALLE DE LILI                                       | Instituto Nacional de Salud- Dirección de Investigación en Salud Pública                                                                                                                                                                               | Carlos Franco-Muñoz; Carmen Osorio; Diana Malo; Diego A. Álvarez-Díaz; Diego Andrés Prada; Gerardo Santamaría; Hector Alejandro Ruiz-Moreno; Jhonattan Reales-González; Jorge Rivera; Juan Camilo Martínez; Julian Naizaque; Katherine Laiton-Donato; Lisseth Pardo; Magdalena Wiesner; Marcela Mercado-Reyes; María T. Herrera-Sepúlveda; Marta Lopez Blanco; Martha Lucia Ospina Martínez; Paola Rojas; Sergio Gomez; Sheryll Corchuelo; Ángela Alarcon Cruz                                                       |
| EPI_ISL_1220058, EPI_ISL_1220059, EPI_ISL_1220060                                                                                                                                                                                                                                                                                 | FUNDACION VALLE DEL LILI                                      | Instituto Nacional de Salud- Dirección de Investigación en Salud Pública                                                                                                                                                                               | Carlos Franco-Muñoz; Diego A. Álvarez-Díaz; Diego Andrés Prada; Gerardo Santamaría; Hector Alejandro Ruiz-Moreno; Jhonattan Reales-González; Julian Naizaque; Katherine Laiton-Donato; Magdalena Wiesner; Marcela Mercado-Reyes; María T. Herrera-Sepúlveda; Martha Lucia Ospina Martínez; Sheryll Corchuelo                                                                                                                                                                                                         |
| EPI_ISL_3355483, EPI_ISL_3355484, EPI_ISL_3355485, EPI_ISL_3369934                                                                                                                                                                                                                                                                | FUNDACIÓN HOSPITAL SAN PEDRO                                  | Corporacion CorpoGen-Universidad de los Andes-Universidad Central                                                                                                                                                                                      | Christian Romero; Jorge Duitama; Juan Manuel Anzola; Laura González; Maryam Chaib De Mares; María Mercedes Zambrano; Nelly Díaz; Patricia Del Portillo; Silvia Restrepo                                                                                                                                                                                                                                                                                                                                              |
| EPI_ISL_3065505                                                                                                                                                                                                                                                                                                                   | FUNDACIÓN VALLE DEL LILI                                      | Laboratorio de Biotecnología, Universidad Icesi                                                                                                                                                                                                        | Andrés M. Castillo-Giraldo; Beatriz Parra; Diana López-Álvarez; Ludwig Luis Albornoz-Tovar; Marcela Mercado-Reyes; María F. Villegas-Torres; Juan I. Gutiérrez López; Paola A. Caicedo                                                                                                                                                                                                                                                                                                                               |
| EPI_ISL_1494951                                                                                                                                                                                                                                                                                                                   | Fundacion Cardioinfantil                                      | Instituto Nacional de Salud- Dirección de Investigación en Salud Pública                                                                                                                                                                               | Carlos Franco-Muñoz; Carmen Osorio; Diana Malo; Diego A. Álvarez-Díaz; Diego Andrés Prada; Gerardo Santamaría; Hector Alejandro Ruiz-Moreno; Jhonattan Reales-González; Jorge Rivera; Juan Camilo Martínez; Julian Naizaque; Katherine Laiton-Donato; Lisseth Pardo; Magdalena Wiesner; Marcela Mercado-Reyes; María T. Herrera-Sepúlveda; Marta Lopez Blanco; Martha Lucia Ospina Martínez; Paola Rojas; Sergio Gomez; Sheryll Corchuelo; Ángela Alarcon Cruz                                                       |
| EPI_ISL_794649, EPI_ISL_794650, EPI_ISL_794651, EPI_ISL_794662                                                                                                                                                                                                                                                                    | Fundación Cardio Infantil                                     | Instituto Nacional de Salud - Dirección de Investigación en Salud Pública                                                                                                                                                                              | Carlos Franco-Muñoz; Diego A. Álvarez-Díaz; Diego Andrés Prada; Gerardo Santamaría; Jonathan Reales; Julian Naizaque; Katherine Laiton-Donato; Magdalena Wiesner; Marcela Mercado-Reyes; María T. Herrera; Martha Lucia Ospina Martínez; Mauricio Pacheco-Montealegre; Paola Muñoz-Laiton; Sheryll Corchuelo                                                                                                                                                                                                         |
| EPI_ISL_1137616, EPI_ISL_1137617, EPI_ISL_1201897                                                                                                                                                                                                                                                                                 | Fundación Cardio Infantil                                     | Instituto Nacional de Salud- Dirección de Investigación en Salud Pública                                                                                                                                                                               | Carlos Franco-Muñoz; Diego A. Álvarez-Díaz; Diego Andrés Prada; Gerardo Santamaría; Hector Alejandro Ruiz-Moreno; Jhonattan Reales-González; Julian Naizaque; Katherine Laiton-Donato; Magdalena Wiesner; Marcela Mercado-Reyes.; María T. Herrera-Sepúlveda; Martha Lucia Ospina Martínez; Sheryll Corchuelo                                                                                                                                                                                                        |
| EPI_ISL_794654, EPI_ISL_794655, EPI_ISL_794664, EPI_ISL_794665                                                                                                                                                                                                                                                                    | Fundación Valle del Lili                                      | Instituto Nacional de Salud - Dirección de Investigación en Salud Pública                                                                                                                                                                              | Carlos Franco-Muñoz; Diego A. Álvarez-Díaz; Diego Andrés Prada; Gerardo Santamaría; Jonathan Reales; Julian Naizaque; Katherine Laiton-Donato; Magdalena Wiesner; Marcela Mercado-Reyes; María T. Herrera; Martha Lucia Ospina Martínez; Mauricio Pacheco-Montealegre; Paola Muñoz-Laiton; Sheryll Corchuelo                                                                                                                                                                                                         |



| PERDOMO                                                                                                                                                                                                                                                                                                                                                                                               |                                                            |                                                                                                                                                                                                                                                        |                                                                    |                                                                                                                                                                                                                                                                                                                                                                                                                                                                                     |
|-------------------------------------------------------------------------------------------------------------------------------------------------------------------------------------------------------------------------------------------------------------------------------------------------------------------------------------------------------------------------------------------------------|------------------------------------------------------------|--------------------------------------------------------------------------------------------------------------------------------------------------------------------------------------------------------------------------------------------------------|--------------------------------------------------------------------|-------------------------------------------------------------------------------------------------------------------------------------------------------------------------------------------------------------------------------------------------------------------------------------------------------------------------------------------------------------------------------------------------------------------------------------------------------------------------------------|
| EPI_ISL_3459377, EPI_ISL_3459390, EPI_ISL_3459404, EPI_ISL_3462744                                                                                                                                                                                                                                                                                                                                    | HOSPITAL UNIVERSITARIO HERNANDO MONCALEANO PERDOMO (HUHMP) | Instituto Nacional de Salud                                                                                                                                                                                                                            |                                                                    | Martinez; Julian Naizaque; Katherine Laiton-Donato; Lisseth Pardo; Magdalena Wiesner; Marcela Mercado-Reyes; Maria T. Herrera-Sepúlveda; Marta Lopez Blanco; Martha Lucia Ospina Martinez; Paola Rojas; Sergio Gomez; Sheryll Corchuelo; Ángela Alarcon Cruz                                                                                                                                                                                                                        |
| EPI_ISL_4300693, EPI_ISL_4300695                                                                                                                                                                                                                                                                                                                                                                      | HOSPITAL UNIVERSITARIO HERNANDO MONCALEANO PERDOMO (HUHMP) | Instituto Nacional de Salud- Dirección de Investigación en Salud Pública                                                                                                                                                                               |                                                                    | Carlos Franco-Muñoz; Carmen Osorio; Diana Malo; Diego A. Álvarez-Díaz; Diego Andrés Prada; Gerardo Santamaría; Hector Alejandro Ruiz-Moreno; Jhonnatan Reales-González; Jorge Rivera; Juan Camilo Martinez; Julian Naizaque; Katherine Laiton-Donato; Lisseth Pardo; Magdalena Wiesner; Marcela Mercado-Reyes; Maria T. Herrera-Sepúlveda; Marta Lopez Blanco; Martha Lucia Ospina Martinez; Paola Rojas; Sergio Gomez; Sheryll Corchuelo; Ángela Alarcon Cruz                      |
| EPI_ISL_794659, EPI_ISL_794660                                                                                                                                                                                                                                                                                                                                                                        | HOSPITAL UNIVERSITARIO SAN IGNACIO                         | Instituto Nacional de Salud - Dirección de Investigación en Salud Pública                                                                                                                                                                              |                                                                    | Carlos Franco-Muñoz; Diego A. Álvarez-Díaz; Diego Andrés Prada; Gerardo Santamaría; Jonathan Reales; Julian Naizaque; Katherine Laiton-Donato; Magdalena Wiesner; Marcela Mercado-Reyes; Maria T. Herrera; Martha Lucia Ospina Martinez; Mauricio Pacheco-Montealegre; Paola Muñoz-Laiton; Sheryll Corchuelo                                                                                                                                                                        |
| EPI_ISL_1960043, EPI_ISL_1960044, EPI_ISL_1960062, EPI_ISL_1960073, EPI_ISL_2437999, EPI_ISL_2438000, EPI_ISL_2438001, EPI_ISL_2438002, EPI_ISL_2621174, EPI_ISL_2621175, EPI_ISL_2621176                                                                                                                                                                                                             | HPTU                                                       | Universidad Nacional de Colombia - Laboratorio Genómico One Health                                                                                                                                                                                     |                                                                    | EPI_ISL_2621859, EPI_ISL_2651225, EPI_ISL_2651226, EPI_ISL_3276546, EPI_ISL_3276551, EPI_ISL_3276552, EPI_ISL_3276553, EPI_ISL_3276554                                                                                                                                                                                                                                                                                                                                              |
| see above                                                                                                                                                                                                                                                                                                                                                                                             |                                                            |                                                                                                                                                                                                                                                        |                                                                    | Andres F. Cardona-Rios; Carlos Franco-Muñoz; Carolina Muñoz-Arango; Celeny Ortiz; Daniel O. Maldonado-Perez; Diego A. Álvarez-Díaz; Hector Alejandro Ruiz-Moreno; Idabely Betancur Ortiz; Jorge E. Osorio; Juan P. Hernandez-Ortiz; Karl A Ciuderis; Katherine Laiton-Donato; Laura Silvana Perez; Lina M. Hurtado; Marcela Mercado-Reyes; Maria Angélica Maya; Maria Stella López; Rita Almanza Payares; Sandra Ines Cano; Simón Villegas Velásquez                                |
| EPI_ISL_3320721, EPI_ISL_3320726, EPI_ISL_3320727, EPI_ISL_3320732, EPI_ISL_3320753                                                                                                                                                                                                                                                                                                                   | Hemato Oncologos                                           | Instituto Nacional de Salud                                                                                                                                                                                                                            |                                                                    | Carlos Franco-Muñoz; Carmen Osorio; Diana Malo; Diego A. Álvarez-Díaz; Diego Andrés Prada; Gerardo Santamaría; Hector Alejandro Ruiz-Moreno; Jhonnatan Reales-González; Jorge Rivera; Juan Camilo Martinez; Julian Naizaque; Katherine Laiton-Donato; Lisseth Pardo; Magdalena Wiesner; Marcela Mercado-Reyes; Maria T. Herrera-Sepúlveda; Marta Lopez Blanco; Martha Lucia Ospina Martinez; Paola Rojas; Sergio Gomez; Sheryll Corchuelo; Ángela Alarcon Cruz                      |
| EPI_ISL_1017112                                                                                                                                                                                                                                                                                                                                                                                       | Hemato Oncologos S.A                                       | Instituto Nacional de Salud- Dirección de Investigación en Salud Pública                                                                                                                                                                               |                                                                    | Carlos Franco-Muñoz; Diego A. Álvarez-Díaz; Diego Andrés Prada; Gerardo Santamaría; Hector Alejandro Ruiz-Moreno; Jhonnatan Reales-González; Julian Naizaque; Katherine Laiton-Donato; Magdalena Wiesner; Marcela Mercado-Reyes; Maria T. Herrera-Sepúlveda; Martha Lucia Ospina Martinez; Sheryll Corchuelo                                                                                                                                                                        |
| EPI_ISL_3391982                                                                                                                                                                                                                                                                                                                                                                                       | Hospital Regional de Zipaquira                             | Instituto Nacional de Salud- Dirección de Investigación en Salud Pública                                                                                                                                                                               |                                                                    | Carlos Franco-Muñoz; Carmen Osorio; Diana Malo; Diego A. Álvarez-Díaz; Diego Andrés Prada; Gerardo Santamaría; Hector Alejandro Ruiz-Moreno; Jhonnatan Reales-González; Jorge Rivera; Juan Camilo Martinez; Julian Naizaque; Katherine Laiton-Donato; Lisseth Pardo; Magdalena Wiesner; Marcela Mercado-Reyes; Maria T. Herrera-Sepúlveda; Marta Lopez Blanco; Martha Lucia Ospina Martinez; Paola Rojas; Sergio Gomez; Sheryll Corchuelo; Ángela Alarcon Cruz                      |
| EPI_ISL_1091919, EPI_ISL_1091920, EPI_ISL_1091921                                                                                                                                                                                                                                                                                                                                                     | Hospital Departamental María Inmaculada                    | Instituto Nacional de Salud- Dirección de Investigación en Salud Pública                                                                                                                                                                               |                                                                    | Carlos Franco-Muñoz; Diego A. Álvarez-Díaz; Diego Andrés Prada; Gerardo Santamaría; Hector Alejandro Ruiz-Moreno; Jhonnatan Reales-González; Julian Naizaque; Katherine Laiton-Donato; Magdalena Wiesner; Marcela Mercado-Reyes; Maria T. Herrera-Sepúlveda; Martha Lucia Ospina Martinez; Sheryll Corchuelo                                                                                                                                                                        |
| EPI_ISL_3671000, EPI_ISL_3671012, EPI_ISL_3671013, EPI_ISL_3671057                                                                                                                                                                                                                                                                                                                                    | Hospital Fundacion San Vicente de Paul                     | Universidad Nacional de Colombia - Laboratorio Genómico One Health                                                                                                                                                                                     |                                                                    | Andres F. Cardona-Rios; Carlos Franco-Muñoz; Carolina Muñoz-Arango; Celeny Ortiz; Daniel O. Maldonado-Perez; Diego A. Álvarez-Díaz; Hector Alejandro Ruiz-Moreno; Idabely Betancur Ortiz; Jorge E. Osorio; Juan P. Hernandez-Ortiz; Karl A Ciuderis; Katherine Laiton-Donato; Laura Silvana Perez; Lina M. Hurtado; Marcela Mercado-Reyes; Maria Angélica Maya; Maria Stella López; Rita Almanza Payares; Sandra Ines Cano; Simón Villegas Velásquez                                |
| EPI_ISL_3332697                                                                                                                                                                                                                                                                                                                                                                                       | Hospital Pablo Tobon                                       | Corporación para Investigaciones Biológicas-CIB                                                                                                                                                                                                        |                                                                    | Jeanneth Mosquera Rendon; Jenny Santiago Cuesta; Marcela Mercado Reyes; Uriel A. Hurtado Paez                                                                                                                                                                                                                                                                                                                                                                                       |
| EPI_ISL_3671058, EPI_ISL_3671065, EPI_ISL_3721574, EPI_ISL_3721593, EPI_ISL_3721595, EPI_ISL_3721602, EPI_ISL_3721618                                                                                                                                                                                                                                                                                 | Hospital Pablo Tobon                                       | Universidad Nacional de Colombia - Laboratorio Genómico One Health                                                                                                                                                                                     |                                                                    | Andres F. Cardona-Rios; Carlos Franco-Muñoz; Carolina Muñoz-Arango; Celeny Ortiz; Daniel O. Maldonado-Perez; Diego A. Álvarez-Díaz; Hector Alejandro Ruiz-Moreno; Idabely Betancur Ortiz; Jorge E. Osorio; Juan P. Hernandez-Ortiz; Karl A Ciuderis; Katherine Laiton-Donato; Laura Silvana Perez; Lina M. Hurtado; Marcela Mercado-Reyes; Maria Angélica Maya; Maria Stella López; Rita Almanza Payares; Sandra Ines Cano; Simón Villegas Velásquez                                |
| see above                                                                                                                                                                                                                                                                                                                                                                                             |                                                            |                                                                                                                                                                                                                                                        |                                                                    |                                                                                                                                                                                                                                                                                                                                                                                                                                                                                     |
| EPI_ISL_1015358, EPI_ISL_1015359, EPI_ISL_1015360, EPI_ISL_1629716, EPI_ISL_1675294, EPI_ISL_1675295, EPI_ISL_1675296, EPI_ISL_1675297, EPI_ISL_1675298, EPI_ISL_1675326, EPI_ISL_1675327                                                                                                                                                                                                             | Hospital Pablo Tobón Uribe                                 | Universidad Nacional de Colombia - Laboratorio Genómico One Health                                                                                                                                                                                     |                                                                    | EPI_ISL_1675328, EPI_ISL_1675329, EPI_ISL_1675330                                                                                                                                                                                                                                                                                                                                                                                                                                   |
| see above                                                                                                                                                                                                                                                                                                                                                                                             |                                                            |                                                                                                                                                                                                                                                        |                                                                    | Andres F. Cardona-Rios; Carlos Franco-Muñoz; Daniel O. Maldonado-Perez; Diego A. Álvarez-Díaz; Eliana Patricia Calvo Tapiero; Hector Alejandro Ruiz-Moreno; Idabely Betancur Ortiz; Jorge E. Osorio; Juan P. Hernandez-Ortiz; Karl A Ciuderis; Katherine Laiton-Donato; Laura Silvana Perez; Lina M. Hurtado; Marcela Mercado-Reyes; Maria Angélica Maya; Maria Stella López; Rita Almanza Payares; Sandra Ines Cano; Simón Villegas Velásquez                                      |
| EPI_ISL_3320718, EPI_ISL_3320723                                                                                                                                                                                                                                                                                                                                                                      | Hospital Regional de la Orinoquia -HORO                    | Instituto Nacional de Salud                                                                                                                                                                                                                            |                                                                    | Carlos Franco-Muñoz; Carmen Osorio; Diana Malo; Diego A. Álvarez-Díaz; Diego Andrés Prada; Gerardo Santamaría; Hector Alejandro Ruiz-Moreno; Jhonnatan Reales-González; Jorge Rivera; Juan Camilo Martinez; Julian Naizaque; Katherine Laiton-Donato; Lisseth Pardo; Magdalena Wiesner; Marcela Mercado-Reyes; Maria T. Herrera-Sepúlveda; Marta Lopez Blanco; Martha Lucia Ospina Martinez; Paola Rojas; Sergio Gomez; Sheryll Corchuelo; Ángela Alarcon Cruz                      |
| EPI_ISL_2674328                                                                                                                                                                                                                                                                                                                                                                                       | Hospital Regional de Zipaquira                             | Instituto Nacional de Salud- Dirección de Investigación en Salud Pública                                                                                                                                                                               |                                                                    | Carlos Franco-Muñoz; Carmen Osorio; Diana Malo; Diego A. Álvarez-Díaz; Diego Andrés Prada; Gerardo Santamaría; Hector Alejandro Ruiz-Moreno; Jhonnatan Reales-González; Jorge Rivera; Juan Camilo Martinez; Julian Naizaque; Katherine Laiton-Donato; Lisseth Pardo; Magdalena Wiesner; Marcela Mercado-Reyes; Maria T. Herrera-Sepúlveda; Marta Lopez Blanco; Martha Lucia Ospina Martinez; Paola Rojas; Sergio Gomez; Sheryll Corchuelo; Ángela Alarcon Cruz                      |
| EPI_ISL_906532                                                                                                                                                                                                                                                                                                                                                                                        | Hospital San Jose de Maicao                                | Instituto Nacional de Salud- Dirección de Investigación en Salud Pública, Universidad de los Andes- Applied genomics research group, Vicerrectoria de Investigación y Creación, Universidad de los Andes- Systems and Computing Engineering Department |                                                                    | Carlos Franco-Muñoz; Diego A. Álvarez-Díaz; Diego Andrés Prada; Gerardo Santamaría Jorge Duitama; Héctor Alejandro Ruiz-Moreno; Jhonnatan Reales-González; Jorge Ivan Diaz; Julian Naizaque; Katherine Laiton-Donato; Laura Natalia Gonzalez; Magdalena Wiesner; Marcela Mercado-Reyes; Maria T. Herrera-Sepúlveda; Martha Lucia Ospina Martinez; Mauricio Pacheco-Montealegre; Sheryll Corchuelo; Silvia Restrepo-Restrepo                                                         |
| EPI_ISL_1017706, EPI_ISL_1017707, EPI_ISL_1017708, EPI_ISL_1017709, EPI_ISL_1017710                                                                                                                                                                                                                                                                                                                   | Hospital Universitario Hernando Moncaleano Perdomo         | Instituto Nacional de Salud- Dirección de Investigación en Salud Pública                                                                                                                                                                               |                                                                    | Carlos Franco-Muñoz; Diego A. Álvarez-Díaz; Diego Andrés Prada; Gerardo Santamaría; Hector Alejandro Ruiz-Moreno; Jhonnatan Reales-González; Julian Naizaque; Katherine Laiton-Donato; Magdalena Wiesner; Marcela Mercado-Reyes; Maria T. Herrera-Sepúlveda; Martha Lucia Ospina Martinez; Sheryll Corchuelo                                                                                                                                                                        |
| EPI_ISL_1220047                                                                                                                                                                                                                                                                                                                                                                                       | Hospital Universitario de San Rafael de Tunja              | Instituto Nacional de Salud- Dirección de Investigación en Salud Pública                                                                                                                                                                               |                                                                    | Carlos Franco-Muñoz; Diego A. Álvarez-Díaz; Diego Andrés Prada; Gerardo Santamaría; Hector Alejandro Ruiz-Moreno; Jhonnatan Reales-González; Julian Naizaque; Katherine Laiton-Donato; Magdalena Wiesner; Marcela Mercado-Reyes; Maria T. Herrera-Sepúlveda; Martha Lucia Ospina Martinez; Sheryll Corchuelo                                                                                                                                                                        |
| EPI_ISL_4419183                                                                                                                                                                                                                                                                                                                                                                                       | Hospital Universitario del Valle- Evaristo Garcia          | Universidad del Valle                                                                                                                                                                                                                                  |                                                                    | Programa Nacional de Caracterización Genómica de SARS-CoV-2                                                                                                                                                                                                                                                                                                                                                                                                                         |
| EPI_ISL_1091779, EPI_ISL_1091780, EPI_ISL_1091781, EPI_ISL_1629717, EPI_ISL_1629718, EPI_ISL_1629719, EPI_ISL_1629720, EPI_ISL_1675293, EPI_ISL_1675313, EPI_ISL_1675314, EPI_ISL_1675331, EPI_ISL_1675332                                                                                                                                                                                            | ICMT                                                       | Universidad Nacional de Colombia - Laboratorio Genómico One Health                                                                                                                                                                                     |                                                                    | EPI_ISL_1824700, EPI_ISL_1824702, EPI_ISL_1824703, EPI_ISL_1824709, EPI_ISL_1824710, EPI_ISL_2321573, EPI_ISL_2321574, EPI_ISL_2321575                                                                                                                                                                                                                                                                                                                                              |
| see above                                                                                                                                                                                                                                                                                                                                                                                             |                                                            |                                                                                                                                                                                                                                                        |                                                                    | Andres F. Cardona-Rios; Carlos Franco-Muñoz; Carolina Muñoz-Arango; Celeny Ortiz; Daniel O. Maldonado-Perez; Diego A. Álvarez-Díaz; Eliana Patricia Calvo Tapiero; Hector Alejandro Ruiz-Moreno; Idabely Betancur Ortiz; Jorge E. Osorio; Juan P. Hernandez-Ortiz; Karl A Ciuderis; Katherine Laiton-Donato; Laura Silvana Perez; Lina M. Hurtado; Marcela Mercado-Reyes; Maria Angélica Maya; Maria Stella López; Rita Almanza Payares; Sandra Ines Cano; Simón Villegas Velásquez |
| EPI_ISL_1960050, EPI_ISL_1960054, EPI_ISL_1960074, EPI_ISL_1960079, EPI_ISL_2136274, EPI_ISL_2321589, EPI_ISL_2321590, EPI_ISL_2321591, EPI_ISL_2621161, EPI_ISL_2621162, EPI_ISL_2621163, EPI_ISL_2621164, EPI_ISL_2621165, EPI_ISL_2621166, EPI_ISL_2621167, EPI_ISL_2621168, EPI_ISL_2621169, EPI_ISL_2621170, EPI_ISL_2621171, EPI_ISL_2621172, EPI_ISL_2621173, EPI_ISL_2621884                  | ICMT-APARTADO                                              | Universidad Nacional de Colombia - Laboratorio Genómico One Health                                                                                                                                                                                     |                                                                    | Andres F. Cardona-Rios; Carlos Franco-Muñoz; Carolina Muñoz-Arango; Celeny Ortiz; Daniel O. Maldonado-Perez; Diego A. Álvarez-Díaz; Hector Alejandro Ruiz-Moreno; Idabely Betancur Ortiz; Jorge E. Osorio; Juan P. Hernandez-Ortiz; Karl A Ciuderis; Katherine Laiton-Donato; Laura Silvana Perez; Lina M. Hurtado; Marcela Mercado-Reyes; Maria Angélica Maya; Maria Stella López; Rita Almanza Payares; Sandra Ines Cano; Simón Villegas Velásquez                                |
| EPI_ISL_3276628, EPI_ISL_3276629, EPI_ISL_3276630, EPI_ISL_3276631, EPI_ISL_3276632, EPI_ISL_3276633, EPI_ISL_3276634, EPI_ISL_3276635, EPI_ISL_3276636, EPI_ISL_3276637, EPI_ISL_3276638, EPI_ISL_3276639, EPI_ISL_3276640, EPI_ISL_3276641, EPI_ISL_3276642, EPI_ISL_3721578, EPI_ISL_3721579, EPI_ISL_3721580, EPI_ISL_3721594, EPI_ISL_3721606, EPI_ISL_3721609, EPI_ISL_3721616, EPI_ISL_3721624 | ICMT-Apartado                                              | Universidad Nacional de Colombia - Laboratorio Genómico One Health                                                                                                                                                                                     |                                                                    | Andres F. Cardona-Rios; Carlos Franco-Muñoz; Carolina Muñoz-Arango; Celeny Ortiz; Daniel O. Maldonado-Perez; Diego A. Álvarez-Díaz; Hector Alejandro Ruiz-Moreno; Idabely Betancur Ortiz; Jorge E. Osorio; Juan P. Hernandez-Ortiz; Karl A Ciuderis; Katherine Laiton-Donato; Laura Silvana Perez; Lina M. Hurtado; Marcela Mercado-Reyes; Maria Angélica Maya; Maria Stella López; Rita Almanza Payares; Sandra Ines Cano; Simón Villegas Velásquez                                |
| see above                                                                                                                                                                                                                                                                                                                                                                                             |                                                            |                                                                                                                                                                                                                                                        |                                                                    | Andres F. Cardona-Rios; Carlos Franco-Muñoz; Carolina Muñoz-Arango; Celeny Ortiz; Daniel O. Maldonado-Perez; Diego A. Álvarez-Díaz; Hector Alejandro Ruiz-Moreno; Idabely Betancur Ortiz; Jorge E. Osorio; Juan P. Hernandez-Ortiz; Karl A Ciuderis; Katherine Laiton-Donato; Laura Silvana Perez; Lina M. Hurtado; Marcela Mercado-Reyes; Maria Angélica Maya; Maria Stella López; Rita Almanza Payares; Sandra Ines Cano; Simón Villegas Velásquez                                |
| EPI_ISL_2621157, EPI_ISL_2621158, EPI_ISL_2621159, EPI_ISL_2621160, EPI_ISL_2651224                                                                                                                                                                                                                                                                                                                   | ICMT-SABANETA                                              | Universidad Nacional de Colombia - Laboratorio Genómico One Health                                                                                                                                                                                     |                                                                    | Andres F. Cardona-Rios; Carlos Franco-Muñoz; Carolina Muñoz-Arango; Celeny Ortiz; Daniel O. Maldonado-Perez; Diego A. Álvarez-Díaz; Hector Alejandro Ruiz-Moreno; Idabely Betancur Ortiz; Jorge E. Osorio; Juan P. Hernandez-Ortiz; Karl A Ciuderis; Katherine Laiton-Donato; Laura Silvana Perez; Lina M. Hurtado; Marcela Mercado-Reyes; Maria Angélica Maya; Maria Stella López; Rita Almanza Payares; Sandra Ines Cano; Simón Villegas Velásquez                                |
| EPI_ISL_4198462, EPI_ISL_4198463, EPI_ISL_4198464, EPI_ISL_4198465, EPI_ISL_4198466, EPI_ISL_4198467, EPI_ISL_4198468, EPI_ISL_4198469, EPI_ISL_4198470, EPI_ISL_4198471, EPI_ISL_4198472, EPI_ISL_4198473, EPI_ISL_4198474, EPI_ISL_4198475, EPI_ISL_4198476, EPI_ISL_4198477, EPI_ISL_4198478, EPI_ISL_4198479, EPI_ISL_4198480, EPI_ISL_4198481                                                    | IDIME                                                      | Gencore - Universidad de los Andes                                                                                                                                                                                                                     |                                                                    | Cristian Barrera; David González; Gabriela Ariza; Luisa Sacristan; Marcela Guevara; Marcela Mercado; Silvia Restrepo                                                                                                                                                                                                                                                                                                                                                                |
| EPI_ISL_845630, EPI_ISL_845631, EPI_ISL_845632, EPI_ISL_845633                                                                                                                                                                                                                                                                                                                                        | IDIME S.A                                                  | Instituto Nacional de Salud - Dirección de Investigación en Salud Pública                                                                                                                                                                              |                                                                    | Carlos Franco-Muñoz; Diego A. Álvarez-Díaz; Gerardo Santamaría; Jonathan Reales; Julian Naizaque; Katherine Laiton-Donato; Magdalena Wiesner; Marcela Mercado-Reyes; Maria T. Herrera-Sepúlveda; Martha Lucia Ospina Martinez; Mauricio Pacheco-Montealegre; Paola Muñoz-Laiton; Sheryll Corchuelo                                                                                                                                                                                  |
| EPI_ISL_3459395, EPI_ISL_3459416, EPI_ISL_3459417                                                                                                                                                                                                                                                                                                                                                     | IDIME-CLINICA NUEVA DE CALI                                | Instituto Nacional de Salud                                                                                                                                                                                                                            |                                                                    | Carlos Franco-Muñoz; Carmen Osorio; Diana Malo; Diego A. Álvarez-Díaz; Diego Andrés Prada; Gerardo Santamaría; Hector Alejandro Ruiz-Moreno; Jhonnatan Reales-González; Jorge Rivera; Juan Camilo Martinez; Julian Naizaque; Katherine Laiton-Donato; Lisseth Pardo; Magdalena Wiesner; Marcela Mercado-Reyes; Maria T. Herrera-Sepúlveda; Marta Lopez Blanco; Martha Lucia Ospina Martinez; Paola Rojas; Sergio Gomez; Sheryll Corchuelo; Ángela Alarcon Cruz                      |
| EPI_ISL_1820961, EPI_ISL_2155041                                                                                                                                                                                                                                                                                                                                                                      | IMAT                                                       | Instituto Nacional de Salud- Dirección de Investigación en Salud Pública                                                                                                                                                                               |                                                                    | Carlos Franco-Muñoz; Carmen Osorio; Diana Malo; Diego A. Álvarez-Díaz; Diego Andrés Prada; Gerardo Santamaría; Hector Alejandro Ruiz-Moreno; Jhonnatan Reales-González; Jorge Rivera; Juan Camilo Martinez; Julian Naizaque; Katherine Laiton-Donato; Lisseth Pardo; Magdalena Wiesner; Marcela Mercado-Reyes; Maria T. Herrera-Sepúlveda; Marta Lopez Blanco; Martha Lucia Ospina Martinez; Paola Rojas; Sergio Gomez; Sheryll Corchuelo; Ángela Alarcon Cruz                      |
| EPI_ISL_2827770, EPI_ISL_2827772, EPI_ISL_2827774, EPI_ISL_2827780, EPI_ISL_2827784, EPI_ISL_3391978, EPI_ISL_3391981, EPI_ISL_3391984, EPI_ISL_3391985, EPI_ISL_3391986                                                                                                                                                                                                                              | IMAT S.A.S.                                                | Instituto Nacional de Salud- Dirección de Investigación en Salud Pública                                                                                                                                                                               |                                                                    | Carlos Franco-Muñoz; Carmen Osorio; Diana Malo; Diego A. Álvarez-Díaz; Diego Andrés Prada; Gerardo Santamaría; Hector Alejandro Ruiz-Moreno; Jhonnatan Reales-González; Jorge Rivera; Juan Camilo Martinez; Julian Naizaque; Katherine Laiton-Donato; Lisseth Pardo; Magdalena Wiesner; Marcela Mercado-Reyes; Maria T. Herrera-Sepúlveda; Marta Lopez Blanco; Martha Lucia Ospina Martinez; Paola Rojas; Sergio Gomez; Sheryll Corchuelo; Ángela Alarcon Cruz                      |
| see above                                                                                                                                                                                                                                                                                                                                                                                             |                                                            |                                                                                                                                                                                                                                                        |                                                                    |                                                                                                                                                                                                                                                                                                                                                                                                                                                                                     |
| EPI_ISL_3459414                                                                                                                                                                                                                                                                                                                                                                                       | INS                                                        | Instituto Nacional de Salud                                                                                                                                                                                                                            |                                                                    | Carlos Franco-Muñoz; Carmen Osorio; Diana Malo; Diego A. Álvarez-Díaz; Diego Andrés Prada; Gerardo Santamaría; Hector Alejandro Ruiz-Moreno; Jhonnatan Reales-González; Jorge Rivera; Juan Camilo Martinez; Julian Naizaque; Katherine Laiton-Donato; Lisseth Pardo; Magdalena Wiesner; Marcela Mercado-Reyes; Maria T. Herrera-Sepúlveda; Marta Lopez Blanco; Martha Lucia Ospina Martinez; Paola Rojas; Sergio Gomez; Sheryll Corchuelo; Ángela Alarcon Cruz                      |
| EPI_ISL_2674342, EPI_ISL_2674343, EPI_ISL_2674345                                                                                                                                                                                                                                                                                                                                                     | IPS YENNY ZORAYA SALAZAR                                   | Instituto Nacional de Salud- Dirección de Investigación en Salud Pública                                                                                                                                                                               |                                                                    | Carlos Franco-Muñoz; Carmen Osorio; Diana Malo; Diego A. Álvarez-Díaz; Diego Andrés Prada; Gerardo Santamaría; Hector Alejandro Ruiz-Moreno; Jhonnatan Reales-González; Jorge Rivera; Juan Camilo Martinez; Julian Naizaque; Katherine Laiton-Donato; Lisseth Pardo; Magdalena Wiesner; Marcela Mercado-Reyes; Maria T. Herrera-Sepúlveda; Marta Lopez Blanco; Martha Lucia Ospina Martinez; Paola Rojas; Sergio Gomez; Sheryll Corchuelo; Ángela Alarcon Cruz                      |
| EPI_ISL_3721577, EPI_ISL_3721585, EPI_ISL_3721587, EPI_ISL_3721600, EPI_ISL_3721608, EPI_ISL_3721610, EPI_ISL_3721614, EPI_ISL_3721619, EPI_ISL_3721620                                                                                                                                                                                                                                               | see above                                                  | Instituto Colombiano Medicina Tropical ICMT - Sede Sabaneta                                                                                                                                                                                            | Universidad Nacional de Colombia - Laboratorio Genómico One Health | Andres F. Cardona-Rios; Carlos Franco-Muñoz; Carolina Muñoz-Arango; Celeny Ortiz; Daniel O. Maldonado-Perez; Diego A. Álvarez-Díaz; Hector Alejandro Ruiz-Moreno; Idabely Betancur Ortiz; Jorge E. Osorio; Juan P. Hernandez-Ortiz; Karl A Ciuderis; Katherine Laiton-Donato; Laura Silvana Perez; Lina M. Hurtado; Marcela Mercado-Reyes; Maria Angélica Maya; Maria Stella López; Rita Almanza Payares; Sandra Ines Cano; Simón Villegas Velásquez                                |

|                                                                                                                                                                                                                                                                                                                                                                                                                                                                                                                                                                                                                                                                                                                                                                                                                                                                                                                                                                                                                                                                                                                                                                                                                                                                                                                                                                                                                                                                                                                                                                                                                                                                                                                                                                                                                                                                                                                                                                                                                                                                                                                                                                                                                                                                                                                                                                                                                                                                                                                                                                                                                                                                                                                                                                                                                                                                                                                                                                                                                                                                                                                                                                                                                                                                                                                                                                                                                                                                                                                                                                                                                                                                                                                                                                                                                                                                                                                                                                                                                                                                                                                                                                                                                                                                                                                                                                                                                                                                                                                                                                                                                                                                                                                                                                                                                                                                                                                                                                                                                                                                                                                                                                                                                                                                                                                                                                                                                                                                                                                                                                                                                                                                                                                                                                                                                                                                                                                                                                                                                                                                                                                                                                                                                                                                                                                                                                                                                                                                                                                                                                                                                                                                                                                                                                                                                                                                                                                                                                                                                                                                                                                                                                                                                                                                                                                                                                                                                                                                                                                                                                                                                                                                                                                                                                                                                                                                                                                                                                                                                                                                                                                                                                                                                                                                                                                                                                                                                                                                                                                                                                                                                                                                                                                                                                                                                                                                                                                                                                                                                                                                                                                                                                                                                                                                                                                                                                                                                                                                                                           |                                                                           |                                                                                                                                                                                                                                                                                                                                                                                                                                                                                                                                                                      |                                                                                                                                                                                                                                                                                                                                                                                                                                                                |
|-----------------------------------------------------------------------------------------------------------------------------------------------------------------------------------------------------------------------------------------------------------------------------------------------------------------------------------------------------------------------------------------------------------------------------------------------------------------------------------------------------------------------------------------------------------------------------------------------------------------------------------------------------------------------------------------------------------------------------------------------------------------------------------------------------------------------------------------------------------------------------------------------------------------------------------------------------------------------------------------------------------------------------------------------------------------------------------------------------------------------------------------------------------------------------------------------------------------------------------------------------------------------------------------------------------------------------------------------------------------------------------------------------------------------------------------------------------------------------------------------------------------------------------------------------------------------------------------------------------------------------------------------------------------------------------------------------------------------------------------------------------------------------------------------------------------------------------------------------------------------------------------------------------------------------------------------------------------------------------------------------------------------------------------------------------------------------------------------------------------------------------------------------------------------------------------------------------------------------------------------------------------------------------------------------------------------------------------------------------------------------------------------------------------------------------------------------------------------------------------------------------------------------------------------------------------------------------------------------------------------------------------------------------------------------------------------------------------------------------------------------------------------------------------------------------------------------------------------------------------------------------------------------------------------------------------------------------------------------------------------------------------------------------------------------------------------------------------------------------------------------------------------------------------------------------------------------------------------------------------------------------------------------------------------------------------------------------------------------------------------------------------------------------------------------------------------------------------------------------------------------------------------------------------------------------------------------------------------------------------------------------------------------------------------------------------------------------------------------------------------------------------------------------------------------------------------------------------------------------------------------------------------------------------------------------------------------------------------------------------------------------------------------------------------------------------------------------------------------------------------------------------------------------------------------------------------------------------------------------------------------------------------------------------------------------------------------------------------------------------------------------------------------------------------------------------------------------------------------------------------------------------------------------------------------------------------------------------------------------------------------------------------------------------------------------------------------------------------------------------------------------------------------------------------------------------------------------------------------------------------------------------------------------------------------------------------------------------------------------------------------------------------------------------------------------------------------------------------------------------------------------------------------------------------------------------------------------------------------------------------------------------------------------------------------------------------------------------------------------------------------------------------------------------------------------------------------------------------------------------------------------------------------------------------------------------------------------------------------------------------------------------------------------------------------------------------------------------------------------------------------------------------------------------------------------------------------------------------------------------------------------------------------------------------------------------------------------------------------------------------------------------------------------------------------------------------------------------------------------------------------------------------------------------------------------------------------------------------------------------------------------------------------------------------------------------------------------------------------------------------------------------------------------------------------------------------------------------------------------------------------------------------------------------------------------------------------------------------------------------------------------------------------------------------------------------------------------------------------------------------------------------------------------------------------------------------------------------------------------------------------------------------------------------------------------------------------------------------------------------------------------------------------------------------------------------------------------------------------------------------------------------------------------------------------------------------------------------------------------------------------------------------------------------------------------------------------------------------------------------------------------------------------------------------------------------------------------------------------------------------------------------------------------------------------------------------------------------------------------------------------------------------------------------------------------------------------------------------------------------------------------------------------------------------------------------------------------------------------------------------------------------------------------------------------------------------------------------------------------------------------------------------------------------------------------------------------------------------------------------------------------------------------------------------------------------------------------------------------------------------------------------------------------------------------------------------------------------------------------------------------------------------------------------------------------------------------------------------------------------------------------------------------------------------------------------------------------------------------------------------------------------------------------------------------------------------------------------------------------------------------------------------------------------------------------------------------------------------------------------------------------------------------------------------------------------------------------------------------------------------------------------------------------------------------------------------------------------------------------------------------------------------------------------------------------------------------------------------------------------------------------------------------------------------------------------------------------------------------------------------------------------------------------------------------------------------------------------------------------------------------------|---------------------------------------------------------------------------|----------------------------------------------------------------------------------------------------------------------------------------------------------------------------------------------------------------------------------------------------------------------------------------------------------------------------------------------------------------------------------------------------------------------------------------------------------------------------------------------------------------------------------------------------------------------|----------------------------------------------------------------------------------------------------------------------------------------------------------------------------------------------------------------------------------------------------------------------------------------------------------------------------------------------------------------------------------------------------------------------------------------------------------------|
| EPI_ISL_3276643                                                                                                                                                                                                                                                                                                                                                                                                                                                                                                                                                                                                                                                                                                                                                                                                                                                                                                                                                                                                                                                                                                                                                                                                                                                                                                                                                                                                                                                                                                                                                                                                                                                                                                                                                                                                                                                                                                                                                                                                                                                                                                                                                                                                                                                                                                                                                                                                                                                                                                                                                                                                                                                                                                                                                                                                                                                                                                                                                                                                                                                                                                                                                                                                                                                                                                                                                                                                                                                                                                                                                                                                                                                                                                                                                                                                                                                                                                                                                                                                                                                                                                                                                                                                                                                                                                                                                                                                                                                                                                                                                                                                                                                                                                                                                                                                                                                                                                                                                                                                                                                                                                                                                                                                                                                                                                                                                                                                                                                                                                                                                                                                                                                                                                                                                                                                                                                                                                                                                                                                                                                                                                                                                                                                                                                                                                                                                                                                                                                                                                                                                                                                                                                                                                                                                                                                                                                                                                                                                                                                                                                                                                                                                                                                                                                                                                                                                                                                                                                                                                                                                                                                                                                                                                                                                                                                                                                                                                                                                                                                                                                                                                                                                                                                                                                                                                                                                                                                                                                                                                                                                                                                                                                                                                                                                                                                                                                                                                                                                                                                                                                                                                                                                                                                                                                                                                                                                                                                                                                                                           | Instituto Colombiano de Medicina Tropical - Apartadó                      | Universidad Nacional de Colombia - Laboratorio Genómico One Health                                                                                                                                                                                                                                                                                                                                                                                                                                                                                                   | Andrés F. Cardona-Ríos; Carlos Franco-Muñoz; Carolina Muñoz-Orango; Celery Ortiz; Daniel O. Maldonado-Pérez; Diego A. Álvarez-Díaz; Hector Alejandro Ruiz-Moreno; Idabely Betancur Ortiz; Jorge E. Osorio; Juan P. Hernandez-Ortiz; Karl A Ciuderes; Karina Katherine Laiton-Donato; Laura Silvana Perez; Lima M. Hurtado; Marcela Mercado-Reyes; María Alejandra Maya; María Stella López; Rita Almazán Payares; Sandra Ines Cano; Simón Villegas Velásquez   |
| EPI_ISL_1015735                                                                                                                                                                                                                                                                                                                                                                                                                                                                                                                                                                                                                                                                                                                                                                                                                                                                                                                                                                                                                                                                                                                                                                                                                                                                                                                                                                                                                                                                                                                                                                                                                                                                                                                                                                                                                                                                                                                                                                                                                                                                                                                                                                                                                                                                                                                                                                                                                                                                                                                                                                                                                                                                                                                                                                                                                                                                                                                                                                                                                                                                                                                                                                                                                                                                                                                                                                                                                                                                                                                                                                                                                                                                                                                                                                                                                                                                                                                                                                                                                                                                                                                                                                                                                                                                                                                                                                                                                                                                                                                                                                                                                                                                                                                                                                                                                                                                                                                                                                                                                                                                                                                                                                                                                                                                                                                                                                                                                                                                                                                                                                                                                                                                                                                                                                                                                                                                                                                                                                                                                                                                                                                                                                                                                                                                                                                                                                                                                                                                                                                                                                                                                                                                                                                                                                                                                                                                                                                                                                                                                                                                                                                                                                                                                                                                                                                                                                                                                                                                                                                                                                                                                                                                                                                                                                                                                                                                                                                                                                                                                                                                                                                                                                                                                                                                                                                                                                                                                                                                                                                                                                                                                                                                                                                                                                                                                                                                                                                                                                                                                                                                                                                                                                                                                                                                                                                                                                                                                                                                                           | Instituto Nacional de Cancerología                                        | Instituto Nacional de Salud                                                                                                                                                                                                                                                                                                                                                                                                                                                                                                                                          | Carlos Franco-Muñoz; Diego A. Álvarez-Díaz; Diego Andrés Prada; Gerardo Santamaría; Hector Alejandro Ruiz-Moreno; Jhonattan Reales-González; Julian Naizaque; Katherine Laiton-Donato; Magdalena Wiesner; Marcela Mercado-Reyes; María T. Herrera-Sepúlveda; Martha Lucia Ospina Martínez; Sheryll Corchuelo                                                                                                                                                   |
| EPI_ISL_845634                                                                                                                                                                                                                                                                                                                                                                                                                                                                                                                                                                                                                                                                                                                                                                                                                                                                                                                                                                                                                                                                                                                                                                                                                                                                                                                                                                                                                                                                                                                                                                                                                                                                                                                                                                                                                                                                                                                                                                                                                                                                                                                                                                                                                                                                                                                                                                                                                                                                                                                                                                                                                                                                                                                                                                                                                                                                                                                                                                                                                                                                                                                                                                                                                                                                                                                                                                                                                                                                                                                                                                                                                                                                                                                                                                                                                                                                                                                                                                                                                                                                                                                                                                                                                                                                                                                                                                                                                                                                                                                                                                                                                                                                                                                                                                                                                                                                                                                                                                                                                                                                                                                                                                                                                                                                                                                                                                                                                                                                                                                                                                                                                                                                                                                                                                                                                                                                                                                                                                                                                                                                                                                                                                                                                                                                                                                                                                                                                                                                                                                                                                                                                                                                                                                                                                                                                                                                                                                                                                                                                                                                                                                                                                                                                                                                                                                                                                                                                                                                                                                                                                                                                                                                                                                                                                                                                                                                                                                                                                                                                                                                                                                                                                                                                                                                                                                                                                                                                                                                                                                                                                                                                                                                                                                                                                                                                                                                                                                                                                                                                                                                                                                                                                                                                                                                                                                                                                                                                                                                                            | Instituto Nacional de Cancerología                                        | Instituto Nacional de Salud - Dirección de Investigación en Salud Pública                                                                                                                                                                                                                                                                                                                                                                                                                                                                                            | Carlos Franco-Muñoz; Diego A. Álvarez-Díaz; Diego Andrés Prada; Gerardo Santamaría; Jonathan Reales; Julian Naizaque; Katherine Laiton-Donato; Magdalena Wiesner; Marcela Mercado-Reyes; María T. Herrera-Sepúlveda; Martha Lucia Ospina Martínez; Mauricio Pacheco-Montealegre; Paola Muñoz-Laiton; Sheryll Corchuelo                                                                                                                                         |
| EPI_ISL_1557223                                                                                                                                                                                                                                                                                                                                                                                                                                                                                                                                                                                                                                                                                                                                                                                                                                                                                                                                                                                                                                                                                                                                                                                                                                                                                                                                                                                                                                                                                                                                                                                                                                                                                                                                                                                                                                                                                                                                                                                                                                                                                                                                                                                                                                                                                                                                                                                                                                                                                                                                                                                                                                                                                                                                                                                                                                                                                                                                                                                                                                                                                                                                                                                                                                                                                                                                                                                                                                                                                                                                                                                                                                                                                                                                                                                                                                                                                                                                                                                                                                                                                                                                                                                                                                                                                                                                                                                                                                                                                                                                                                                                                                                                                                                                                                                                                                                                                                                                                                                                                                                                                                                                                                                                                                                                                                                                                                                                                                                                                                                                                                                                                                                                                                                                                                                                                                                                                                                                                                                                                                                                                                                                                                                                                                                                                                                                                                                                                                                                                                                                                                                                                                                                                                                                                                                                                                                                                                                                                                                                                                                                                                                                                                                                                                                                                                                                                                                                                                                                                                                                                                                                                                                                                                                                                                                                                                                                                                                                                                                                                                                                                                                                                                                                                                                                                                                                                                                                                                                                                                                                                                                                                                                                                                                                                                                                                                                                                                                                                                                                                                                                                                                                                                                                                                                                                                                                                                                                                                                                                           | Instituto Nacional de Salud                                               | Corporación Corpogen Universidad de los Andes Universidad Central                                                                                                                                                                                                                                                                                                                                                                                                                                                                                                    | Anzola; Chaib De Mares; Christian; Del Portillo; Duitama; González; Jorge; Juan Manuel; Laura; Maryam; María Mercedes; Nelly; Patricia; Restrepo; Romero; Silvia; Zambrano                                                                                                                                                                                                                                                                                     |
| EPI_ISL_3319858, EPI_ISL_3320717, EPI_ISL_3320722                                                                                                                                                                                                                                                                                                                                                                                                                                                                                                                                                                                                                                                                                                                                                                                                                                                                                                                                                                                                                                                                                                                                                                                                                                                                                                                                                                                                                                                                                                                                                                                                                                                                                                                                                                                                                                                                                                                                                                                                                                                                                                                                                                                                                                                                                                                                                                                                                                                                                                                                                                                                                                                                                                                                                                                                                                                                                                                                                                                                                                                                                                                                                                                                                                                                                                                                                                                                                                                                                                                                                                                                                                                                                                                                                                                                                                                                                                                                                                                                                                                                                                                                                                                                                                                                                                                                                                                                                                                                                                                                                                                                                                                                                                                                                                                                                                                                                                                                                                                                                                                                                                                                                                                                                                                                                                                                                                                                                                                                                                                                                                                                                                                                                                                                                                                                                                                                                                                                                                                                                                                                                                                                                                                                                                                                                                                                                                                                                                                                                                                                                                                                                                                                                                                                                                                                                                                                                                                                                                                                                                                                                                                                                                                                                                                                                                                                                                                                                                                                                                                                                                                                                                                                                                                                                                                                                                                                                                                                                                                                                                                                                                                                                                                                                                                                                                                                                                                                                                                                                                                                                                                                                                                                                                                                                                                                                                                                                                                                                                                                                                                                                                                                                                                                                                                                                                                                                                                                                                                         | Instituto Nacional de Salud                                               | Instituto Nacional de Salud                                                                                                                                                                                                                                                                                                                                                                                                                                                                                                                                          | Carlos Franco-Muñoz; Carmen Osorio; Diana Malo; Diego A. Álvarez-Díaz; Diego Andrés Prada; Gerardo Santamaría; Hector Alejandro Ruiz-Moreno; Jhonattan Reales-González; Jorge Rivera; Juan Camilo Martínez; Julian Naizaque; Katherine Laiton-Donato; Lisseth Pardo; Magdalena Wiesner; Marcela Mercado-Reyes; María T. Herrera-Sepúlveda; Marta Lopez Blanco; Martha Lucia Ospina Martínez; Paola Rojas; Sergio Gomez; Sheryll Corchuelo; Ángela Alarcon Cruz |
| EPI_ISL_418262                                                                                                                                                                                                                                                                                                                                                                                                                                                                                                                                                                                                                                                                                                                                                                                                                                                                                                                                                                                                                                                                                                                                                                                                                                                                                                                                                                                                                                                                                                                                                                                                                                                                                                                                                                                                                                                                                                                                                                                                                                                                                                                                                                                                                                                                                                                                                                                                                                                                                                                                                                                                                                                                                                                                                                                                                                                                                                                                                                                                                                                                                                                                                                                                                                                                                                                                                                                                                                                                                                                                                                                                                                                                                                                                                                                                                                                                                                                                                                                                                                                                                                                                                                                                                                                                                                                                                                                                                                                                                                                                                                                                                                                                                                                                                                                                                                                                                                                                                                                                                                                                                                                                                                                                                                                                                                                                                                                                                                                                                                                                                                                                                                                                                                                                                                                                                                                                                                                                                                                                                                                                                                                                                                                                                                                                                                                                                                                                                                                                                                                                                                                                                                                                                                                                                                                                                                                                                                                                                                                                                                                                                                                                                                                                                                                                                                                                                                                                                                                                                                                                                                                                                                                                                                                                                                                                                                                                                                                                                                                                                                                                                                                                                                                                                                                                                                                                                                                                                                                                                                                                                                                                                                                                                                                                                                                                                                                                                                                                                                                                                                                                                                                                                                                                                                                                                                                                                                                                                                                                                            | Instituto Nacional de Salud                                               | Instituto Nacional de Salud Universidad Cooperativa de Colombia Instituto Alexander von Humboldt Imperial College-London London School of Hygiene & Tropical Medicine                                                                                                                                                                                                                                                                                                                                                                                                | Astrid C. Flórez; Carlos Franco-Muñoz; Christian Julian Villabona-Arenas; Diana Marcela Waltheros-Acero; Diego A. Álvarez-Díaz; Erika Ospitia; Gloria Puerto; Jose A. Usme-Ciro; Juliana Barbosa; Katherine Laiton-Donato; Liz Villabona-Arenas; Luz Dary Rodríguez; Mailyn A.Gonzalez; Marcela Mercado-Reyes; Martha Lucia Ospina Martínez; Nicolas D. Franco-Sierra; Nuno Rodrigues Faria; Sergio Gomez Rangel; Sussy Echeverria; Zulma M. Cucunubá          |
| EPI_ISL_2155036, EPI_ISL_2362572, EPI_ISL_2500925, EPI_ISL_2500926, EPI_ISL_2500927, EPI_ISL_2500928, EPI_ISL_2500929, EPI_ISL_2500930, EPI_ISL_2500931, EPI_ISL_2500932, EPI_ISL_2500933, EPI_ISL_2500934, EPI_ISL_2500945, EPI_ISL_2500946, EPI_ISL_2500947, EPI_ISL_2500948, EPI_ISL_2500949, EPI_ISL_2500950, EPI_ISL_2500951, EPI_ISL_2500952, EPI_ISL_2500953, EPI_ISL_2500954, EPI_ISL_2500955, EPI_ISL_2500956, EPI_ISL_2500957, EPI_ISL_2500958, EPI_ISL_2500959, EPI_ISL_2500960, EPI_ISL_2500961, EPI_ISL_2500962, EPI_ISL_2500963, EPI_ISL_2500964, EPI_ISL_2500965, EPI_ISL_2500966, EPI_ISL_2500970, EPI_ISL_2500971, EPI_ISL_2609609, EPI_ISL_2827760, EPI_ISL_2827762, EPI_ISL_2827775, EPI_ISL_2827781, EPI_ISL_2827785                                                                                                                                                                                                                                                                                                                                                                                                                                                                                                                                                                                                                                                                                                                                                                                                                                                                                                                                                                                                                                                                                                                                                                                                                                                                                                                                                                                                                                                                                                                                                                                                                                                                                                                                                                                                                                                                                                                                                                                                                                                                                                                                                                                                                                                                                                                                                                                                                                                                                                                                                                                                                                                                                                                                                                                                                                                                                                                                                                                                                                                                                                                                                                                                                                                                                                                                                                                                                                                                                                                                                                                                                                                                                                                                                                                                                                                                                                                                                                                                                                                                                                                                                                                                                                                                                                                                                                                                                                                                                                                                                                                                                                                                                                                                                                                                                                                                                                                                                                                                                                                                                                                                                                                                                                                                                                                                                                                                                                                                                                                                                                                                                                                                                                                                                                                                                                                                                                                                                                                                                                                                                                                                                                                                                                                                                                                                                                                                                                                                                                                                                                                                                                                                                                                                                                                                                                                                                                                                                                                                                                                                                                                                                                                                                                                                                                                                                                                                                                                                                                                                                                                                                                                                                                                                                                                                                                                                                                                                                                                                                                                                                                                                                                                                                                                                                                                                                                                                                                                                                                                                                                                                                                                                                                                                                                  | Instituto Nacional de Salud - Dirección de Investigación en Salud Pública | Carlos Franco-Muñoz; Carmen Osorio; Diana Malo; Diego A. Álvarez-Díaz; Diego Andrés Prada; Gerardo Santamaría; Hector Alejandro Ruiz-Moreno; Jhonattan Reales-González; Jorge Rivera; Juan Camilo Martínez; Julian Naizaque; Katherine Laiton-Donato; Lisseth Pardo; Magdalena Wiesner; Marcela Mercado-Reyes; María T. Herrera-Sepúlveda; Marta Lopez Blanco; Martha Lucia Ospina Martínez; Paola Rojas; Sergio Gomez; Sheryll Corchuelo; Ángela Alarcon Cruz                                                                                                       |                                                                                                                                                                                                                                                                                                                                                                                                                                                                |
| EPI_ISL_791084, EPI_ISL_791085, EPI_ISL_791086, EPI_ISL_791087, EPI_ISL_791088, EPI_ISL_791089, EPI_ISL_791089, EPI_ISL_791090, EPI_ISL_791091, EPI_ISL_791092, EPI_ISL_791093, EPI_ISL_791094, EPI_ISL_791095, EPI_ISL_791096                                                                                                                                                                                                                                                                                                                                                                                                                                                                                                                                                                                                                                                                                                                                                                                                                                                                                                                                                                                                                                                                                                                                                                                                                                                                                                                                                                                                                                                                                                                                                                                                                                                                                                                                                                                                                                                                                                                                                                                                                                                                                                                                                                                                                                                                                                                                                                                                                                                                                                                                                                                                                                                                                                                                                                                                                                                                                                                                                                                                                                                                                                                                                                                                                                                                                                                                                                                                                                                                                                                                                                                                                                                                                                                                                                                                                                                                                                                                                                                                                                                                                                                                                                                                                                                                                                                                                                                                                                                                                                                                                                                                                                                                                                                                                                                                                                                                                                                                                                                                                                                                                                                                                                                                                                                                                                                                                                                                                                                                                                                                                                                                                                                                                                                                                                                                                                                                                                                                                                                                                                                                                                                                                                                                                                                                                                                                                                                                                                                                                                                                                                                                                                                                                                                                                                                                                                                                                                                                                                                                                                                                                                                                                                                                                                                                                                                                                                                                                                                                                                                                                                                                                                                                                                                                                                                                                                                                                                                                                                                                                                                                                                                                                                                                                                                                                                                                                                                                                                                                                                                                                                                                                                                                                                                                                                                                                                                                                                                                                                                                                                                                                                                                                                                                                                                                            | Instituto Nacional de Salud - Unidad de Secuenciación y Análisis Genómico | Instituto Nacional de Salud - Dirección de Investigación en Salud Pública                                                                                                                                                                                                                                                                                                                                                                                                                                                                                            | Carlos Franco-Muñoz; Diego A. Álvarez-Díaz; Diego Andrés Prada; Gerardo Santamaría; Jeadran Malagon-Rojas; Jesith Tolosa; Jonathan Reales; Julia Almentero; Julian Naizaque; Katherine Laiton-Donato; Magdalena Wiesner; Marcela Mercado-Reyes; María T. Herrera; Martha Lucia Ospina Martínez; Mauricio Pacheco-Montealegre; Paola Muñoz-Laiton; Ronald Lopez; Sheryll Corchuelo                                                                              |
| EPI_ISL_456116, EPI_ISL_456117, EPI_ISL_456118, EPI_ISL_456119, EPI_ISL_456120, EPI_ISL_456121, EPI_ISL_456122, EPI_ISL_456123, EPI_ISL_456124, EPI_ISL_456125, EPI_ISL_456126, EPI_ISL_456127, EPI_ISL_456128, EPI_ISL_456129, EPI_ISL_456130, EPI_ISL_456131, EPI_ISL_456132, EPI_ISL_456133, EPI_ISL_456134, EPI_ISL_456135, EPI_ISL_456136, EPI_ISL_456137, EPI_ISL_456138, EPI_ISL_456139, EPI_ISL_456140, EPI_ISL_456141, EPI_ISL_456142, EPI_ISL_456143, EPI_ISL_456144, EPI_ISL_456145, EPI_ISL_456146, EPI_ISL_456147, EPI_ISL_456148, EPI_ISL_456149, EPI_ISL_456150, EPI_ISL_456151, EPI_ISL_456152, EPI_ISL_456153, EPI_ISL_456154, EPI_ISL_456155, EPI_ISL_456156                                                                                                                                                                                                                                                                                                                                                                                                                                                                                                                                                                                                                                                                                                                                                                                                                                                                                                                                                                                                                                                                                                                                                                                                                                                                                                                                                                                                                                                                                                                                                                                                                                                                                                                                                                                                                                                                                                                                                                                                                                                                                                                                                                                                                                                                                                                                                                                                                                                                                                                                                                                                                                                                                                                                                                                                                                                                                                                                                                                                                                                                                                                                                                                                                                                                                                                                                                                                                                                                                                                                                                                                                                                                                                                                                                                                                                                                                                                                                                                                                                                                                                                                                                                                                                                                                                                                                                                                                                                                                                                                                                                                                                                                                                                                                                                                                                                                                                                                                                                                                                                                                                                                                                                                                                                                                                                                                                                                                                                                                                                                                                                                                                                                                                                                                                                                                                                                                                                                                                                                                                                                                                                                                                                                                                                                                                                                                                                                                                                                                                                                                                                                                                                                                                                                                                                                                                                                                                                                                                                                                                                                                                                                                                                                                                                                                                                                                                                                                                                                                                                                                                                                                                                                                                                                                                                                                                                                                                                                                                                                                                                                                                                                                                                                                                                                                                                                                                                                                                                                                                                                                                                                                                                                                                                                                                                                                            | Instituto Nacional de Salud - Unidad de Secuenciación y Análisis Genómico | Instituto Nacional de Salud, Universidad Cooperativa de Colombia, Instituto Alexander von Humboldt, Imperial College-London, London School of Hygiene & Tropical Medicine                                                                                                                                                                                                                                                                                                                                                                                            | Astrid C. Flórez; Carlos Franco-Muñoz; Christian Julian Villabona-Arenas; Diana Marcela Waltheros-Acero; Diego A. Álvarez-Díaz; Erika Ospitia; Gloria Puerto; Jose A. Usme-Ciro; Juliana Barbosa; Katherine Laiton-Donato; Liz Villabona-Arenas; Luz Dary Rodríguez; Mailyn A.Gonzalez; Marcela Mercado-Reyes; Martha Lucia Ospina Martínez; Nicolas D. Franco-Sierra; Sergio Gomez-Rangel; Sussy Echeverria; Zulma M. Cucunubá                                |
| EPI_ISL_941942, EPI_ISL_941943, EPI_ISL_941949, EPI_ISL_941951, EPI_ISL_941953, EPI_ISL_941955, EPI_ISL_941956, EPI_ISL_941957, EPI_ISL_941958, EPI_ISL_941960, EPI_ISL_941963, EPI_ISL_941984, EPI_ISL_941985, EPI_ISL_941986, EPI_ISL_941987, EPI_ISL_941988, EPI_ISL_941989, EPI_ISL_941990, EPI_ISL_941991, EPI_ISL_941992, EPI_ISL_941993, EPI_ISL_941994, EPI_ISL_942003, EPI_ISL_942006                                                                                                                                                                                                                                                                                                                                                                                                                                                                                                                                                                                                                                                                                                                                                                                                                                                                                                                                                                                                                                                                                                                                                                                                                                                                                                                                                                                                                                                                                                                                                                                                                                                                                                                                                                                                                                                                                                                                                                                                                                                                                                                                                                                                                                                                                                                                                                                                                                                                                                                                                                                                                                                                                                                                                                                                                                                                                                                                                                                                                                                                                                                                                                                                                                                                                                                                                                                                                                                                                                                                                                                                                                                                                                                                                                                                                                                                                                                                                                                                                                                                                                                                                                                                                                                                                                                                                                                                                                                                                                                                                                                                                                                                                                                                                                                                                                                                                                                                                                                                                                                                                                                                                                                                                                                                                                                                                                                                                                                                                                                                                                                                                                                                                                                                                                                                                                                                                                                                                                                                                                                                                                                                                                                                                                                                                                                                                                                                                                                                                                                                                                                                                                                                                                                                                                                                                                                                                                                                                                                                                                                                                                                                                                                                                                                                                                                                                                                                                                                                                                                                                                                                                                                                                                                                                                                                                                                                                                                                                                                                                                                                                                                                                                                                                                                                                                                                                                                                                                                                                                                                                                                                                                                                                                                                                                                                                                                                                                                                                                                                                                                                                                            | Instituto Nacional de Salud, Bogotá, Colombia                             | Centro de Investigaciones en Microbiología y Biotecnología-UR (CIMBIUR), Facultad de Ciencias Naturales, Universidad del Rosario, Bogotá, Colombia Instituto Nacional de Salud, Bogotá, Colombia Icahn School of Medicine at Mount Sinai, New York, USA                                                                                                                                                                                                                                                                                                              | Adriana van de Guchte; Alberto Paniz-Mondolfo; Ana S. Gonzalez-Reiche; Carolina Flórez; Carolina Hernández; Emilia Mia Sordillo; Hala Alej Alshamary; Harn van Bakel; Jayeeta Dutta; Juan David Ramirez; Luz Helena Patiño; Marina Muñoz; Matthew M. Hernandez; Nathalia Ballesteros; Sergio Gomez; Viviana Simon; Zenab Khan                                                                                                                                  |
| EPI_ISL_447755, EPI_ISL_447756, EPI_ISL_447757, EPI_ISL_447758, EPI_ISL_447759, EPI_ISL_447760, EPI_ISL_447761, EPI_ISL_447762, EPI_ISL_447763, EPI_ISL_447764, EPI_ISL_447765, EPI_ISL_447766, EPI_ISL_447767, EPI_ISL_447768, EPI_ISL_447769, EPI_ISL_447771, EPI_ISL_447772, EPI_ISL_447773, EPI_ISL_447774, EPI_ISL_447775, EPI_ISL_447776, EPI_ISL_447777, EPI_ISL_447778, EPI_ISL_447779, EPI_ISL_447780, EPI_ISL_447781, EPI_ISL_447782, EPI_ISL_447783, EPI_ISL_447784, EPI_ISL_447785, EPI_ISL_447786, EPI_ISL_447787, EPI_ISL_447788, EPI_ISL_447789, EPI_ISL_447790, EPI_ISL_447791, EPI_ISL_447792, EPI_ISL_447793, EPI_ISL_447794, EPI_ISL_447795, EPI_ISL_447796, EPI_ISL_447797, EPI_ISL_447798, EPI_ISL_447799, EPI_ISL_447800, EPI_ISL_447801, EPI_ISL_447802, EPI_ISL_447803, EPI_ISL_447804, EPI_ISL_447805, EPI_ISL_447806, EPI_ISL_447807, EPI_ISL_447808, EPI_ISL_447809, EPI_ISL_447810, EPI_ISL_447811, EPI_ISL_447812, EPI_ISL_447813, EPI_ISL_447814, EPI_ISL_447815, EPI_ISL_447816, EPI_ISL_447817                                                                                                                                                                                                                                                                                                                                                                                                                                                                                                                                                                                                                                                                                                                                                                                                                                                                                                                                                                                                                                                                                                                                                                                                                                                                                                                                                                                                                                                                                                                                                                                                                                                                                                                                                                                                                                                                                                                                                                                                                                                                                                                                                                                                                                                                                                                                                                                                                                                                                                                                                                                                                                                                                                                                                                                                                                                                                                                                                                                                                                                                                                                                                                                                                                                                                                                                                                                                                                                                                                                                                                                                                                                                                                                                                                                                                                                                                                                                                                                                                                                                                                                                                                                                                                                                                                                                                                                                                                                                                                                                                                                                                                                                                                                                                                                                                                                                                                                                                                                                                                                                                                                                                                                                                                                                                                                                                                                                                                                                                                                                                                                                                                                                                                                                                                                                                                                                                                                                                                                                                                                                                                                                                                                                                                                                                                                                                                                                                                                                                                                                                                                                                                                                                                                                                                                                                                                                                                                                                                                                                                                                                                                                                                                                                                                                                                                                                                                                                                                                                                                                                                                                                                                                                                                                                                                                                                                                                                                                                                                                                                                                                                                                                                                                                                                                                                                                                                                                                                                                            | Instituto Nacional de Salud, Bogotá, Colombia                             | Grupo de Investigaciones Microbiológicas-UR (GIMUR), Departamento de Biología, Facultad de Ciencias Naturales, Universidad del Rosario, Bogotá, Colombia Instituto Nacional de Salud, Bogotá, Colombia Icahn School of Medicine at Mount Sinai, New York, USA                                                                                                                                                                                                                                                                                                        | Adriana Castillo; Alberto Paniz-Mondolfo; Ana S. Gonzalez-Reiche; Angelica Rico; Anibal A. Theherán; Carolina Florez; Carolina Hernandez; David Martínez; Emilia Mia Sordillo; Esther C. Barros; Harm van Bakel; Jesús E. Jaimés; Juan David Ramirez; Laura Vega; Lisseth Pardo; Marina Muñoz; Martha L. Ospina; Matthew M. Hernandez; Nathalia Ballesteros; Sergio Gomez; Wendy K. Jo; Zulma M. Cucunubá                                                      |
| EPI_ISL_497736, EPI_ISL_497738, EPI_ISL_497744, EPI_ISL_497745, EPI_ISL_498152, EPI_ISL_498153, EPI_ISL_498154, EPI_ISL_498155, EPI_ISL_498156, EPI_ISL_498157, EPI_ISL_498158, EPI_ISL_498159, EPI_ISL_498160, EPI_ISL_498161, EPI_ISL_498162, EPI_ISL_498163, EPI_ISL_498164, EPI_ISL_498165, EPI_ISL_498166, EPI_ISL_498167, EPI_ISL_498168, EPI_ISL_498169, EPI_ISL_498170, EPI_ISL_526932, EPI_ISL_526933, EPI_ISL_526934, EPI_ISL_526949, EPI_ISL_526950, EPI_ISL_526951, EPI_ISL_526952, EPI_ISL_526953, EPI_ISL_526954, EPI_ISL_526955, EPI_ISL_526956, EPI_ISL_526957, EPI_ISL_526958, EPI_ISL_526959, EPI_ISL_526960, EPI_ISL_526961, EPI_ISL_526962, EPI_ISL_526963, EPI_ISL_526964, EPI_ISL_526965, EPI_ISL_526966, EPI_ISL_526967, EPI_ISL_526968, EPI_ISL_526969, EPI_ISL_526970, EPI_ISL_526971, EPI_ISL_526972, EPI_ISL_526973, EPI_ISL_526974, EPI_ISL_526975, EPI_ISL_526976, EPI_ISL_526977, EPI_ISL_526978, EPI_ISL_526979, EPI_ISL_526980, EPI_ISL_526981, EPI_ISL_526982, EPI_ISL_526983, EPI_ISL_526984, EPI_ISL_526985, EPI_ISL_526986, EPI_ISL_526987, EPI_ISL_526988, EPI_ISL_526989, EPI_ISL_526990, EPI_ISL_526991, EPI_ISL_526992, EPI_ISL_526993, EPI_ISL_526994, EPI_ISL_526995, EPI_ISL_526996, EPI_ISL_526997, EPI_ISL_526998, EPI_ISL_526999, EPI_ISL_739665, EPI_ISL_739666, EPI_ISL_739667, EPI_ISL_739668, EPI_ISL_739669, EPI_ISL_739670, EPI_ISL_739671, EPI_ISL_739672, EPI_ISL_739673, EPI_ISL_739674, EPI_ISL_739675, EPI_ISL_739676, EPI_ISL_739677, EPI_ISL_739678, EPI_ISL_739679, EPI_ISL_739680, EPI_ISL_739681, EPI_ISL_739682, EPI_ISL_739683                                                                                                                                                                                                                                                                                                                                                                                                                                                                                                                                                                                                                                                                                                                                                                                                                                                                                                                                                                                                                                                                                                                                                                                                                                                                                                                                                                                                                                                                                                                                                                                                                                                                                                                                                                                                                                                                                                                                                                                                                                                                                                                                                                                                                                                                                                                                                                                                                                                                                                                                                                                                                                                                                                                                                                                                                                                                                                                                                                                                                                                                                                                                                                                                                                                                                                                                                                                                                                                                                                                                                                                                                                                                                                                                                                                                                                                                                                                                                                                                                                                                                                                                                                                                                                                                                                                                                                                                                                                                                                                                                                                                                                                                                                                                                                                                                                                                                                                                                                                                                                                                                                                                                                                                                                                                                                                                                                                                                                                                                                                                                                                                                                                                                                                                                                                                                                                                                                                                                                                                                                                                                                                                                                                                                                                                                                                                                                                                                                                                                                                                                                                                                                                                                                                                                                                                                                                                                                                                                                                                                                                                                                                                                                                                                                                                                                                                                                                                                                                                                                                                                                                                                                                                                                                                                                                                                                                                                                            | Instituto Nacional de Salud, Bogotá, Colombia                             | Astrid C. Flórez; Carlos Andrés Durán; Carlos Franco-Muñoz; Carolina Ferro; Christian Julian Villabona-Arenas; Diana Marcela Waltheros-Acero; Diego A. Álvarez-Díaz; Diego Andrés Prada; Edmison F. de Oliveira-Filho; Felix Betzler; Franklin Prieto; Jeadran Malagon-Rojas; Jonathan Reales; Jose A. Usme-Ciro; Katherine Laiton-Donato; Liz Villabona-Arenas; Magdalena Wiesner; Marcela Mercado-Reyes; Martha Lucia Ospina Martínez; Mauricio Pacheco-Montealegre; Nicolas D. Franco-Sierra; Sheryll Corchuelo; Sussy Echeverria; Wendy K. Jo; Zulma M. Cucunubá |                                                                                                                                                                                                                                                                                                                                                                                                                                                                |
| EPI_ISL_956282, EPI_ISL_956283, EPI_ISL_956284, EPI_ISL_956285, EPI_ISL_956286, EPI_ISL_956287, EPI_ISL_956288, EPI_ISL_956289, EPI_ISL_956290, EPI_ISL_956291, EPI_ISL_956292, EPI_ISL_956293, EPI_ISL_956294, EPI_ISL_956295, EPI_ISL_956296, EPI_ISL_956297, EPI_ISL_956298, EPI_ISL_956299, EPI_ISL_956300, EPI_ISL_956301, EPI_ISL_956302, EPI_ISL_956303, EPI_ISL_956304, EPI_ISL_956305, EPI_ISL_956306, EPI_ISL_956307, EPI_ISL_956308, EPI_ISL_956309, EPI_ISL_956310, EPI_ISL_956311, EPI_ISL_956312, EPI_ISL_956313, EPI_ISL_956314, EPI_ISL_956315, EPI_ISL_956316, EPI_ISL_956317, EPI_ISL_956318, EPI_ISL_956319, EPI_ISL_956320, EPI_ISL_956321, EPI_ISL_956322, EPI_ISL_956323, EPI_ISL_956324, EPI_ISL_956325, EPI_ISL_956326, EPI_ISL_956327, EPI_ISL_956328, EPI_ISL_956329, EPI_ISL_956330, EPI_ISL_956331, EPI_ISL_956332, EPI_ISL_956333, EPI_ISL_956334, EPI_ISL_956335, EPI_ISL_956336, EPI_ISL_956337, EPI_ISL_956338, EPI_ISL_956339, EPI_ISL_956340, EPI_ISL_956341, EPI_ISL_956342, EPI_ISL_956343, EPI_ISL_956344, EPI_ISL_956345, EPI_ISL_956346, EPI_ISL_956347, EPI_ISL_956348, EPI_ISL_956349, EPI_ISL_956350, EPI_ISL_956351, EPI_ISL_956352, EPI_ISL_956353, EPI_ISL_956354, EPI_ISL_956355, EPI_ISL_956356, EPI_ISL_956357, EPI_ISL_956358, EPI_ISL_956359, EPI_ISL_956360, EPI_ISL_956361, EPI_ISL_956362, EPI_ISL_956363, EPI_ISL_956364, EPI_ISL_956365, EPI_ISL_956366, EPI_ISL_956367, EPI_ISL_956368, EPI_ISL_956369, EPI_ISL_956370, EPI_ISL_956371, EPI_ISL_956372, EPI_ISL_956373, EPI_ISL_956374, EPI_ISL_956375, EPI_ISL_956376, EPI_ISL_956377, EPI_ISL_956378, EPI_ISL_956379, EPI_ISL_956380, EPI_ISL_956381, EPI_ISL_956382, EPI_ISL_956383, EPI_ISL_956384, EPI_ISL_956385, EPI_ISL_956386, EPI_ISL_956387, EPI_ISL_956388, EPI_ISL_956389, EPI_ISL_956390, EPI_ISL_956391, EPI_ISL_956392, EPI_ISL_956393, EPI_ISL_956394, EPI_ISL_956395, EPI_ISL_956396, EPI_ISL_956397, EPI_ISL_956398, EPI_ISL_956399, EPI_ISL_956400, EPI_ISL_956401, EPI_ISL_956402, EPI_ISL_956403, EPI_ISL_956404, EPI_ISL_956405, EPI_ISL_956406, EPI_ISL_956407, EPI_ISL_956408, EPI_ISL_956409, EPI_ISL_956410, EPI_ISL_956411, EPI_ISL_956412, EPI_ISL_956413, EPI_ISL_956414, EPI_ISL_956415, EPI_ISL_956416, EPI_ISL_956417, EPI_ISL_956418, EPI_ISL_956419, EPI_ISL_956420, EPI_ISL_956421, EPI_ISL_956422, EPI_ISL_956423, EPI_ISL_956424, EPI_ISL_956425, EPI_ISL_956426, EPI_ISL_956427, EPI_ISL_956428, EPI_ISL_956429, EPI_ISL_956430, EPI_ISL_956431, EPI_ISL_956432, EPI_ISL_956433, EPI_ISL_956434, EPI_ISL_956435, EPI_ISL_956436, EPI_ISL_956437, EPI_ISL_956438, EPI_ISL_956439, EPI_ISL_956440, EPI_ISL_956441, EPI_ISL_956442, EPI_ISL_956443, EPI_ISL_956444, EPI_ISL_956445, EPI_ISL_956446, EPI_ISL_956447, EPI_ISL_956448, EPI_ISL_956449, EPI_ISL_956450, EPI_ISL_956451, EPI_ISL_956452, EPI_ISL_956453, EPI_ISL_956454, EPI_ISL_956455, EPI_ISL_956456, EPI_ISL_956457, EPI_ISL_956458, EPI_ISL_956459, EPI_ISL_956460, EPI_ISL_956461, EPI_ISL_956462, EPI_ISL_956463, EPI_ISL_956464, EPI_ISL_956465, EPI_ISL_956466, EPI_ISL_956467, EPI_ISL_956468, EPI_ISL_956469, EPI_ISL_956470, EPI_ISL_956471, EPI_ISL_956472, EPI_ISL_956473, EPI_ISL_956474, EPI_ISL_956475, EPI_ISL_956476, EPI_ISL_956477, EPI_ISL_956478, EPI_ISL_956479, EPI_ISL_956480, EPI_ISL_956481, EPI_ISL_956482, EPI_ISL_956483, EPI_ISL_956484, EPI_ISL_956485, EPI_ISL_956486, EPI_ISL_956487, EPI_ISL_956488, EPI_ISL_956489, EPI_ISL_956490, EPI_ISL_956491, EPI_ISL_956492, EPI_ISL_956493, EPI_ISL_956494, EPI_ISL_956495, EPI_ISL_956496, EPI_ISL_956497, EPI_ISL_956498, EPI_ISL_956499, EPI_ISL_956500, EPI_ISL_956501, EPI_ISL_956502, EPI_ISL_956503, EPI_ISL_956504, EPI_ISL_956505, EPI_ISL_956506, EPI_ISL_956507, EPI_ISL_956508, EPI_ISL_956509, EPI_ISL_956510, EPI_ISL_956511, EPI_ISL_956512, EPI_ISL_956513, EPI_ISL_956514, EPI_ISL_956515, EPI_ISL_956516, EPI_ISL_956517, EPI_ISL_956518, EPI_ISL_956519, EPI_ISL_956520, EPI_ISL_956521, EPI_ISL_956522, EPI_ISL_956523, EPI_ISL_956524, EPI_ISL_956525, EPI_ISL_956526, EPI_ISL_956527, EPI_ISL_956528, EPI_ISL_956529, EPI_ISL_956530, EPI_ISL_956531, EPI_ISL_956532, EPI_ISL_956533, EPI_ISL_956534, EPI_ISL_956535, EPI_ISL_956536, EPI_ISL_956537, EPI_ISL_956538, EPI_ISL_956539, EPI_ISL_956540, EPI_ISL_956541, EPI_ISL_956542, EPI_ISL_956543, EPI_ISL_956544, EPI_ISL_956545, EPI_ISL_956546, EPI_ISL_956547, EPI_ISL_956548, EPI_ISL_956549, EPI_ISL_956550, EPI_ISL_956551, EPI_ISL_956552, EPI_ISL_956553, EPI_ISL_956554, EPI_ISL_956555, EPI_ISL_956556, EPI_ISL_956557, EPI_ISL_956558, EPI_ISL_956559, EPI_ISL_956560, EPI_ISL_956561, EPI_ISL_956562, EPI_ISL_956563, EPI_ISL_956564, EPI_ISL_956565, EPI_ISL_956566, EPI_ISL_956567, EPI_ISL_956568, EPI_ISL_956569, EPI_ISL_956570, EPI_ISL_956571, EPI_ISL_956572, EPI_ISL_956573, EPI_ISL_956574, EPI_ISL_956575, EPI_ISL_956576, EPI_ISL_956577, EPI_ISL_956578, EPI_ISL_956579, EPI_ISL_956580, EPI_ISL_956581, EPI_ISL_956582, EPI_ISL_956583, EPI_ISL_956584, EPI_ISL_956585, EPI_ISL_956586, EPI_ISL_956587, EPI_ISL_956588, EPI_ISL_956589, EPI_ISL_956590, EPI_ISL_956591, EPI_ISL_956592, EPI_ISL_956593, EPI_ISL_956594, EPI_ISL_956595, EPI_ISL_956596, EPI_ISL_956597, EPI_ISL_956598, EPI_ISL_956599, EPI_ISL_956600, EPI_ISL_956601, EPI_ISL_956602, EPI_ISL_956603, EPI_ISL_956604, EPI_ISL_956605, EPI_ISL_956606, EPI_ISL_956607, EPI_ISL_956608, EPI_ISL_956609, EPI_ISL_956610, EPI_ISL_956611, EPI_ISL_956612, EPI_ISL_956613, EPI_ISL_956614, EPI_ISL_956615, EPI_ISL_956616, EPI_ISL_956617, EPI_ISL_956618, EPI_ISL_956619, EPI_ISL_956620, EPI_ISL_956621, EPI_ISL_956622, EPI_ISL_956623, EPI_ISL_956624, EPI_ISL_956625, EPI_ISL_956626, EPI_ISL_956627, EPI_ISL_956628, EPI_ISL_956629, EPI_ISL_956630, EPI_ISL_956631, EPI_ISL_956632, EPI_ISL_956633, EPI_ISL_956634, EPI_ISL_956635, EPI_ISL_956636, EPI_ISL_956637, EPI_ISL_956638, EPI_ISL_956639, EPI_ISL_956640, EPI_ISL_956641, EPI_ISL_956642, EPI_ISL_956643, EPI_ISL_956644, EPI_ISL_956645, EPI_ISL_956646, EPI_ISL_956647, EPI_ISL_956648, EPI_ISL_956649, EPI_ISL_956650, EPI_ISL_956651, EPI_ISL_956652, EPI_ISL_956653, EPI_ISL_956654, EPI_ISL_956655, EPI_ISL_956656, EPI_ISL_956657, EPI_ISL_956658, EPI_ISL_956659, EPI_ISL_956660, EPI_ISL_956661, EPI_ISL_956662, EPI_ISL_956663, EPI_ISL_956664, EPI_ISL_956665, EPI_ISL_956666, EPI_ISL_956667, EPI_ISL_956668, EPI_ISL_956669, EPI_ISL_956670, EPI_ISL_956671, EPI_ISL_956672, EPI_ISL_956673, EPI_ISL_956674, EPI_ISL_956675, EPI_ISL_956676, EPI_ISL_956677, EPI_ISL_956678, EPI_ISL_956679, EPI_ISL_956680, EPI_ISL_956681, EPI_ISL_956682, EPI_ISL_956683, EPI_ISL_956684, EPI_ISL_956685, EPI_ISL_956686, EPI_ISL_956687, EPI_ISL_956688, EPI_ISL_956689, EPI_ISL_956690, EPI_ISL_956691, EPI_ISL_956692, EPI_ISL_956693, EPI_ISL_956694, EPI_ISL_956695, EPI_ISL_956696, EPI_ISL_956697, EPI_ISL_956698, EPI_ISL_956699, EPI_ISL_956700, EPI_ISL_956701, EPI_ISL_956702, EPI_ISL_956703, EPI_ISL_956704, EPI_ISL_956705, EPI_ISL_956706, EPI_ISL_956707, EPI_ISL_956708, EPI_ISL_956709, EPI_ISL_956710, EPI_ISL_956711, EPI_ISL_956712, EPI_ISL_956713, EPI_ISL_956714, EPI_ISL_956715, EPI_ISL_956716, EPI_ISL_956717, EPI_ISL_956718, EPI_ISL_956719, EPI_ISL_956720, EPI_ISL_956721, EPI_ISL_956722, EPI_ISL_956723, EPI_ISL_956724, EPI_ISL_956725, EPI_ISL_956726, EPI_ISL_956727, EPI_ISL_956728, EPI_ISL_956729, EPI_ISL_956730, EPI_ISL_956731, EPI_ISL_956732, EPI_ISL_956733, EPI_ISL_956734, EPI_ISL_956735, EPI_ISL_956736, EPI_ISL_956737, EPI_ISL_956738, EPI_ISL_956739, EPI_ISL_956740, EPI_ISL_956741, EPI_ISL_956742, EPI_ISL_956743, EPI_ISL_956744, EPI_ISL_956745, EPI_ISL_956746, EPI_ISL_956747, EPI_ISL_956748, EPI_ISL_956749, EPI_ISL_956750, EPI_ISL_956751, EPI_ISL_956752, EPI_ISL_956753, EPI_ISL_956754, EPI_ISL_956755, EPI_ISL_956756, EPI_ISL_956757, EPI_ISL_956758, EPI_ISL_956759, EPI_ISL_956760, EPI_ISL_956761, EPI_ISL_956762, EPI_ISL_956763, EPI_ISL_956764, EPI_ISL_956765, EPI_ISL_956766, EPI_ISL_956767, EPI_ISL_956768, EPI_ISL_956769, EPI_ISL_956770, EPI_ISL_956771, EPI_ISL_956772, EPI_ISL_956773, EPI_ISL_956774, EPI_ISL_956775, EPI_ISL_956776, EPI_ISL_956777, EPI_ISL_956778, EPI_ISL_956779, EPI_ISL_956780, EPI_ISL_956781, EPI_ISL_956782, EPI_ISL_956783, EPI_ISL_956784, EPI_ISL_956785, EPI_ISL_956786, EPI_ISL_956787, EPI_ISL_956788, EPI_ISL_956789, EPI_ISL_956790, EPI_ISL_956791, EPI_ISL_956792, EPI_ISL_956793, EPI_ISL_956794, EPI_ISL_956795, EPI_ISL_956796, EPI_ISL_956797, EPI_ISL_956798, EPI_ISL_956799, EPI_ISL_956800, EPI_ISL_956801, EPI_ISL_956802, EPI_ISL_956803, EPI_ISL_956804, EPI_ISL_956805, EPI_ISL_956806, EPI_ISL_956807, EPI_ISL_956808, EPI_ISL_956809, EPI_ISL_956810, EPI_ISL_956811, EPI_ISL_956812, EPI_ISL_956813, EPI_ISL_956814, EPI_ISL_956815, EPI_ISL_956816, EPI_ISL_956817, EPI_ISL_956818, EPI_ISL_956819, EPI_ISL_956820, EPI_ISL_956821, EPI_ISL_956822, EPI_ISL_956823, EPI_ISL_956824, EPI_ISL_956825, EPI_ISL_956826, EPI_ISL_956827, EPI_ISL_956828, EPI_ISL_956829, EPI_ISL_956830, EPI_ISL_956831, EPI_ISL_956832, EPI_ISL_956833, EPI_ISL_956834, EPI_ISL_956835, EPI_ISL_956836, EPI_ISL_956837, EPI_ISL_956838, EPI_ISL_956839, EPI_ISL_956840, EPI_ISL_956841, EPI_ISL_956842, EPI_ISL_956843, EPI_ISL_956844, EPI_ISL_956845, EPI_ISL_956846, EPI_ISL_956847, EPI_ISL_956848, EPI_ISL_956849, EPI_ISL_956850, EPI_ISL_956851, EPI_ISL_9 |                                                                           |                                                                                                                                                                                                                                                                                                                                                                                                                                                                                                                                                                      |                                                                                                                                                                                                                                                                                                                                                                                                                                                                |



|                                                                                                                                                                                                                                                                                                                                                                                                                                                                                                                                                                                                                                                                                                                                                                                             |                                                         |                                                                           |                                                                                                                                                                                                                                                                                                                                                                                                                                                                                                         |
|---------------------------------------------------------------------------------------------------------------------------------------------------------------------------------------------------------------------------------------------------------------------------------------------------------------------------------------------------------------------------------------------------------------------------------------------------------------------------------------------------------------------------------------------------------------------------------------------------------------------------------------------------------------------------------------------------------------------------------------------------------------------------------------------|---------------------------------------------------------|---------------------------------------------------------------------------|---------------------------------------------------------------------------------------------------------------------------------------------------------------------------------------------------------------------------------------------------------------------------------------------------------------------------------------------------------------------------------------------------------------------------------------------------------------------------------------------------------|
| EPI_ISL_1632514, EPI_ISL_1652039, EPI_ISL_1652040, EPI_ISL_1652041, EPI_ISL_1820951                                                                                                                                                                                                                                                                                                                                                                                                                                                                                                                                                                                                                                                                                                         | LDSP BOGOTA                                             | Instituto Nacional de Salud- Dirección de Investigación en Salud Pública  | Martinez; Paola Rojas; Patricia del Portillo; Sergio Gomez; Sheryll Corchuelo; Ángela Alarcon Cruz                                                                                                                                                                                                                                                                                                                                                                                                      |
| EPI_ISL_3385804, EPI_ISL_3385827, EPI_ISL_3385833, EPI_ISL_3385841, EPI_ISL_3385852                                                                                                                                                                                                                                                                                                                                                                                                                                                                                                                                                                                                                                                                                                         | LDSP BOYACA                                             | Instituto Nacional de Salud- Dirección de Investigación en Salud Pública  | Carlos Franco-Muñoz; Carmen Osorio; Diana Malo; Diego A. Álvarez-Díaz; Diego Andrés Prada; Gerardo Santamaría; Hector Alejandro Ruiz-Moreno; Jhonattan Reales-González; Jorge Rivera; Juan Camilo Martínez; Julian Naizaque; Katherine Laiton-Donato; Lisseth Pardo; Magdalena Wiesner; Marcela Mercado-Reyes; María T. Herrera-Sepúlveda; Marta Lopez Blanco; Martha Lucia Ospina Martínez; Paola Rojas; Sergio Gomez; Sheryll Corchuelo; Ángela Alarcon Cruz                                          |
| EPI_ISL_1632504, EPI_ISL_1805640, EPI_ISL_1805641, EPI_ISL_1805642, EPI_ISL_1805643, EPI_ISL_1805644, EPI_ISL_1805645, EPI_ISL_1805646, EPI_ISL_1805743, EPI_ISL_2009060, EPI_ISL_2155048, EPI_ISL_2155049, EPI_ISL_2674296                                                                                                                                                                                                                                                                                                                                                                                                                                                                                                                                                                 | see above                                               | LDSP CALDAS                                                               | Instituto Nacional de Salud- Dirección de Investigación en Salud Pública                                                                                                                                                                                                                                                                                                                                                                                                                                |
| EPI_ISL_3459386, EPI_ISL_3459387, EPI_ISL_3459389, EPI_ISL_3459398, EPI_ISL_3459413                                                                                                                                                                                                                                                                                                                                                                                                                                                                                                                                                                                                                                                                                                         | LDSP CAQUETA                                            | Instituto Nacional de Salud                                               | Carlos Franco-Muñoz; Carmen Osorio; Diana Malo; Diego A. Álvarez-Díaz; Diego Andrés Prada; Gerardo Santamaría; Hector Alejandro Ruiz-Moreno; Jhonattan Reales-González; Jorge Rivera; Juan Camilo Martínez; Julian Naizaque; Katherine Laiton-Donato; Lisseth Pardo; Magdalena Wiesner; Marcela Mercado-Reyes; María T. Herrera-Sepúlveda; Marta Lopez Blanco; Martha Lucia Ospina Martínez; Paola Rojas; Sergio Gomez; Sheryll Corchuelo; Ángela Alarcon Cruz                                          |
| EPI_ISL_1652045, EPI_ISL_2362562, EPI_ISL_2827767, EPI_ISL_2827777                                                                                                                                                                                                                                                                                                                                                                                                                                                                                                                                                                                                                                                                                                                          | LDSP CASANARE                                           | Instituto Nacional de Salud- Dirección de Investigación en Salud Pública  | Carlos Franco-Muñoz; Carmen Osorio; Christian Romero; Diana Malo; Diego A. Álvarez-Díaz; Diego Andrés Prada; Gerardo Santamaría; Hector Alejandro Ruiz-Moreno; Jhonattan Reales-González; Jorge Rivera; Juan Camilo Martínez; Julian Naizaque; Katherine Laiton-Donato; Lisseth Pardo; Magdalena Wiesner; Marcela Mercado-Reyes; María T. Herrera-Sepúlveda; Marta Lopez Blanco; Martha Lucia Ospina Martínez; Paola Rojas; Patricia del Portillo; Sergio Gomez; Sheryll Corchuelo; Ángela Alarcon Cruz |
| EPI_ISL_3459392, EPI_ISL_3459399, EPI_ISL_3459400, EPI_ISL_3459401, EPI_ISL_3462743                                                                                                                                                                                                                                                                                                                                                                                                                                                                                                                                                                                                                                                                                                         | LDSP CESAR                                              | Instituto Nacional de Salud                                               | Carlos Franco-Muñoz; Carmen Osorio; Diana Malo; Diego A. Álvarez-Díaz; Diego Andrés Prada; Gerardo Santamaría; Hector Alejandro Ruiz-Moreno; Jhonattan Reales-González; Jorge Rivera; Juan Camilo Martínez; Julian Naizaque; Katherine Laiton-Donato; Lisseth Pardo; Magdalena Wiesner; Marcela Mercado-Reyes; María T. Herrera-Sepúlveda; Marta Lopez Blanco; Martha Lucia Ospina Martínez; Paola Rojas; Sergio Gomez; Sheryll Corchuelo; Ángela Alarcon Cruz                                          |
| EPI_ISL_2362571, EPI_ISL_2362573, EPI_ISL_2362574, EPI_ISL_2362575, EPI_ISL_2362576, EPI_ISL_2362577, EPI_ISL_2362578, EPI_ISL_2674284                                                                                                                                                                                                                                                                                                                                                                                                                                                                                                                                                                                                                                                      | see above                                               | LDSP CESAR                                                                | Instituto Nacional de Salud- Dirección de Investigación en Salud Pública                                                                                                                                                                                                                                                                                                                                                                                                                                |
| EPI_ISL_3459375, EPI_ISL_3459381, EPI_ISL_3459383, EPI_ISL_3459391, EPI_ISL_3459402, EPI_ISL_3459403                                                                                                                                                                                                                                                                                                                                                                                                                                                                                                                                                                                                                                                                                        | LDSP CUNDINAMARCA                                       | Instituto Nacional de Salud                                               | Carlos Franco-Muñoz; Carmen Osorio; Diana Malo; Diego A. Álvarez-Díaz; Diego Andrés Prada; Gerardo Santamaría; Hector Alejandro Ruiz-Moreno; Jhonattan Reales-González; Jorge Rivera; Juan Camilo Martínez; Julian Naizaque; Katherine Laiton-Donato; Lisseth Pardo; Magdalena Wiesner; Marcela Mercado-Reyes; María T. Herrera-Sepúlveda; Marta Lopez Blanco; Martha Lucia Ospina Martínez; Paola Rojas; Sergio Gomez; Sheryll Corchuelo; Ángela Alarcon Cruz                                          |
| EPI_ISL_2158353, EPI_ISL_2362585, EPI_ISL_2362586, EPI_ISL_2362587, EPI_ISL_2362588, EPI_ISL_2362589, EPI_ISL_2362590, EPI_ISL_2362591, EPI_ISL_2362592, EPI_ISL_2674289, EPI_ISL_2827786                                                                                                                                                                                                                                                                                                                                                                                                                                                                                                                                                                                                   | see above                                               | LDSP CUNDINAMARCA                                                         | Instituto Nacional de Salud- Dirección de Investigación en Salud Pública                                                                                                                                                                                                                                                                                                                                                                                                                                |
| EPI_ISL_1626608, EPI_ISL_1626609                                                                                                                                                                                                                                                                                                                                                                                                                                                                                                                                                                                                                                                                                                                                                            | LDSP Caldas                                             | Instituto Nacional de Salud- Dirección de Investigación en Salud Pública  | Carlos Franco-Muñoz; Carmen Osorio; Diana Malo; Diego A. Álvarez-Díaz; Diego Andrés Prada; Gerardo Santamaría; Hector Alejandro Ruiz-Moreno; Jhonattan Reales-González; Jorge Rivera; Juan Camilo Martínez; Julian Naizaque; Katherine Laiton-Donato; Lisseth Pardo; Magdalena Wiesner; Marcela Mercado-Reyes; María T. Herrera-Sepúlveda; Marta Lopez Blanco; Martha Lucia Ospina Martínez; Paola Rojas; Sergio Gomez; Sheryll Corchuelo; Ángela Alarcon Cruz                                          |
| EPI_ISL_3319857, EPI_ISL_3320728, EPI_ISL_3320737, EPI_ISL_3320741                                                                                                                                                                                                                                                                                                                                                                                                                                                                                                                                                                                                                                                                                                                          | LDSP Casanare                                           | Instituto Nacional de Salud                                               | Carlos Franco-Muñoz; Carmen Osorio; Diana Malo; Diego A. Álvarez-Díaz; Diego Andrés Prada; Gerardo Santamaría; Hector Alejandro Ruiz-Moreno; Jhonattan Reales-González; Jorge Rivera; Juan Camilo Martínez; Julian Naizaque; Katherine Laiton-Donato; Lisseth Pardo; Magdalena Wiesner; Marcela Mercado-Reyes; María T. Herrera-Sepúlveda; Marta Lopez Blanco; Martha Lucia Ospina Martínez; Paola Rojas; Sergio Gomez; Sheryll Corchuelo; Ángela Alarcon Cruz                                          |
| EPI_ISL_3320731, EPI_ISL_3320735, EPI_ISL_3320739, EPI_ISL_3320744, EPI_ISL_3320749                                                                                                                                                                                                                                                                                                                                                                                                                                                                                                                                                                                                                                                                                                         | LDSP Cundinamarca                                       | Instituto Nacional de Salud                                               | Carlos Franco-Muñoz; Carmen Osorio; Diana Malo; Diego A. Álvarez-Díaz; Diego Andrés Prada; Gerardo Santamaría; Hector Alejandro Ruiz-Moreno; Jhonattan Reales-González; Jorge Rivera; Juan Camilo Martínez; Julian Naizaque; Katherine Laiton-Donato; Lisseth Pardo; Magdalena Wiesner; Marcela Mercado-Reyes; María T. Herrera-Sepúlveda; Marta Lopez Blanco; Martha Lucia Ospina Martínez; Paola Rojas; Sergio Gomez; Sheryll Corchuelo; Ángela Alarcon Cruz                                          |
| EPI_ISL_1805635, EPI_ISL_1805636, EPI_ISL_1805637, EPI_ISL_1805638, EPI_ISL_1805639, EPI_ISL_1805742, EPI_ISL_1821069, EPI_ISL_2009063, EPI_ISL_2009064                                                                                                                                                                                                                                                                                                                                                                                                                                                                                                                                                                                                                                     | see above                                               | LDSP FRONTERIZO                                                           | Instituto Nacional de Salud- Dirección de Investigación en Salud Pública                                                                                                                                                                                                                                                                                                                                                                                                                                |
| EPI_ISL_2674301, EPI_ISL_2674302, EPI_ISL_2674303, EPI_ISL_2674304, EPI_ISL_2674323, EPI_ISL_2674324                                                                                                                                                                                                                                                                                                                                                                                                                                                                                                                                                                                                                                                                                        | LDSP HUILA                                              | Instituto Nacional de Salud- Dirección de Investigación en Salud Pública  | Carlos Franco-Muñoz; Carmen Osorio; Diana Malo; Diego A. Álvarez-Díaz; Diego Andrés Prada; Gerardo Santamaría; Hector Alejandro Ruiz-Moreno; Jhonattan Reales-González; Jorge Rivera; Juan Camilo Martínez; Julian Naizaque; Katherine Laiton-Donato; Lisseth Pardo; Magdalena Wiesner; Marcela Mercado-Reyes; María T. Herrera-Sepúlveda; Marta Lopez Blanco; Martha Lucia Ospina Martínez; Paola Rojas; Sergio Gomez; Sheryll Corchuelo; Ángela Alarcon Cruz                                          |
| EPI_ISL_2674294, EPI_ISL_2674295                                                                                                                                                                                                                                                                                                                                                                                                                                                                                                                                                                                                                                                                                                                                                            | LDSP LETICIA                                            | Instituto Nacional de Salud- Dirección de Investigación en Salud Pública  | Carlos Franco-Muñoz; Carmen Osorio; Diana Malo; Diego A. Álvarez-Díaz; Diego Andrés Prada; Gerardo Santamaría; Hector Alejandro Ruiz-Moreno; Jhonattan Reales-González; Jorge Rivera; Juan Camilo Martínez; Julian Naizaque; Katherine Laiton-Donato; Lisseth Pardo; Magdalena Wiesner; Marcela Mercado-Reyes; María T. Herrera-Sepúlveda; Marta Lopez Blanco; Martha Lucia Ospina Martínez; Paola Rojas; Sergio Gomez; Sheryll Corchuelo; Ángela Alarcon Cruz                                          |
| EPI_ISL_2009061, EPI_ISL_2674310, EPI_ISL_2674311, EPI_ISL_2674312                                                                                                                                                                                                                                                                                                                                                                                                                                                                                                                                                                                                                                                                                                                          | LDSP NARIÑO                                             | Instituto Nacional de Salud- Dirección de Investigación en Salud Pública  | Carlos Franco-Muñoz; Carmen Osorio; Diana Malo; Diego A. Álvarez-Díaz; Diego Andrés Prada; Gerardo Santamaría; Hector Alejandro Ruiz-Moreno; Jhonattan Reales-González; Jorge Rivera; Juan Camilo Martínez; Julian Naizaque; Katherine Laiton-Donato; Lisseth Pardo; Magdalena Wiesner; Marcela Mercado-Reyes; María T. Herrera-Sepúlveda; Marta Lopez Blanco; Martha Lucia Ospina Martínez; Paola Rojas; Sergio Gomez; Sheryll Corchuelo; Ángela Alarcon Cruz                                          |
| EPI_ISL_1582977, EPI_ISL_1582981, EPI_ISL_1652042, EPI_ISL_1652043, EPI_ISL_1820946                                                                                                                                                                                                                                                                                                                                                                                                                                                                                                                                                                                                                                                                                                         | LDSP NORTE DE SANTANDER                                 | Instituto Nacional de Salud- Dirección de Investigación en Salud Pública  | Carlos Franco-Muñoz; Carmen Osorio; Christian Romero; Diana Malo; Diego A. Álvarez-Díaz; Diego Andrés Prada; Gerardo Santamaría; Hector Alejandro Ruiz-Moreno; Jhonattan Reales-González; Jorge Rivera; Juan Camilo Martínez; Julian Naizaque; Katherine Laiton-Donato; Lisseth Pardo; Magdalena Wiesner; Marcela Mercado-Reyes; María T. Herrera-Sepúlveda; Marta Lopez Blanco; Martha Lucia Ospina Martínez; Paola Rojas; Patricia del Portillo; Sergio Gomez; Sheryll Corchuelo; Ángela Alarcon Cruz |
| EPI_ISL_3320745                                                                                                                                                                                                                                                                                                                                                                                                                                                                                                                                                                                                                                                                                                                                                                             | LDSP Norte de Santander                                 | Instituto Nacional de Salud                                               | Carlos Franco-Muñoz; Carmen Osorio; Diana Malo; Diego A. Álvarez-Díaz; Diego Andrés Prada; Gerardo Santamaría; Hector Alejandro Ruiz-Moreno; Jhonattan Reales-González; Jorge Rivera; Juan Camilo Martínez; Julian Naizaque; Katherine Laiton-Donato; Lisseth Pardo; Magdalena Wiesner; Marcela Mercado-Reyes; María T. Herrera-Sepúlveda; Marta Lopez Blanco; Martha Lucia Ospina Martínez; Paola Rojas; Sergio Gomez; Sheryll Corchuelo; Ángela Alarcon Cruz                                          |
| EPI_ISL_2894631, EPI_ISL_2894632, EPI_ISL_3385797, EPI_ISL_3385809, EPI_ISL_3385843, EPI_ISL_3385853                                                                                                                                                                                                                                                                                                                                                                                                                                                                                                                                                                                                                                                                                        | LDSP QUINDIO                                            | Instituto Nacional de Salud- Dirección de Investigación en Salud Pública  | Carlos Franco-Muñoz; Carmen Osorio; Diana Malo; Diego A. Álvarez-Díaz; Diego Andrés Prada; Gerardo Santamaría; Hector Alejandro Ruiz-Moreno; Jhonattan Reales-González; Jorge Rivera; Juan Camilo Martínez; Julian Naizaque; Katherine Laiton-Donato; Lisseth Pardo; Magdalena Wiesner; Marcela Mercado-Reyes; María T. Herrera-Sepúlveda; Marta Lopez Blanco; Martha Lucia Ospina Martínez; Paola Rojas; Sergio Gomez; Sheryll Corchuelo; Ángela Alarcon Cruz                                          |
| EPI_ISL_3921330, EPI_ISL_3921332, EPI_ISL_3921333, EPI_ISL_3921335, EPI_ISL_3921336, EPI_ISL_3921338, EPI_ISL_3921339, EPI_ISL_3921341, EPI_ISL_3921343, EPI_ISL_3921344, EPI_ISL_3921346, EPI_ISL_3921347, EPI_ISL_3921349, EPI_ISL_3921350, EPI_ISL_3921352, EPI_ISL_3921354, EPI_ISL_3921355, EPI_ISL_3921357, EPI_ISL_3921358, EPI_ISL_3921361, EPI_ISL_3921363, EPI_ISL_3921365, EPI_ISL_3921366, EPI_ISL_3921368, EPI_ISL_3921370, EPI_ISL_3921371, EPI_ISL_3921373, EPI_ISL_3921374, EPI_ISL_3921376, EPI_ISL_3921377, EPI_ISL_3921379, EPI_ISL_3921380, EPI_ISL_3921382, EPI_ISL_3921383, EPI_ISL_3921385, EPI_ISL_3921386, EPI_ISL_3921388, EPI_ISL_3921389, EPI_ISL_3921391, EPI_ISL_3921392, EPI_ISL_3921394, EPI_ISL_3921395, EPI_ISL_3921396, EPI_ISL_3921398, EPI_ISL_3921399 | see above                                               | LDSP SAN ANDRES ISLA                                                      | Instituto Nacional de Salud- Dirección de Investigación en Salud Pública                                                                                                                                                                                                                                                                                                                                                                                                                                |
| EPI_ISL_1820967, EPI_ISL_1820968, EPI_ISL_1821076, EPI_ISL_1821077, EPI_ISL_2674285, EPI_ISL_2828055, EPI_ISL_2828056                                                                                                                                                                                                                                                                                                                                                                                                                                                                                                                                                                                                                                                                       | see above                                               | LDSP SANTANDER                                                            | Instituto Nacional de Salud- Dirección de Investigación en Salud Pública                                                                                                                                                                                                                                                                                                                                                                                                                                |
| EPI_ISL_1805632, EPI_ISL_2158351, EPI_ISL_2674317, EPI_ISL_2674318, EPI_ISL_2674319                                                                                                                                                                                                                                                                                                                                                                                                                                                                                                                                                                                                                                                                                                         | LDSP TOLIMA                                             | Instituto Nacional de Salud- Dirección de Investigación en Salud Pública  | Carlos Franco-Muñoz; Carmen Osorio; Diana Malo; Diego A. Álvarez-Díaz; Diego Andrés Prada; Gerardo Santamaría; Hector Alejandro Ruiz-Moreno; Jhonattan Reales-González; Jorge Rivera; Juan Camilo Martínez; Julian Naizaque; Katherine Laiton-Donato; Lisseth Pardo; Magdalena Wiesner; Marcela Mercado-Reyes; María T. Herrera-Sepúlveda; Marta Lopez Blanco; Martha Lucia Ospina Martínez; Paola Rojas; Sergio Gomez; Sheryll Corchuelo; Ángela Alarcon Cruz                                          |
| EPI_ISL_1652044                                                                                                                                                                                                                                                                                                                                                                                                                                                                                                                                                                                                                                                                                                                                                                             | LDSP Tolima                                             | Instituto Nacional de Salud- Dirección de Investigación en Salud Pública  | Carlos Franco-Muñoz; Carmen Osorio; Christian Romero; Diana Malo; Diego A. Álvarez-Díaz; Diego Andrés Prada; Gerardo Santamaría; Hector Alejandro Ruiz-Moreno; Jhonattan Reales-González; Jorge Rivera; Juan Camilo Martínez; Julian Naizaque; Katherine Laiton-Donato; Lisseth Pardo; Magdalena Wiesner; Marcela Mercado-Reyes; María T. Herrera-Sepúlveda; Marta Lopez Blanco; Martha Lucia Ospina Martínez; Paola Rojas; Sergio Gomez; Sheryll Corchuelo; Ángela Alarcon Cruz                        |
| EPI_ISL_3385820                                                                                                                                                                                                                                                                                                                                                                                                                                                                                                                                                                                                                                                                                                                                                                             | LDSP VALLE DEL CAUCA                                    | Instituto Nacional de Salud- Dirección de Investigación en Salud Pública  | Carlos Franco-Muñoz; Carmen Osorio; Diana Malo; Diego A. Álvarez-Díaz; Diego Andrés Prada; Gerardo Santamaría; Hector Alejandro Ruiz-Moreno; Jhonattan Reales-González; Jorge Rivera; Juan Camilo Martínez; Julian Naizaque; Katherine Laiton-Donato; Lisseth Pardo; Magdalena Wiesner; Marcela Mercado-Reyes; María T. Herrera-Sepúlveda; Marta Lopez Blanco; Martha Lucia Ospina Martínez; Paola Rojas; Sergio Gomez; Sheryll Corchuelo; Ángela Alarcon Cruz                                          |
| EPI_ISL_1582987, EPI_ISL_1582997                                                                                                                                                                                                                                                                                                                                                                                                                                                                                                                                                                                                                                                                                                                                                            | LDSP VICHADA                                            | Instituto Nacional de Salud- Dirección de Investigación en Salud Pública  | Carlos Franco-Muñoz; Carmen Osorio; Diana Malo; Diego A. Álvarez-Díaz; Diego Andrés Prada; Gerardo Santamaría; Hector Alejandro Ruiz-Moreno; Jhonattan Reales-González; Juan Camilo Martínez; Julian Naizaque; Katherine Laiton-Donato; Lisseth Pardo; Magdalena Wiesner; Marcela Mercado-Reyes; María T. Herrera-Sepúlveda; Marta Lopez Blanco; Martha Lucia Ospina Martínez; Paola Rojas; Sergio Gomez; Sheryll Corchuelo; Ángela Alarcon Cruz                                                        |
| EPI_ISL_3007486                                                                                                                                                                                                                                                                                                                                                                                                                                                                                                                                                                                                                                                                                                                                                                             | LDSP VILLAVICENCIO - CLINICA PRIMAVERA DE VILLAVICENCIO | Instituto Nacional de Salud- Dirección de Investigación en Salud Pública  | Carlos Franco-Muñoz; Carmen Osorio; Diana Malo; Diego A. Álvarez-Díaz; Diego Andrés Prada; Gerardo Santamaría; Hector Alejandro Ruiz-Moreno; Jhonattan Reales-González; Jorge Rivera; Juan Camilo Martínez; Julian Naizaque; Katherine Laiton-Donato; Lisseth Pardo; Magdalena Wiesner; Marcela Mercado-Reyes; María T. Herrera-Sepúlveda; Marta Lopez Blanco; Martha Lucia Ospina Martínez; Paola Rojas; Sergio Gomez; Sheryll Corchuelo; Ángela Alarcon Cruz                                          |
| EPI_ISL_3342147, EPI_ISL_3342148, EPI_ISL_3342149, EPI_ISL_3342150, EPI_ISL_3342151, EPI_ISL_3342152                                                                                                                                                                                                                                                                                                                                                                                                                                                                                                                                                                                                                                                                                        | LIME                                                    | Laboratorio Departamental de Salud Publica de Antioquia                   | Andres F. Cardona-Rios; Gloria Isabel Escobar; Idabely Betancur Ortiz; Juan P. Hernandez-Ortiz; Maria Stella López                                                                                                                                                                                                                                                                                                                                                                                      |
| EPI_ISL_794652, EPI_ISL_794653                                                                                                                                                                                                                                                                                                                                                                                                                                                                                                                                                                                                                                                                                                                                                              | LSP DEL TOLIMA                                          | Instituto Nacional de Salud - Dirección de Investigación en Salud Pública | Carlos Franco-Muñoz; Diego A. Álvarez-Díaz; Diego Andrés Prada; Gerardo Santamaría; Jonathan Reales; Julian Naizaque; Katherine Laiton-Donato; Magdalena Wiesner; Marcela Mercado-Reyes; María T. Herrera; Martha Lucia Ospina Martínez; Mauricio Pacheco-Montealegre; Paola Muñoz-Laiton; Sheryll Corchuelo                                                                                                                                                                                            |
| EPI_ISL_4196882, EPI_ISL_4196883, EPI_ISL_4196884, EPI_ISL_4196885, EPI_ISL_4196886, EPI_ISL_4196887, EPI_ISL_4196888, EPI_ISL_4196889, EPI_ISL_4196890, EPI_ISL_4196891, EPI_ISL_4196892, EPI_ISL_4196893, EPI_ISL_4196894, EPI_ISL_4196895, EPI_ISL_4196896, EPI_ISL_4196897, EPI_ISL_4196898, EPI_ISL_4196899, EPI_ISL_4196900, EPI_ISL_4196901, EPI_ISL_4196902, EPI_ISL_4196903, EPI_ISL_4196904, EPI_ISL_4196905, EPI_ISL_4196906, EPI_ISL_4196907, EPI_ISL_4196908, EPI_ISL_4196909, EPI_ISL_4196910, EPI_ISL_4196911, EPI_ISL_4196912, EPI_ISL_4196913, EPI_ISL_4196914, EPI_ISL_4196915, EPI_ISL_4196916, EPI_ISL_4196917, EPI_ISL_4196918, EPI_ISL_4196922, EPI_ISL_4212128, EPI_ISL_4212129, EPI_ISL_4212130, EPI_ISL_4212131, EPI_ISL_4212132, EPI_ISL_4212133,                 |                                                         |                                                                           |                                                                                                                                                                                                                                                                                                                                                                                                                                                                                                         |





|                                                                                                                                                                                                                                                                                                                                                                                                                                                                                                                                                                                                                                                                                                                                                                            |                                               |                                                                                     |                                                                                                                                                                                                                                                        |                                                                                                                                                                                                                                                                                                                                                                                                                                                                                                        |
|----------------------------------------------------------------------------------------------------------------------------------------------------------------------------------------------------------------------------------------------------------------------------------------------------------------------------------------------------------------------------------------------------------------------------------------------------------------------------------------------------------------------------------------------------------------------------------------------------------------------------------------------------------------------------------------------------------------------------------------------------------------------------|-----------------------------------------------|-------------------------------------------------------------------------------------|--------------------------------------------------------------------------------------------------------------------------------------------------------------------------------------------------------------------------------------------------------|--------------------------------------------------------------------------------------------------------------------------------------------------------------------------------------------------------------------------------------------------------------------------------------------------------------------------------------------------------------------------------------------------------------------------------------------------------------------------------------------------------|
| EPI_ISL_3998113, EPI_ISL_3998114, EPI_ISL_3998131, EPI_ISL_3998134, EPI_ISL_3998137, EPI_ISL_3998138, EPI_ISL_3998142, EPI_ISL_3998143, EPI_ISL_3998158                                                                                                                                                                                                                                                                                                                                                                                                                                                                                                                                                                                                                    |                                               |                                                                                     |                                                                                                                                                                                                                                                        | Andrew S. Muñoz-Gamba; Daniel B. Ramírez-Osorio; Danis Lora; José A. Usme-Ciro; Lissette M. Lopez; Paula A. Quintero-Cortés                                                                                                                                                                                                                                                                                                                                                                            |
| see above                                                                                                                                                                                                                                                                                                                                                                                                                                                                                                                                                                                                                                                                                                                                                                  | Laboratorio Lorena Vejarano sede Barranquilla | Laboratorio de Biología Molecular, Universidad Cooperativa de Colombia, Santa Marta |                                                                                                                                                                                                                                                        |                                                                                                                                                                                                                                                                                                                                                                                                                                                                                                        |
| EPI_ISL_4297481, EPI_ISL_4297482, EPI_ISL_4297483, EPI_ISL_4297484, EPI_ISL_4297485, EPI_ISL_4297486, EPI_ISL_4297487, EPI_ISL_4297488, EPI_ISL_4297489, EPI_ISL_4297490, EPI_ISL_4297491, EPI_ISL_4297500, EPI_ISL_4297501, EPI_ISL_4297502                                                                                                                                                                                                                                                                                                                                                                                                                                                                                                                               | see above                                     | Laboratorio Masvida de la Costa                                                     | Centro de Genética y Biología Molecular - Universidad del Magdalena                                                                                                                                                                                    | Andrea M. Ramírez Hernandez; Angel Oviedo Marquez; Daniel Bautista; Edison Lea-Ch; Lyda R. Castro; Maria Teresa Mojica-Ortiz                                                                                                                                                                                                                                                                                                                                                                           |
| EPI_ISL_845628, EPI_ISL_845629                                                                                                                                                                                                                                                                                                                                                                                                                                                                                                                                                                                                                                                                                                                                             |                                               | Laboratorio Médico Echavarría                                                       | Instituto Nacional de Salud - Dirección de Investigación en Salud Pública                                                                                                                                                                              | Carlos Franco-Muñoz; Diego A. Álvarez-Díaz; Diego Andrés Prada; Gerardo Santamaría; Jonathan Reales; Julian Naizaque; Katherine Laiton-Donato; Magdalena Wiesner; Marcela Mercado-Reyes; María T. Herrera-Sepúlveda; Martha Lucia Ospina Martinez; Mauricio Pacheco-Montealegre; Paola Muñoz-Laiton; Sheryll Corchuelo                                                                                                                                                                                 |
| EPI_ISL_3278303, EPI_ISL_3320733, EPI_ISL_3320738, EPI_ISL_3320742, EPI_ISL_3320747, EPI_ISL_3320751                                                                                                                                                                                                                                                                                                                                                                                                                                                                                                                                                                                                                                                                       |                                               | Laboratorio Olimpus                                                                 | Instituto Nacional de Salud                                                                                                                                                                                                                            | Carlos Franco-Muñoz; Carmen Osorio; Diana Malo; Diego A. Álvarez-Díaz; Diego Andrés Prada; Gerardo Santamaría; Hector Alejandro Ruiz-Moreno; Jhonattan Reales-González; Jorge Rivera; Juan Camilo Martínez; Julian Naizaque; Katherine Laiton-Donato; Lisseth Pardo; Magdalena Wiesner; Marcela Mercado-Reyes; María T. Herrera-Sepúlveda; Marta Lopez Blanco; Martha Lucia Ospina Martinez; Paola Rojas; Sergio Gomez; Sheryll Corchuelo; Ángela Alarcon Cruz                                         |
| EPI_ISL_3320740                                                                                                                                                                                                                                                                                                                                                                                                                                                                                                                                                                                                                                                                                                                                                            |                                               | Laboratorio Previs IPS                                                              | Instituto Nacional de Salud                                                                                                                                                                                                                            | Carlos Franco-Muñoz; Carmen Osorio; Diana Malo; Diego A. Álvarez-Díaz; Diego Andrés Prada; Gerardo Santamaría; Hector Alejandro Ruiz-Moreno; Jhonattan Reales-González; Jorge Rivera; Juan Camilo Martínez; Julian Naizaque; Katherine Laiton-Donato; Lisseth Pardo; Magdalena Wiesner; Marcela Mercado-Reyes; María T. Herrera-Sepúlveda; Marta Lopez Blanco; Martha Lucia Ospina Martinez; Paola Rojas; Sergio Gomez; Sheryll Corchuelo; Ángela Alarcon Cruz                                         |
| EPI_ISL_4207325, EPI_ISL_4207326, EPI_ISL_4207327, EPI_ISL_4207328, EPI_ISL_4207329, EPI_ISL_4207330, EPI_ISL_4207331, EPI_ISL_4207332                                                                                                                                                                                                                                                                                                                                                                                                                                                                                                                                                                                                                                     | see above                                     | Laboratorio Prime Diagnostics                                                       | Corporación para Investigaciones Biológicas-CIB                                                                                                                                                                                                        | Jeanneth Mosquera Rendón; Katherine Molina Hoyos; Marcela Mercado Reyes; Uriel A. Hurtado Paez                                                                                                                                                                                                                                                                                                                                                                                                         |
| EPI_ISL_4297503, EPI_ISL_4297504, EPI_ISL_4297505, EPI_ISL_4297506, EPI_ISL_4297507, EPI_ISL_4297508, EPI_ISL_4297509                                                                                                                                                                                                                                                                                                                                                                                                                                                                                                                                                                                                                                                      | see above                                     | Laboratorio Rey-Fals                                                                | Centro de Genética y Biología Molecular - Universidad del Magdalena                                                                                                                                                                                    | Andrea M. Ramírez Hernandez; Angel Oviedo Marquez; Daniel Bautista; Edison Lea-Ch; Lyda R. Castro; Maria Teresa Mojica-Ortiz                                                                                                                                                                                                                                                                                                                                                                           |
| EPI_ISL_3307442, EPI_ISL_3307443, EPI_ISL_3307444, EPI_ISL_3307445, EPI_ISL_3307446, EPI_ISL_3307447, EPI_ISL_3307448, EPI_ISL_3307449, EPI_ISL_3307450, EPI_ISL_3307451, EPI_ISL_3307452, EPI_ISL_3307453, EPI_ISL_3307454, EPI_ISL_3307455, EPI_ISL_3307456, EPI_ISL_3307457, EPI_ISL_3307458, EPI_ISL_3332684, EPI_ISL_3332685, EPI_ISL_3332686, EPI_ISL_3332687, EPI_ISL_3332688                                                                                                                                                                                                                                                                                                                                                                                       | see above                                     | Laboratorio SYNLAB Colombia                                                         | Corporación para Investigaciones Biológicas-CIB                                                                                                                                                                                                        | Jeanneth Mosquera Rendón; Jenny Santiago Cuesta; Marcela Mercado Reyes; Uriel A. Hurtado Paez                                                                                                                                                                                                                                                                                                                                                                                                          |
| EPI_ISL_2674355, EPI_ISL_2674358, EPI_ISL_2674359, EPI_ISL_2674360, EPI_ISL_2674362, EPI_ISL_2674366, EPI_ISL_2674367                                                                                                                                                                                                                                                                                                                                                                                                                                                                                                                                                                                                                                                      | see above                                     | Laboratorio Salud Publica San Andres Islas                                          | Instituto Nacional de Salud- Dirección de Investigación en Salud Pública                                                                                                                                                                               | Carlos Franco-Muñoz; Carmen Osorio; Diana Malo; Diego A. Álvarez-Díaz; Diego Andrés Prada; Gerardo Santamaría; Hector Alejandro Ruiz-Moreno; Jhonattan Reales-González; Jorge Rivera; Juan Camilo Martínez; Julian Naizaque; Katherine Laiton-Donato; Lisseth Pardo; Magdalena Wiesner; Marcela Mercado-Reyes; María T. Herrera-Sepúlveda; Marta Lopez Blanco; Martha Lucia Ospina Martinez; Paola Rojas; Sergio Gomez; Sheryll Corchuelo; Ángela Alarcon Cruz                                         |
| EPI_ISL_2674363                                                                                                                                                                                                                                                                                                                                                                                                                                                                                                                                                                                                                                                                                                                                                            |                                               | Laboratorio Salud Publica- San Andres Islas                                         | Instituto Nacional de Salud- Dirección de Investigación en Salud Pública                                                                                                                                                                               | Carlos Franco-Muñoz; Carmen Osorio; Diana Malo; Diego A. Álvarez-Díaz; Diego Andrés Prada; Gerardo Santamaría; Hector Alejandro Ruiz-Moreno; Jhonattan Reales-González; Jorge Rivera; Juan Camilo Martínez; Julian Naizaque; Katherine Laiton-Donato; Lisseth Pardo; Magdalena Wiesner; Marcela Mercado-Reyes; María T. Herrera-Sepúlveda; Marta Lopez Blanco; Martha Lucia Ospina Martinez; Paola Rojas; Sergio Gomez; Sheryll Corchuelo; Ángela Alarcon Cruz                                         |
| EPI_ISL_3671003, EPI_ISL_3671019, EPI_ISL_3671036, EPI_ISL_3671039                                                                                                                                                                                                                                                                                                                                                                                                                                                                                                                                                                                                                                                                                                         |                                               | Laboratorio UNIGEM                                                                  | Universidad Nacional de Colombia - Laboratorio Genómico One Health                                                                                                                                                                                     | Andres F. Cardona-Rios; Carlos Franco-Muñoz; Carolina Muñoz-Arango; Celény Ortiz; Daniel O. Maldonado-Perez; Diego A. Álvarez-Díaz; Hector Alejandro Ruiz-Moreno; Idabely Betancur Ortiz; Jorge E. Osorio; Juan P. Hernandez-Ortiz; Karl A. Ciuderis; Katherine Laiton-Donato; Laura Silvana Perez; Lina M. Hurtado; Marcela Mercado-Reyes; Maria Angélica Maya; Maria Stella López; Rita Almanza Payares; Sandra Ines Cano; Simón Villegas Velásquez                                                  |
| EPI_ISL_3671006, EPI_ISL_3671016, EPI_ISL_3671040, EPI_ISL_3671042, EPI_ISL_3671053, EPI_ISL_3671063, EPI_ISL_3671064, EPI_ISL_3721596                                                                                                                                                                                                                                                                                                                                                                                                                                                                                                                                                                                                                                     | see above                                     | Laboratorio Yamina Cumplido                                                         | Universidad Nacional de Colombia - Laboratorio Genómico One Health                                                                                                                                                                                     | Andres F. Cardona-Rios; Carlos Franco-Muñoz; Carolina Muñoz-Arango; Celény Ortiz; Daniel O. Maldonado-Perez; Diego A. Álvarez-Díaz; Hector Alejandro Ruiz-Moreno; Idabely Betancur Ortiz; Jorge E. Osorio; Juan P. Hernandez-Ortiz; Karl A. Ciuderis; Katherine Laiton-Donato; Laura Silvana Perez; Lina M. Hurtado; Marcela Mercado-Reyes; Maria Angélica Maya; Maria Stella López; Rita Almanza Payares; Sandra Ines Cano; Simón Villegas Velásquez                                                  |
| EPI_ISL_3342899, EPI_ISL_3376685, EPI_ISL_3376686, EPI_ISL_3376687, EPI_ISL_3376688, EPI_ISL_3376689, EPI_ISL_3376690, EPI_ISL_3376691, EPI_ISL_3376692, EPI_ISL_3376693, EPI_ISL_3376694, EPI_ISL_3376695, EPI_ISL_3376696, EPI_ISL_3376697, EPI_ISL_3376698, EPI_ISL_3376699, EPI_ISL_3376700, EPI_ISL_3376701, EPI_ISL_3376702, EPI_ISL_3376703, EPI_ISL_3376704, EPI_ISL_3376705, EPI_ISL_3376706, EPI_ISL_3376707, EPI_ISL_3376708, EPI_ISL_3376709, EPI_ISL_3376710, EPI_ISL_3376711, EPI_ISL_3376712, EPI_ISL_3376713, EPI_ISL_3376714, EPI_ISL_3376715, EPI_ISL_3376716, EPI_ISL_3376717, EPI_ISL_3376718, EPI_ISL_3376719, EPI_ISL_3376720, EPI_ISL_3376721, EPI_ISL_3376722, EPI_ISL_3376723, EPI_ISL_3376724, EPI_ISL_3376725, EPI_ISL_3376726, EPI_ISL_3376727 | see above                                     | Laboratorio de Biología Molecular - Universidad del Magdalena                       | Centro de Genética y Biología Molecular - Universidad del Magdalena                                                                                                                                                                                    | Andrea M. Ramírez Hernandez; Angel Oviedo Marquez; Daniel Bautista; Edison Lea-Ch; Lyda R. Castro; Maria Teresa Mojica-Ortiz                                                                                                                                                                                                                                                                                                                                                                           |
| EPI_ISL_1582984, EPI_ISL_1582985, EPI_ISL_1582986, EPI_ISL_1582988, EPI_ISL_1582989, EPI_ISL_1582990                                                                                                                                                                                                                                                                                                                                                                                                                                                                                                                                                                                                                                                                       |                                               | Laboratorio de Biología Molecular - Universidad del Magdalena                       | Instituto Nacional de Salud- Dirección de Investigación en Salud Pública                                                                                                                                                                               | Carlos Franco-Muñoz; Carmen Osorio; Diana Malo; Diego A. Álvarez-Díaz; Diego Andrés Prada; Gerardo Santamaría; Hector Alejandro Ruiz-Moreno; Jhonattan Reales-González; Juan Camilo Martínez; Julian Naizaque; Katherine Laiton-Donato; Lisseth Pardo; Magdalena Wiesner; Marcela Mercado-Reyes; María T. Herrera-Sepúlveda; Marta Lopez Blanco; Martha Lucia Ospina Martinez; Paola Rojas; Sergio Gomez; Sheryll Corchuelo; Ángela Alarcon Cruz                                                       |
| EPI_ISL_2009062, EPI_ISL_2009067, EPI_ISL_2009068, EPI_ISL_2876096                                                                                                                                                                                                                                                                                                                                                                                                                                                                                                                                                                                                                                                                                                         |                                               | Laboratorio de Especialidades Clinizad                                              | Instituto Nacional de Salud- Dirección de Investigación en Salud Pública                                                                                                                                                                               | Carlos Franco-Muñoz; Carmen Osorio; Diana Malo; Diego A. Álvarez-Díaz; Diego Andrés Prada; Gerardo Santamaría; Hector Alejandro Ruiz-Moreno; Jhonattan Reales-González; Jorge Rivera; Juan Camilo Martínez; Julian Naizaque; Katherine Laiton-Donato; Lisseth Pardo; Magdalena Wiesner; Marcela Mercado-Reyes; María T. Herrera-Sepúlveda; Marta Lopez Blanco; Martha Lucia Ospina Martinez; Paola Rojas; Sergio Gomez; Sheryll Corchuelo; Ángela Alarcon Cruz                                         |
| EPI_ISL_2674329, EPI_ISL_2674330, EPI_ISL_2674331, EPI_ISL_2674332, EPI_ISL_2674333                                                                                                                                                                                                                                                                                                                                                                                                                                                                                                                                                                                                                                                                                        |                                               | Laboratorio de Inmunología y Biología Molecular                                     | Instituto Nacional de Salud- Dirección de Investigación en Salud Pública                                                                                                                                                                               | Carlos Franco-Muñoz; Carmen Osorio; Diana Malo; Diego A. Álvarez-Díaz; Diego Andrés Prada; Gerardo Santamaría; Hector Alejandro Ruiz-Moreno; Jhonattan Reales-González; Jorge Rivera; Juan Camilo Martínez; Julian Naizaque; Katherine Laiton-Donato; Lisseth Pardo; Magdalena Wiesner; Marcela Mercado-Reyes; María T. Herrera-Sepúlveda; Marta Lopez Blanco; Martha Lucia Ospina Martinez; Paola Rojas; Sergio Gomez; Sheryll Corchuelo; Ángela Alarcon Cruz                                         |
| EPI_ISL_2674364, EPI_ISL_2674365                                                                                                                                                                                                                                                                                                                                                                                                                                                                                                                                                                                                                                                                                                                                           |                                               | Laboratorio de Salud Publica                                                        | Instituto Nacional de Salud- Dirección de Investigación en Salud Pública                                                                                                                                                                               | Carlos Franco-Muñoz; Carmen Osorio; Diana Malo; Diego A. Álvarez-Díaz; Diego Andrés Prada; Gerardo Santamaría; Hector Alejandro Ruiz-Moreno; Jhonattan Reales-González; Jorge Rivera; Juan Camilo Martínez; Julian Naizaque; Katherine Laiton-Donato; Lisseth Pardo; Magdalena Wiesner; Marcela Mercado-Reyes; María T. Herrera-Sepúlveda; Marta Lopez Blanco; Martha Lucia Ospina Martinez; Paola Rojas; Sergio Gomez; Sheryll Corchuelo; Ángela Alarcon Cruz                                         |
| EPI_ISL_1494941, EPI_ISL_1494942, EPI_ISL_1494943                                                                                                                                                                                                                                                                                                                                                                                                                                                                                                                                                                                                                                                                                                                          |                                               | Laboratorio de Salud Publica Arauca                                                 | Instituto Nacional de Salud- Dirección de Investigación en Salud Pública                                                                                                                                                                               | Carlos Franco-Muñoz; Carmen Osorio; Diana Malo; Diego A. Álvarez-Díaz; Diego Andrés Prada; Gerardo Santamaría; Hector Alejandro Ruiz-Moreno; Jhonattan Reales-González; Juan Camilo Martínez; Julian Naizaque; Katherine Laiton-Donato; Lisseth Pardo; Magdalena Wiesner; Marcela Mercado-Reyes; María T. Herrera-Sepúlveda; Marta Lopez Blanco; Martha Lucia Ospina Martinez; Paola Rojas; Sergio Gomez; Sheryll Corchuelo; Ángela Alarcon Cruz                                                       |
| EPI_ISL_2674353, EPI_ISL_2674354, EPI_ISL_2674361                                                                                                                                                                                                                                                                                                                                                                                                                                                                                                                                                                                                                                                                                                                          |                                               | Laboratorio de Salud Publica San Andrés Islas                                       | Instituto Nacional de Salud- Dirección de Investigación en Salud Pública                                                                                                                                                                               | Carlos Franco-Muñoz; Carmen Osorio; Diana Malo; Diego A. Álvarez-Díaz; Diego Andrés Prada; Gerardo Santamaría; Hector Alejandro Ruiz-Moreno; Jhonattan Reales-González; Jorge Rivera; Juan Camilo Martínez; Julian Naizaque; Katherine Laiton-Donato; Lisseth Pardo; Magdalena Wiesner; Marcela Mercado-Reyes; María T. Herrera-Sepúlveda; Marta Lopez Blanco; Martha Lucia Ospina Martinez; Paola Rojas; Sergio Gomez; Sheryll Corchuelo; Ángela Alarcon Cruz                                         |
| EPI_ISL_906144, EPI_ISL_906145, EPI_ISL_906534, EPI_ISL_906557, EPI_ISL_906558, EPI_ISL_906559, EPI_ISL_906560, EPI_ISL_906561                                                                                                                                                                                                                                                                                                                                                                                                                                                                                                                                                                                                                                             | see above                                     | Laboratorio de Salud Publica de Amazonas                                            | Instituto Nacional de Salud- Dirección de Investigación en Salud Pública, Universidad de los Andes- Applied genomics research group, Vicerrectoria de Investigación y Creación, Universidad de los Andes- Systems and Computing Engineering Department | Carlos Franco-Muñoz; Diego A. Álvarez-Díaz; Diego Andrés Prada; Gerardo Santamaría Jorge Duitama; Héctor Alejandro Ruiz-Moreno; Jhonattan Reales-González; Jorge Ivan Diaz; Julian Naizaque; Katherine Laiton-Donato; Laura Natalia Gonzalez; Magdalena Wiesner; Marcela Mercado-Reyes; María T. Herrera-Sepúlveda; Martha Lucia Ospina Martinez; Mauricio Pacheco-Montealegre; Sheryll Corchuelo; Silvia Restrepo-Restrepo                                                                            |
| EPI_ISL_1092008                                                                                                                                                                                                                                                                                                                                                                                                                                                                                                                                                                                                                                                                                                                                                            |                                               | Laboratorio de Salud Publica de Bogota                                              | Instituto Nacional de Salud- Dirección de Investigación en Salud Pública                                                                                                                                                                               | Carlos Franco-Muñoz; Diego A. Álvarez-Díaz; Diego Andrés Prada; Gerardo Santamaría; Hector Alejandro Ruiz-Moreno; Jhonattan Reales-González; Julian Naizaque; Katherine Laiton-Donato; Magdalena Wiesner; Marcela Mercado-Reyes; María T. Herrera-Sepúlveda; Martha Lucia Ospina Martinez; Sheryll Corchuelo                                                                                                                                                                                           |
| EPI_ISL_1137615, EPI_ISL_1137619                                                                                                                                                                                                                                                                                                                                                                                                                                                                                                                                                                                                                                                                                                                                           |                                               | Laboratorio de Salud Publica de Cauca                                               | Instituto Nacional de Salud- Dirección de Investigación en Salud Pública                                                                                                                                                                               | Carlos Franco-Muñoz; Diego A. Álvarez-Díaz; Diego Andrés Prada; Gerardo Santamaría; Hector Alejandro Ruiz-Moreno; Jhonattan Reales-González; Julian Naizaque; Katherine Laiton-Donato; Magdalena Wiesner; Marcela Mercado-Reyes; María T. Herrera-Sepúlveda; Martha Lucia Ospina Martinez; Sheryll Corchuelo                                                                                                                                                                                           |
| EPI_ISL_1092005                                                                                                                                                                                                                                                                                                                                                                                                                                                                                                                                                                                                                                                                                                                                                            |                                               | Laboratorio de Salud Publica de Cesar                                               | Instituto Nacional de Salud- Dirección de Investigación en Salud Pública                                                                                                                                                                               | Carlos Franco-Muñoz; Diego A. Álvarez-Díaz; Diego Andrés Prada; Gerardo Santamaría; Hector Alejandro Ruiz-Moreno; Jhonattan Reales-González; Julian Naizaque; Katherine Laiton-Donato; Magdalena Wiesner; Marcela Mercado-Reyes; María T. Herrera-Sepúlveda; Martha Lucia Ospina Martinez; Sheryll Corchuelo                                                                                                                                                                                           |
| EPI_ISL_4196881                                                                                                                                                                                                                                                                                                                                                                                                                                                                                                                                                                                                                                                                                                                                                            |                                               | Laboratorio de Salud Publica de Cundinamarca                                        | Gencore - Universidad de los Andes                                                                                                                                                                                                                     | Cristian Barrera; Gabriela Ariza; Luisa Sacristan; Marcela Guevara; Marcela Mercado; Silvia Restrepo                                                                                                                                                                                                                                                                                                                                                                                                   |
| EPI_ISL_1494950                                                                                                                                                                                                                                                                                                                                                                                                                                                                                                                                                                                                                                                                                                                                                            |                                               | Laboratorio de Salud Publica de Santander                                           | Instituto Nacional de Salud- Dirección de Investigación en Salud Pública                                                                                                                                                                               | Carlos Franco-Muñoz; Carmen Osorio; Diana Malo; Diego A. Álvarez-Díaz; Diego Andrés Prada; Gerardo Santamaría; Hector Alejandro Ruiz-Moreno; Jhonattan Reales-González; Juan Camilo Martínez; Julian Naizaque; Katherine Laiton-Donato; Lisseth Pardo; Magdalena Wiesner; Marcela Mercado-Reyes; María T. Herrera-Sepúlveda; Marta Lopez Blanco; Martha Lucia Ospina Martinez; Paola Rojas; Sergio Gomez; Sheryll Corchuelo; Ángela Alarcon Cruz                                                       |
| EPI_ISL_2157202, EPI_ISL_2157203, EPI_ISL_2157204, EPI_ISL_2157205, EPI_ISL_2157206, EPI_ISL_2157207, EPI_ISL_2157208, EPI_ISL_2157209, EPI_ISL_2157210, EPI_ISL_2157213                                                                                                                                                                                                                                                                                                                                                                                                                                                                                                                                                                                                   | see above                                     | Laboratorio de Salud Pública                                                        | Gencore - Universidad de los Andes                                                                                                                                                                                                                     | Alejandro Gomez; David Gonzalez; Gabriela Delgado; Johana Hernandez; Luisa Sacristan; Marcela Guevara; Silvia Restrepo                                                                                                                                                                                                                                                                                                                                                                                 |
| EPI_ISL_1235686                                                                                                                                                                                                                                                                                                                                                                                                                                                                                                                                                                                                                                                                                                                                                            |                                               | Laboratorio de Salud Pública (Bogota)                                               | Gencore- Universidad de los Andes                                                                                                                                                                                                                      | Alejandro Gómez; David González; Johana Hernandez Gabriela Delgado; Luisa Sacristán; Marcela Guevara-Suarez; Silvia Restrepo                                                                                                                                                                                                                                                                                                                                                                           |
| EPI_ISL_845635, EPI_ISL_845636, EPI_ISL_845637, EPI_ISL_845638, EPI_ISL_845639, EPI_ISL_845640, EPI_ISL_845641, EPI_ISL_845642, EPI_ISL_845643, EPI_ISL_845644, EPI_ISL_845645, EPI_ISL_845646, EPI_ISL_845647, EPI_ISL_845648, EPI_ISL_845649, EPI_ISL_845650, EPI_ISL_845651, EPI_ISL_845652, EPI_ISL_845653, EPI_ISL_845654, EPI_ISL_845655                                                                                                                                                                                                                                                                                                                                                                                                                             | see above                                     | Laboratorio de Salud Pública - Secretaría Distrital de Salud                        | Instituto Nacional de Salud - Dirección de Investigación en Salud Pública                                                                                                                                                                              | Carlos Franco-Muñoz; Diego A. Álvarez-Díaz; Diego Andrés Prada; Gerardo Santamaría; Jonathan Reales; Julian Naizaque; Katherine Laiton-Donato; Magdalena Wiesner; Marcela Mercado-Reyes; María T. Herrera-Sepúlveda; Martha Lucia Ospina Martinez; Mauricio Pacheco-Montealegre; Paola Muñoz-Laiton; Sheryll Corchuelo                                                                                                                                                                                 |
| EPI_ISL_1137478, EPI_ISL_1303378, EPI_ISL_1303379, EPI_ISL_1303380, EPI_ISL_1494959                                                                                                                                                                                                                                                                                                                                                                                                                                                                                                                                                                                                                                                                                        |                                               | Laboratorio de Salud Pública - Secretaría Distrital de Salud                        | Instituto Nacional de Salud- Dirección de Investigación en Salud Pública                                                                                                                                                                               | Carlos Franco-Muñoz; Carmen Osorio; Diana Malo; Diego A. Álvarez-Díaz; Diego Andrés Prada; Gerardo Santamaría; Hector Alejandro Ruiz-Moreno; Jhonattan Reales-González; Juan Camilo Martínez; Julian Naizaque; Katherine Laiton-Donato; Lisseth Pardo; Magdalena Wiesner; Marcela Mercado-Reyes; Marcela Mercado-Reyes.; María T. Herrera-Sepúlveda; Marta Lopez Blanco; Martha Lucia Ospina Martinez; Martha Lucia Ospina Martinez; Paola Rojas; Sergio Gomez; Sheryll Corchuelo; Ángela Alarcon Cruz |
| EPI_ISL_1626617, EPI_ISL_1626618, EPI_ISL_1626619, EPI_ISL_1626620, EPI_ISL_1626621, EPI_ISL_1738781, EPI_ISL_1738782, EPI_ISL_1738783, EPI_ISL_1738784, EPI_ISL_1738785, EPI_ISL_1738786, EPI_ISL_1738787, EPI_ISL_1738788, EPI_ISL_1738789, EPI_ISL_1738790                                                                                                                                                                                                                                                                                                                                                                                                                                                                                                              | see above                                     | Laboratorio de Salud Pública Bogota                                                 | Gencore - Universidad de los Andes                                                                                                                                                                                                                     | Alejandro Gomez; Ana Maria Palacio; David Gonzalez; Gabriela Delgado; Johana Hernandez; Luisa Sacristan; Marcela Guevara; Silvia Restrepo                                                                                                                                                                                                                                                                                                                                                              |
| EPI_ISL_2657859, EPI_ISL_2657860, EPI_ISL_2657861, EPI_ISL_2657862, EPI_ISL_2657863, EPI_ISL_2657864                                                                                                                                                                                                                                                                                                                                                                                                                                                                                                                                                                                                                                                                       |                                               | Laboratorio de Salud Pública Fronterizo de Arauca                                   | Instituto Nacional de Salud- Dirección de Investigación en Salud Pública                                                                                                                                                                               | Carlos Franco-Muñoz; Carmen Osorio; Diana Malo; Diego A. Álvarez-Díaz; Diego Andrés Prada; Gerardo Santamaría; Hector Alejandro Ruiz-Moreno; Jhonattan Reales-González; Jorge Rivera; Juan Camilo Martínez; Julian Naizaque; Katherine Laiton-Donato; Lisseth Pardo; Magdalena Wiesner; Marcela Mercado-Reyes; María T. Herrera-Sepúlveda; Marta Lopez Blanco; Martha Lucia Ospina Martinez; Paola Rojas; Sergio Gomez; Sheryll Corchuelo; Ángela Alarcon Cruz                                         |
| EPI_ISL_906548                                                                                                                                                                                                                                                                                                                                                                                                                                                                                                                                                                                                                                                                                                                                                             |                                               | Laboratorio de Salud Pública Fronterizo de Arauca                                   | Instituto Nacional de Salud- Dirección de Investigación en Salud Pública, Universidad de los Andes- Applied genomics research group, Vicerrectoria de Investigación y Creación, Universidad de los Andes- Systems and Computing Engineering Department | Carlos Franco-Muñoz; Diego A. Álvarez-Díaz; Diego Andrés Prada; Gerardo Santamaría Jorge Duitama; Héctor Alejandro Ruiz-Moreno; Jhonattan Reales-González; Jorge Ivan Diaz; Julian Naizaque; Katherine Laiton-Donato; Laura Natalia Gonzalez; Magdalena Wiesner; Marcela Mercado-Reyes; María T. Herrera-Sepúlveda; Martha Lucia Ospina Martinez; Mauricio Pacheco-Montealegre; Sheryll Corchuelo; Silvia Restrepo-Restrepo                                                                            |
| EPI_ISL_1582995                                                                                                                                                                                                                                                                                                                                                                                                                                                                                                                                                                                                                                                                                                                                                            |                                               | Laboratorio de Salud Pública de Amazonas                                            | Instituto Nacional de Salud- Dirección de Investigación en Salud Pública                                                                                                                                                                               | Carlos Franco-Muñoz; Carmen Osorio; Diana Malo; Diego A. Álvarez-Díaz; Diego Andrés Prada; Gerardo Santamaría; Hector Alejandro Ruiz-Moreno; Jhonattan Reales-González; Juan Camilo Martínez; Julian Naizaque; Katherine Laiton-Donato; Lisseth Pardo; Magdalena Wiesner; Marcela Mercado-Reyes; María T. Herrera-Sepúlveda; Marta Lopez Blanco; Martha Lucia Ospina Martinez; Paola Rojas; Sergio Gomez; Sheryll Corchuelo; Ángela Alarcon Cruz                                                       |





| Universidad de Cartagena                                                                                                                                                                                                                                                                                                                                                                                                                                                                                                                                                                                                                                                                                                                                                                                                                                                                                                                                                                                                                                                                                                                                                                                                                                                                                                                                                                                                                                                                                                                                                                                                                                                                                                                                                                                                                                                                                                                     |           |                                                                                                                 |                                                                                                                                                    |                                                                                                                                                                                                                                                                                                                                                                                                                                                                                                         |                                                                                                                                                                                                                                                                                                                                                                                                                                                       |
|----------------------------------------------------------------------------------------------------------------------------------------------------------------------------------------------------------------------------------------------------------------------------------------------------------------------------------------------------------------------------------------------------------------------------------------------------------------------------------------------------------------------------------------------------------------------------------------------------------------------------------------------------------------------------------------------------------------------------------------------------------------------------------------------------------------------------------------------------------------------------------------------------------------------------------------------------------------------------------------------------------------------------------------------------------------------------------------------------------------------------------------------------------------------------------------------------------------------------------------------------------------------------------------------------------------------------------------------------------------------------------------------------------------------------------------------------------------------------------------------------------------------------------------------------------------------------------------------------------------------------------------------------------------------------------------------------------------------------------------------------------------------------------------------------------------------------------------------------------------------------------------------------------------------------------------------|-----------|-----------------------------------------------------------------------------------------------------------------|----------------------------------------------------------------------------------------------------------------------------------------------------|---------------------------------------------------------------------------------------------------------------------------------------------------------------------------------------------------------------------------------------------------------------------------------------------------------------------------------------------------------------------------------------------------------------------------------------------------------------------------------------------------------|-------------------------------------------------------------------------------------------------------------------------------------------------------------------------------------------------------------------------------------------------------------------------------------------------------------------------------------------------------------------------------------------------------------------------------------------------------|
| EPI_ISL_2828019, EPI_ISL_2828020, EPI_ISL_2828021, EPI_ISL_2828022, EPI_ISL_2828023, EPI_ISL_2828024, EPI_ISL_2828025, EPI_ISL_2828026, EPI_ISL_2828027, EPI_ISL_2828028, EPI_ISL_2828029, EPI_ISL_2828030, EPI_ISL_2828031, EPI_ISL_2828032, EPI_ISL_2828033, EPI_ISL_2828034, EPI_ISL_2828035, EPI_ISL_2828036, EPI_ISL_2828037, EPI_ISL_2828038                                                                                                                                                                                                                                                                                                                                                                                                                                                                                                                                                                                                                                                                                                                                                                                                                                                                                                                                                                                                                                                                                                                                                                                                                                                                                                                                                                                                                                                                                                                                                                                           | see above | Unidad de Investigación Molecular (UNIMOL)                                                                      | Instituto Nacional de Salud- Dirección de Investigación en Salud Pública                                                                           | Carlos Franco-Muñoz; Carmen Osorio; Diana Malo; Diego A. Álvarez-Díaz; Diego Andrés Prada; Gerardo Santamaría; Hector Alejandro Ruiz-Moreno; Jhonnatan Reales-González; Jorge Rivera; Juan Camilo Martínez; Julian Naizaque; Katherine Laiton-Donato; Lisseth Pardo; Magdalena Wiesner; Marcela Mercado-Reyes; María T. Herrera-Sepúlveda; Marta Lopez Blanco; Martha Lucia Ospina Martínez; Paola Rojas; Sergio Gomez; Sheryll Corchuelo; Ángela Alarcon Cruz                                          |                                                                                                                                                                                                                                                                                                                                                                                                                                                       |
| EPI_ISL_4081112, EPI_ISL_4081113                                                                                                                                                                                                                                                                                                                                                                                                                                                                                                                                                                                                                                                                                                                                                                                                                                                                                                                                                                                                                                                                                                                                                                                                                                                                                                                                                                                                                                                                                                                                                                                                                                                                                                                                                                                                                                                                                                             |           | Universidad Cartagena Laboratorio UNIMOL                                                                        | Instituto Nacional de Salud- Dirección de Investigación en Salud Pública                                                                           | Carlos Franco-Muñoz; Carmen Osorio; Diana Malo; Diego A. Álvarez-Díaz; Diego Andrés Prada; Gerardo Santamaría; Hector Alejandro Ruiz-Moreno; Jhonnatan Reales-González; Jorge Rivera; Juan Camilo Martínez; Julian Naizaque; Katherine Laiton-Donato; Lisseth Pardo; Magdalena Wiesner; Marcela Mercado-Reyes; María T. Herrera-Sepúlveda; Marta Lopez Blanco; Martha Lucia Ospina Martínez; Paola Rojas; Sergio Gomez; Sheryll Corchuelo; Ángela Alarcon Cruz                                          |                                                                                                                                                                                                                                                                                                                                                                                                                                                       |
| EPI_ISL_1628499                                                                                                                                                                                                                                                                                                                                                                                                                                                                                                                                                                                                                                                                                                                                                                                                                                                                                                                                                                                                                                                                                                                                                                                                                                                                                                                                                                                                                                                                                                                                                                                                                                                                                                                                                                                                                                                                                                                              |           | Universidad Industrial de Santander (Laboratorio Central de Investigaciones - Clínica Chicamocha).              | Universidad Industrial de Santander                                                                                                                | Carlos Barrios-Hernández; Carolina S. Torres-Jiménez; Cristian E. Cadena-Caballero; Diego Rueda-Plata; Erika Lizarazo-Gutiérrez; Francisco Martínez-Perez; Lina M. Vera-Cala.; Lizeth J. Forero-Butrago                                                                                                                                                                                                                                                                                                 |                                                                                                                                                                                                                                                                                                                                                                                                                                                       |
| EPI_ISL_1576835, EPI_ISL_1577026, EPI_ISL_1577182, EPI_ISL_1577390, EPI_ISL_1582589, EPI_ISL_1582590, EPI_ISL_1628474, EPI_ISL_1629710, EPI_ISL_1629711                                                                                                                                                                                                                                                                                                                                                                                                                                                                                                                                                                                                                                                                                                                                                                                                                                                                                                                                                                                                                                                                                                                                                                                                                                                                                                                                                                                                                                                                                                                                                                                                                                                                                                                                                                                      | see above | Universidad Industrial de Santander (Laboratorio Central de Investigaciones - Clínica Chicamocha).              | Universidad Industrial de Santander.                                                                                                               | Carlos Barrios-Hernández; Carolina S. Torres-Jiménez; Cristian E. Cadena-Caballero; Diego Rueda-Plata; Erika Lizarazo-Gutiérrez; Francisco Martínez-Perez; Lina M. Vera-Cala.; Lizeth J. Forero-Butrago                                                                                                                                                                                                                                                                                                 |                                                                                                                                                                                                                                                                                                                                                                                                                                                       |
| EPI_ISL_3390788, EPI_ISL_3390789, EPI_ISL_3390790, EPI_ISL_3390791, EPI_ISL_3390792, EPI_ISL_3390793, EPI_ISL_3390794, EPI_ISL_3390795, EPI_ISL_3390796, EPI_ISL_3390797, EPI_ISL_3390798, EPI_ISL_3390810, EPI_ISL_3390811, EPI_ISL_3390812, EPI_ISL_3390813, EPI_ISL_3390814, EPI_ISL_3390815, EPI_ISL_3390816, EPI_ISL_3390817, EPI_ISL_3390818, EPI_ISL_3390819, EPI_ISL_3390820, EPI_ISL_3390821, EPI_ISL_3390822, EPI_ISL_3390823, EPI_ISL_3390824, EPI_ISL_3390825, EPI_ISL_3390826, EPI_ISL_3390827, EPI_ISL_3390828, EPI_ISL_3390829, EPI_ISL_3390830, EPI_ISL_3390831, EPI_ISL_3390832, EPI_ISL_3390833, EPI_ISL_3390834, EPI_ISL_3390835, EPI_ISL_3390836, EPI_ISL_3390837, EPI_ISL_3390838, EPI_ISL_3390839, EPI_ISL_3390840, EPI_ISL_3390841, EPI_ISL_3390842, EPI_ISL_3390843, EPI_ISL_3390844, EPI_ISL_3390845, EPI_ISL_3390846, EPI_ISL_3390847, EPI_ISL_3390848, EPI_ISL_3390849, EPI_ISL_3390850, EPI_ISL_3390851, EPI_ISL_3390852, EPI_ISL_3390853, EPI_ISL_3390854, EPI_ISL_3390855, EPI_ISL_3390856, EPI_ISL_3390857, EPI_ISL_3390858, EPI_ISL_3390859, EPI_ISL_3390860, EPI_ISL_3390861, EPI_ISL_3390862, EPI_ISL_3390863, EPI_ISL_3390864, EPI_ISL_3390865, EPI_ISL_3390866, EPI_ISL_3390867, EPI_ISL_3390868, EPI_ISL_3390869, EPI_ISL_3390870, EPI_ISL_3390871, EPI_ISL_3390872, EPI_ISL_3390873, EPI_ISL_3390874, EPI_ISL_3390875, EPI_ISL_3390876, EPI_ISL_3390877, EPI_ISL_3390878, EPI_ISL_3390879, EPI_ISL_3390880, EPI_ISL_3390881, EPI_ISL_3390882, EPI_ISL_3390883, EPI_ISL_3390884, EPI_ISL_3390885, EPI_ISL_3390886, EPI_ISL_3390887, EPI_ISL_3390888, EPI_ISL_3390889, EPI_ISL_3390890, EPI_ISL_3390901, EPI_ISL_3390902, EPI_ISL_3390903, EPI_ISL_3390904, EPI_ISL_3390905, EPI_ISL_3390906, EPI_ISL_3390907                                                                                                                                                                                            | see above | Universidad Nacional Bogota                                                                                     | UNAL                                                                                                                                               | Universidad Nacional de Colombia                                                                                                                                                                                                                                                                                                                                                                                                                                                                        | Andres F. Cardona-Rios; Carlos Franco-Muñoz; Carolina Muñoz-Arango; Celency Ortiz; Daniel O. Maldonado-Perez; Diego A. Álvarez-Díaz; Hector Alejandro Ruiz-Moreno; Idabely Betancur Ortiz; Jorge E. Osorio; Juan P. Hernandez-Ortiz; Karl A Ciuderos; Katherine Laiton-Donato; Laura Silvana Perez; Lina M. Hurtado; Marcela Mercado-Reyes; María Angélica Maya; María Stella López; Rita Almanza Payares; Sandra Ines Cano; Simón Villegas Velásquez |
| EPI_ISL_1675332, EPI_ISL_1675333, EPI_ISL_1675334, EPI_ISL_1824711, EPI_ISL_1824712, EPI_ISL_1824713, EPI_ISL_1824714, EPI_ISL_1824715, EPI_ISL_2438094, EPI_ISL_2438098, EPI_ISL_2438101, EPI_ISL_2651232, EPI_ISL_3276644, EPI_ISL_3276645, EPI_ISL_3276646, EPI_ISL_3276647, EPI_ISL_3276648, EPI_ISL_3276649, EPI_ISL_3276650, EPI_ISL_3276651, EPI_ISL_3276652                                                                                                                                                                                                                                                                                                                                                                                                                                                                                                                                                                                                                                                                                                                                                                                                                                                                                                                                                                                                                                                                                                                                                                                                                                                                                                                                                                                                                                                                                                                                                                          | see above | Universidad Nacional de Colombia - Laboratorio Genómico One Health                                              | Universidad Nacional de Colombia - Laboratorio Genómico One Health                                                                                 | Andres F. Cardona-Rios; Carlos Franco-Muñoz; Carolina Muñoz-Arango; Celency Ortiz; Daniel O. Maldonado-Perez; Diego A. Álvarez-Díaz; Hector Alejandro Ruiz-Moreno; Idabely Betancur Ortiz; Jorge E. Osorio; Juan P. Hernandez-Ortiz; Karl A Ciuderos; Katherine Laiton-Donato; Laura Silvana Perez; Lina M. Hurtado; Marcela Mercado-Reyes; María Angélica Maya; María Stella López; Rita Almanza Payares; Sandra Ines Cano; Simón Villegas Velásquez                                                   |                                                                                                                                                                                                                                                                                                                                                                                                                                                       |
| EPI_ISL_3671011, EPI_ISL_3671020, EPI_ISL_3671028, EPI_ISL_3721607, EPI_ISL_3721611                                                                                                                                                                                                                                                                                                                                                                                                                                                                                                                                                                                                                                                                                                                                                                                                                                                                                                                                                                                                                                                                                                                                                                                                                                                                                                                                                                                                                                                                                                                                                                                                                                                                                                                                                                                                                                                          |           | Universidad Nacional sede Medellín Laboratorio One Health                                                       | Universidad Nacional de Colombia - Laboratorio Genómico One Health                                                                                 | Andres F. Cardona-Rios; Carlos Franco-Muñoz; Carolina Muñoz-Arango; Celency Ortiz; Daniel O. Maldonado-Perez; Diego A. Álvarez-Díaz; Hector Alejandro Ruiz-Moreno; Idabely Betancur Ortiz; Jorge E. Osorio; Juan P. Hernandez-Ortiz; Karl A Ciuderos; Katherine Laiton-Donato; Laura Silvana Perez; Lina M. Hurtado; Marcela Mercado-Reyes; María Angélica Maya; María Stella López; Rita Almanza Payares; Sandra Ines Cano; Simón Villegas Velásquez                                                   |                                                                                                                                                                                                                                                                                                                                                                                                                                                       |
| EPI_ISL_4297510, EPI_ISL_4297511, EPI_ISL_4297512, EPI_ISL_4297513, EPI_ISL_4297514, EPI_ISL_4297515, EPI_ISL_4297516, EPI_ISL_4297517                                                                                                                                                                                                                                                                                                                                                                                                                                                                                                                                                                                                                                                                                                                                                                                                                                                                                                                                                                                                                                                                                                                                                                                                                                                                                                                                                                                                                                                                                                                                                                                                                                                                                                                                                                                                       | see above | Universidad Simón Bolívar                                                                                       | Centro de Genética y Biología Molecular - Universidad del Magdalena                                                                                | Andrea M. Ramírez Hernandez; Angel Oviedo Marquez; Daniel Bautista; Edison Lea-Ch; Lyda R. Castro; Maria Teresa Mojica-Ortiz                                                                                                                                                                                                                                                                                                                                                                            |                                                                                                                                                                                                                                                                                                                                                                                                                                                       |
| EPI_ISL_3671022, EPI_ISL_3671046                                                                                                                                                                                                                                                                                                                                                                                                                                                                                                                                                                                                                                                                                                                                                                                                                                                                                                                                                                                                                                                                                                                                                                                                                                                                                                                                                                                                                                                                                                                                                                                                                                                                                                                                                                                                                                                                                                             |           | Universidad de Antioquia Laboratorio LIME                                                                       | Universidad Nacional de Colombia - Laboratorio Genómico One Health                                                                                 | Andres F. Cardona-Rios; Carlos Franco-Muñoz; Carolina Muñoz-Arango; Celency Ortiz; Daniel O. Maldonado-Perez; Diego A. Álvarez-Díaz; Hector Alejandro Ruiz-Moreno; Idabely Betancur Ortiz; Jorge E. Osorio; Juan P. Hernandez-Ortiz; Karl A Ciuderos; Katherine Laiton-Donato; Laura Silvana Perez; Lina M. Hurtado; Marcela Mercado-Reyes; María Angélica Maya; María Stella López; Rita Almanza Payares; Sandra Ines Cano; Simón Villegas Velásquez                                                   |                                                                                                                                                                                                                                                                                                                                                                                                                                                       |
| EPI_ISL_3721586, EPI_ISL_3721592, EPI_ISL_3721599, EPI_ISL_3721601, EPI_ISL_3721605, EPI_ISL_3721622                                                                                                                                                                                                                                                                                                                                                                                                                                                                                                                                                                                                                                                                                                                                                                                                                                                                                                                                                                                                                                                                                                                                                                                                                                                                                                                                                                                                                                                                                                                                                                                                                                                                                                                                                                                                                                         |           | Universidad de Caldas                                                                                           | Universidad Nacional de Colombia - Laboratorio Genómico One Health                                                                                 | Andres F. Cardona-Rios; Carlos Franco-Muñoz; Carolina Muñoz-Arango; Celency Ortiz; Daniel O. Maldonado-Perez; Diego A. Álvarez-Díaz; Hector Alejandro Ruiz-Moreno; Idabely Betancur Ortiz; Jorge E. Osorio; Juan P. Hernandez-Ortiz; Karl A Ciuderos; Katherine Laiton-Donato; Laura Silvana Perez; Lina M. Hurtado; Marcela Mercado-Reyes; María Angélica Maya; María Stella López; Rita Almanza Payares; Sandra Ines Cano; Simón Villegas Velásquez                                                   |                                                                                                                                                                                                                                                                                                                                                                                                                                                       |
| EPI_ISL_2339856, EPI_ISL_2339857, EPI_ISL_2339858, EPI_ISL_2339859, EPI_ISL_2339860, EPI_ISL_2339861, EPI_ISL_2339862, EPI_ISL_2339863, EPI_ISL_2339864, EPI_ISL_2339865, EPI_ISL_2339866, EPI_ISL_2339867, EPI_ISL_2339868, EPI_ISL_2339869, EPI_ISL_2339870, EPI_ISL_2339871, EPI_ISL_2339872, EPI_ISL_2339873, EPI_ISL_2339874, EPI_ISL_2339875, EPI_ISL_2603127, EPI_ISL_2603128, EPI_ISL_2603129, EPI_ISL_2603130                                                                                                                                                                                                                                                                                                                                                                                                                                                                                                                                                                                                                                                                                                                                                                                                                                                                                                                                                                                                                                                                                                                                                                                                                                                                                                                                                                                                                                                                                                                       | see above | Universidad de Cordoba, Montería, Colombia                                                                      | Centro de Investigaciones en Microbiología y Biotecnología-UR (CIMBIUR), Facultad de Ciencias Naturales, Universidad del Rosario, Bogotá, Colombia | Ader Alemán; Alejandra Garcia; Alfonso Calderón; Andrés Díaz; Bertha Gastelbondo; Camilo Guzmán; Cathy Martínez; Evelin Garay; Germán Arrieta; Hector Contreras; Hector Serrano; Jorge Miranda; José Berrocal; Juan David Ramirez; Ketty Galeano; Luz H. Patiño; María Auxiliadora Badillo; Marina Muñoz; Natalia Ballesteros; Ricardo RIVERA; Salim Mattar; Sergio Castañeda; Veronica Contreras; Yesica Botero; Yesica Lopez                                                                          |                                                                                                                                                                                                                                                                                                                                                                                                                                                       |
| EPI_ISL_1220045                                                                                                                                                                                                                                                                                                                                                                                                                                                                                                                                                                                                                                                                                                                                                                                                                                                                                                                                                                                                                                                                                                                                                                                                                                                                                                                                                                                                                                                                                                                                                                                                                                                                                                                                                                                                                                                                                                                              |           | Universidad de Magdalena                                                                                        | Instituto Nacional de Salud- Dirección de Investigación en Salud Pública                                                                           | Carlos Franco-Muñoz; Diego A. Álvarez-Díaz; Diego Andrés Prada; Gerardo Santamaría; Hector Alejandro Ruiz-Moreno; Jhonnatan Reales-González; Julian Naizaque; Katherine Laiton-Donato; Magdalena Wiesner; Marcela Mercado-Reyes.; María T. Herrera-Sepúlveda; Martha Lucia Ospina Martínez; Sheryll Corchuelo                                                                                                                                                                                           |                                                                                                                                                                                                                                                                                                                                                                                                                                                       |
| EPI_ISL_3671010, EPI_ISL_3671024, EPI_ISL_3671025, EPI_ISL_3671044, EPI_ISL_3671045, EPI_ISL_3671047, EPI_ISL_3671059                                                                                                                                                                                                                                                                                                                                                                                                                                                                                                                                                                                                                                                                                                                                                                                                                                                                                                                                                                                                                                                                                                                                                                                                                                                                                                                                                                                                                                                                                                                                                                                                                                                                                                                                                                                                                        | see above | Universidad de Sucre                                                                                            | Universidad Nacional de Colombia - Laboratorio Genómico One Health                                                                                 | Andres F. Cardona-Rios; Carlos Franco-Muñoz; Carolina Muñoz-Arango; Celency Ortiz; Daniel O. Maldonado-Perez; Diego A. Álvarez-Díaz; Hector Alejandro Ruiz-Moreno; Idabely Betancur Ortiz; Jorge E. Osorio; Juan P. Hernandez-Ortiz; Karl A Ciuderos; Katherine Laiton-Donato; Laura Silvana Perez; Lina M. Hurtado; Marcela Mercado-Reyes; María Angélica Maya; María Stella López; Rita Almanza Payares; Sandra Ines Cano; Simón Villegas Velásquez                                                   |                                                                                                                                                                                                                                                                                                                                                                                                                                                       |
| EPI_ISL_1582993, EPI_ISL_1582992, EPI_ISL_1582991, EPI_ISL_1582994                                                                                                                                                                                                                                                                                                                                                                                                                                                                                                                                                                                                                                                                                                                                                                                                                                                                                                                                                                                                                                                                                                                                                                                                                                                                                                                                                                                                                                                                                                                                                                                                                                                                                                                                                                                                                                                                           |           | Universidad del Atlántico Laboratorio de Investigación en Biología Molecular                                    | Instituto Nacional de Salud- Dirección de Investigación en Salud Pública                                                                           | Carlos Franco-Muñoz; Carmen Osorio; Diana Malo; Diego A. Álvarez-Díaz; Diego Andrés Prada; Gerardo Santamaría; Hector Alejandro Ruiz-Moreno; Jhonnatan Reales-González; Juan Camilo Martínez; Julian Naizaque; Katherine Laiton-Donato; Lisseth Pardo; Magdalena Wiesner; Marcela Mercado-Reyes; María T. Herrera-Sepúlveda; Marta Lopez Blanco; Martha Lucia Ospina Martínez; Paola Rojas; Sergio Gomez; Sheryll Corchuelo; Ángela Alarcon Cruz                                                        |                                                                                                                                                                                                                                                                                                                                                                                                                                                       |
| EPI_ISL_3998105, EPI_ISL_3998111, EPI_ISL_3998122, EPI_ISL_3998124, EPI_ISL_3998127, EPI_ISL_3998140, EPI_ISL_3998144, EPI_ISL_3998146, EPI_ISL_3998154, EPI_ISL_3998155                                                                                                                                                                                                                                                                                                                                                                                                                                                                                                                                                                                                                                                                                                                                                                                                                                                                                                                                                                                                                                                                                                                                                                                                                                                                                                                                                                                                                                                                                                                                                                                                                                                                                                                                                                     | see above | Universidad del Atlántico Laboratorio de Investigación en Biología Molecular                                    | Laboratorio de Biología Molecular, Universidad Cooperativa de Colombia, Santa Marta                                                                | Andrew S. Muñoz-Gamba; Daniel B. Ramírez-Osorio; José A. Usme-Ciró; Paula A. Quintero-Cortés; Roberto Garcia                                                                                                                                                                                                                                                                                                                                                                                            |                                                                                                                                                                                                                                                                                                                                                                                                                                                       |
| EPI_ISL_1424054, EPI_ISL_1424055, EPI_ISL_1424056                                                                                                                                                                                                                                                                                                                                                                                                                                                                                                                                                                                                                                                                                                                                                                                                                                                                                                                                                                                                                                                                                                                                                                                                                                                                                                                                                                                                                                                                                                                                                                                                                                                                                                                                                                                                                                                                                            |           | Universidad del Magdalena                                                                                       | Instituto Nacional de Salud- Dirección de Investigación en Salud Pública                                                                           | Carlos Franco-Muñoz; Diego A. Álvarez-Díaz; Diego Andrés Prada; Gerardo Santamaría; Hector Alejandro Ruiz-Moreno; Jhonnatan Reales-González; Julian Naizaque; Katherine Laiton-Donato; Magdalena Wiesner; Marcela Mercado-Reyes.; María T. Herrera-Sepúlveda; Martha Lucia Ospina Martínez; Sheryll Corchuelo                                                                                                                                                                                           |                                                                                                                                                                                                                                                                                                                                                                                                                                                       |
| EPI_ISL_3320720, EPI_ISL_3320725, EPI_ISL_3320743, EPI_ISL_3320748, EPI_ISL_3320752                                                                                                                                                                                                                                                                                                                                                                                                                                                                                                                                                                                                                                                                                                                                                                                                                                                                                                                                                                                                                                                                                                                                                                                                                                                                                                                                                                                                                                                                                                                                                                                                                                                                                                                                                                                                                                                          |           | Universidad del Quindío                                                                                         | Instituto Nacional de Salud                                                                                                                        | Carlos Franco-Muñoz; Carmen Osorio; Diana Malo; Diego A. Álvarez-Díaz; Diego Andrés Prada; Gerardo Santamaría; Hector Alejandro Ruiz-Moreno; Jhonnatan Reales-González; Jorge Rivera; Juan Camilo Martínez; Julian Naizaque; Katherine Laiton-Donato; Lisseth Pardo; Magdalena Wiesner; Marcela Mercado-Reyes; María T. Herrera-Sepúlveda; Marta Lopez Blanco; Martha Lucia Ospina Martínez; Paola Rojas; Sergio Gomez; Sheryll Corchuelo; Ángela Alarcon Cruz                                          |                                                                                                                                                                                                                                                                                                                                                                                                                                                       |
| EPI_ISL_4205667, EPI_ISL_4205668, EPI_ISL_4205669, EPI_ISL_4205670, EPI_ISL_4205671, EPI_ISL_4205672, EPI_ISL_4205673, EPI_ISL_4205674, EPI_ISL_4205675, EPI_ISL_4205676, EPI_ISL_4205677, EPI_ISL_4205678, EPI_ISL_4205679, EPI_ISL_4205680, EPI_ISL_4205681, EPI_ISL_4205682, EPI_ISL_4205683, EPI_ISL_4254657, EPI_ISL_4254658                                                                                                                                                                                                                                                                                                                                                                                                                                                                                                                                                                                                                                                                                                                                                                                                                                                                                                                                                                                                                                                                                                                                                                                                                                                                                                                                                                                                                                                                                                                                                                                                            | see above | Universidad del Rosario                                                                                         | Gencell Pharma                                                                                                                                     | Diego Andrés Otero-Rodríguez; Fabio Andrés Zapata-Gómez; Henry Mauricio Chaparro-Solano; Juan Mauricio Pardo-Oviedo; Jubby Marcela Gálvez-Bermúdez; Ludwig Luis Antonio Albornoz; Nicolás Molano-González; Ángela María Pinzón-Rondón; Ángela María Ruiz-Stemberg                                                                                                                                                                                                                                       |                                                                                                                                                                                                                                                                                                                                                                                                                                                       |
| EPI_ISL_445219                                                                                                                                                                                                                                                                                                                                                                                                                                                                                                                                                                                                                                                                                                                                                                                                                                                                                                                                                                                                                                                                                                                                                                                                                                                                                                                                                                                                                                                                                                                                                                                                                                                                                                                                                                                                                                                                                                                               |           | Universidad del Valle, Laboratorio de Microbiología, VIREM                                                      | Universidad del Valle, Universidad Nacional de Colombia-Sede Palmira, International Center for Tropical Agriculture                                | Beatriz Parra; Diana López-Alvarez; Wilmer J. Cuellar                                                                                                                                                                                                                                                                                                                                                                                                                                                   |                                                                                                                                                                                                                                                                                                                                                                                                                                                       |
| EPI_ISL_3898951, EPI_ISL_3898953, EPI_ISL_3898955, EPI_ISL_3914566, EPI_ISL_3914567, EPI_ISL_3914568, EPI_ISL_3914569, EPI_ISL_3914570, EPI_ISL_3914571, EPI_ISL_3914572, EPI_ISL_3914573, EPI_ISL_3914574, EPI_ISL_3914575, EPI_ISL_3914576, EPI_ISL_3914577, EPI_ISL_3914578, EPI_ISL_3914579, EPI_ISL_3914580, EPI_ISL_3914581, EPI_ISL_3914582, EPI_ISL_3914583, EPI_ISL_3914584, EPI_ISL_3914585, EPI_ISL_3914586, EPI_ISL_3914587, EPI_ISL_3914588, EPI_ISL_3914589, EPI_ISL_3914590, EPI_ISL_3914591, EPI_ISL_3914592, EPI_ISL_3914593, EPI_ISL_3914594, EPI_ISL_3914595, EPI_ISL_3914596, EPI_ISL_3914597, EPI_ISL_3914598, EPI_ISL_3914599, EPI_ISL_3914600, EPI_ISL_3914601, EPI_ISL_3914602, EPI_ISL_3914603, EPI_ISL_3914604, EPI_ISL_3914605, EPI_ISL_3914606, EPI_ISL_3914607, EPI_ISL_3914608, EPI_ISL_3914609, EPI_ISL_3914610, EPI_ISL_3914611, EPI_ISL_3914612, EPI_ISL_3914613, EPI_ISL_3914614, EPI_ISL_3914615, EPI_ISL_3914616, EPI_ISL_3914617, EPI_ISL_3914618, EPI_ISL_3914619, EPI_ISL_3914620, EPI_ISL_3914621, EPI_ISL_3914622, EPI_ISL_3914623, EPI_ISL_3914624, EPI_ISL_3914625, EPI_ISL_3914626, EPI_ISL_3914627, EPI_ISL_3914628, EPI_ISL_3914629, EPI_ISL_4419134, EPI_ISL_4419135, EPI_ISL_4419136, EPI_ISL_4419137, EPI_ISL_4419138, EPI_ISL_4419139, EPI_ISL_4419140, EPI_ISL_4419141, EPI_ISL_4419142, EPI_ISL_4419143, EPI_ISL_4419144, EPI_ISL_4419145, EPI_ISL_4419146, EPI_ISL_4419147, EPI_ISL_4419148, EPI_ISL_4419149, EPI_ISL_4419150, EPI_ISL_4419151, EPI_ISL_4419152, EPI_ISL_4419153, EPI_ISL_4419154, EPI_ISL_4419155, EPI_ISL_4419156, EPI_ISL_4419157, EPI_ISL_4419158, EPI_ISL_4419159, EPI_ISL_4419160, EPI_ISL_4419161, EPI_ISL_4419162, EPI_ISL_4419163, EPI_ISL_4419164, EPI_ISL_4419165, EPI_ISL_4419166, EPI_ISL_4419167, EPI_ISL_4419168, EPI_ISL_4419169, EPI_ISL_4419170, EPI_ISL_4419171, EPI_ISL_4419172, EPI_ISL_4419173, EPI_ISL_4419174, EPI_ISL_4419175, EPI_ISL_4419184 | see above | Universidad del Valle, LDAB-Laboratorio de Diagnostico de Agentes Biologicos                                    | Universidad del Valle                                                                                                                              | Programa Nacional de Caracterización Genómica de SARS-CoV-2                                                                                                                                                                                                                                                                                                                                                                                                                                             |                                                                                                                                                                                                                                                                                                                                                                                                                                                       |
| EPI_ISL_3216903, EPI_ISL_3216904, EPI_ISL_3216905, EPI_ISL_3216906, EPI_ISL_3216907, EPI_ISL_3216908, EPI_ISL_3216909, EPI_ISL_3216910, EPI_ISL_3216911, EPI_ISL_3477562, EPI_ISL_3477563, EPI_ISL_3477564, EPI_ISL_3477565, EPI_ISL_3477566, EPI_ISL_3477567, EPI_ISL_3477568, EPI_ISL_3477569, EPI_ISL_3477570, EPI_ISL_3477571, EPI_ISL_3477572, EPI_ISL_3477573                                                                                                                                                                                                                                                                                                                                                                                                                                                                                                                                                                                                                                                                                                                                                                                                                                                                                                                                                                                                                                                                                                                                                                                                                                                                                                                                                                                                                                                                                                                                                                          | see above | Universidad del Valle, LDAB-Laboratorio de Diagnostico de Agentes Biologicos                                    | Universidad del Valle, TAO-Lab, VIREM, NEAS Network                                                                                                | Andres Castillo; Beatriz Parra & COVID-19 Team Univalle; Diana López-Alvarez; Nelson Rivera Franco                                                                                                                                                                                                                                                                                                                                                                                                      |                                                                                                                                                                                                                                                                                                                                                                                                                                                       |
| EPI_ISL_3398821, EPI_ISL_3398822, EPI_ISL_3398823                                                                                                                                                                                                                                                                                                                                                                                                                                                                                                                                                                                                                                                                                                                                                                                                                                                                                                                                                                                                                                                                                                                                                                                                                                                                                                                                                                                                                                                                                                                                                                                                                                                                                                                                                                                                                                                                                            |           | VIROLOGIA INS DRSP                                                                                              | Instituto Nacional de Salud                                                                                                                        | Carlos Franco-Muñoz; Carmen Osorio; Diana Malo; Diego A. Álvarez-Díaz; Diego Andrés Prada; Gerardo Santamaría; Hector Alejandro Ruiz-Moreno; Jhonnatan Reales-González; Jorge Rivera; Juan Camilo Martínez; Julian Naizaque; Katherine Laiton-Donato; Lisseth Pardo; Magdalena Wiesner; Marcela Mercado-Reyes; María T. Herrera-Sepúlveda; Marta Lopez Blanco; Martha Lucia Ospina Martínez; Paola Rojas; Sergio Gomez; Sheryll Corchuelo; Ángela Alarcon Cruz                                          |                                                                                                                                                                                                                                                                                                                                                                                                                                                       |
| EPI_ISL_1652046, EPI_ISL_1652047, EPI_ISL_1652048, EPI_ISL_1820937, EPI_ISL_1820944, EPI_ISL_1820945, EPI_ISL_1820947, EPI_ISL_1820949, EPI_ISL_1820955, EPI_ISL_2674281                                                                                                                                                                                                                                                                                                                                                                                                                                                                                                                                                                                                                                                                                                                                                                                                                                                                                                                                                                                                                                                                                                                                                                                                                                                                                                                                                                                                                                                                                                                                                                                                                                                                                                                                                                     | see above | VIROLOGIA INS DRSP                                                                                              | Instituto Nacional de Salud- Dirección de Investigación en Salud Pública                                                                           | Carlos Franco-Muñoz; Carmen Osorio; Christian Romero; Diana Malo; Diego A. Álvarez-Díaz; Diego Andrés Prada; Gerardo Santamaría; Hector Alejandro Ruiz-Moreno; Jhonnatan Reales-González; Jorge Rivera; Juan Camilo Martínez; Julian Naizaque; Katherine Laiton-Donato; Lisseth Pardo; Magdalena Wiesner; Marcela Mercado-Reyes; María T. Herrera-Sepúlveda; Marta Lopez Blanco; Martha Lucia Ospina Martínez; Paola Rojas; Patricia del Portillo; Sergio Gomez; Sheryll Corchuelo; Ángela Alarcon Cruz |                                                                                                                                                                                                                                                                                                                                                                                                                                                       |
| EPI_ISL_445085                                                                                                                                                                                                                                                                                                                                                                                                                                                                                                                                                                                                                                                                                                                                                                                                                                                                                                                                                                                                                                                                                                                                                                                                                                                                                                                                                                                                                                                                                                                                                                                                                                                                                                                                                                                                                                                                                                                               |           | Virology Unit, Agrobiodiversity and Biotechnology Project, CIAT - International Center for Tropical Agriculture | Virology Unit, Agrobiodiversity and Biotechnology Project, CIAT - International Center for Tropical Agriculture                                    | B. and Cuellar; Lopez, D.; Parra; W.J.                                                                                                                                                                                                                                                                                                                                                                                                                                                                  |                                                                                                                                                                                                                                                                                                                                                                                                                                                       |
| EPI_ISL_845620                                                                                                                                                                                                                                                                                                                                                                                                                                                                                                                                                                                                                                                                                                                                                                                                                                                                                                                                                                                                                                                                                                                                                                                                                                                                                                                                                                                                                                                                                                                                                                                                                                                                                                                                                                                                                                                                                                                               |           | compensar calle 63                                                                                              | Instituto Nacional de Salud - Dirección de Investigación en Salud Pública                                                                          | Carlos Franco-Muñoz; Diego A. Álvarez-Díaz; Diego Andrés Prada; Gerardo Santamaría; Jonathan Reales; Julian Naizaque; Katherine Laiton-Donato; Magdalena Wiesner; Marcela Mercado-Reyes; María T. Herrera-Sepúlveda; Martha Lucia Ospina Martínez; Mauricio Pacheco-Montealegre; Paola Muñoz-Laiton; Sheryll Corchuelo                                                                                                                                                                                  |                                                                                                                                                                                                                                                                                                                                                                                                                                                       |
| EPI_ISL_4219529                                                                                                                                                                                                                                                                                                                                                                                                                                                                                                                                                                                                                                                                                                                                                                                                                                                                                                                                                                                                                                                                                                                                                                                                                                                                                                                                                                                                                                                                                                                                                                                                                                                                                                                                                                                                                                                                                                                              |           | lab Christus Sinergia Salud -Clin Farallones                                                                    | Molecular Genetics and Antimicrobial Resistance - UGRA, Universidad El Bosque                                                                      | Catalina Espitia; Jinnethe Reyes; Lorena Diaz; Marcela Mercado; Mauricio Pacheco; Rafael Rios; Valentina Martinez                                                                                                                                                                                                                                                                                                                                                                                       |                                                                                                                                                                                                                                                                                                                                                                                                                                                       |
| EPI_ISL_2657875                                                                                                                                                                                                                                                                                                                                                                                                                                                                                                                                                                                                                                                                                                                                                                                                                                                                                                                                                                                                                                                                                                                                                                                                                                                                                                                                                                                                                                                                                                                                                                                                                                                                                                                                                                                                                                                                                                                              |           | laboratorio de salud publica de cundinamarca                                                                    | Instituto Nacional de Salud- Dirección de Investigación en Salud Pública                                                                           | Carlos Franco-Muñoz; Carmen Osorio; Diana Malo; Diego A. Álvarez-Díaz; Diego Andrés Prada; Gerardo Santamaría; Hector Alejandro Ruiz-Moreno; Jhonnatan Reales-González; Jorge Rivera; Juan Camilo Martínez; Julian Naizaque; Katherine Laiton-Donato; Lisseth Pardo; Magdalena Wiesner; Marcela Mercado-Reyes; María T. Herrera-Sepúlveda; Marta Lopez Blanco; Martha Lucia Ospina Martínez; Paola Rojas; Sergio Gomez; Sheryll Corchuelo; Ángela Alarcon Cruz                                          |                                                                                                                                                                                                                                                                                                                                                                                                                                                       |
| EPI_ISL_1235687                                                                                                                                                                                                                                                                                                                                                                                                                                                                                                                                                                                                                                                                                                                                                                                                                                                                                                                                                                                                                                                                                                                                                                                                                                                                                                                                                                                                                                                                                                                                                                                                                                                                                                                                                                                                                                                                                                                              |           | laboratorio de salud pública (Bogotá)                                                                           | Gencore- Universidad de los Andes                                                                                                                  | Alejandro Gómez; David González; Johana Hernandez Gabriela Delgado; Luisa Sacristán; Marcela Guevara-Suarez; Silvia Restrepo                                                                                                                                                                                                                                                                                                                                                                            |                                                                                                                                                                                                                                                                                                                                                                                                                                                       |
| EPI_ISL_2828054                                                                                                                                                                                                                                                                                                                                                                                                                                                                                                                                                                                                                                                                                                                                                                                                                                                                                                                                                                                                                                                                                                                                                                                                                                                                                                                                                                                                                                                                                                                                                                                                                                                                                                                                                                                                                                                                                                                              |           | laboratorio departamental de salud publica - santander                                                          | Instituto Nacional de Salud- Dirección de Investigación en Salud Pública                                                                           | Carlos Franco-Muñoz; Carmen Osorio; Diana Malo; Diego A. Álvarez-Díaz; Diego Andrés Prada; Gerardo Santamaría; Hector Alejandro Ruiz-Moreno; Jhonnatan Reales-González; Jorge Rivera; Juan Camilo Martínez; Julian Naizaque; Katherine Laiton-Donato; Lisseth Pardo; Magdalena Wiesner; Marcela Mercado-Reyes; María T. Herrera-Sepúlveda; Marta Lopez Blanco; Martha Lucia Ospina Martínez; Paola Rojas; Sergio Gomez; Sheryll Corchuelo; Ángela Alarcon Cruz                                          |                                                                                                                                                                                                                                                                                                                                                                                                                                                       |
