# Supplementary material for: Genomic epidemiology of SARS-CoV-2 variants during the first two years of the pandemic in Colombia
Source: PubMed Central journal article supplement (PMC10344885; doi:10.1038/s43856-023-00328-3), 2023-07-13
Supplement: 43856_2023_328_MOESM4_ESM.pdf [file 43856_2023_328_MOESM4_ESM.pdf]

**Supplementary Data 2.** Access number of the novel SARS-CoV-2 sequences from Colombia included in this genome sequences used in this study, 124 genomes sequenced in this study and 104 downloaded from GISAID in the same time frame as the social protest are highlighted in green

All submitters of data may be contacted directly via [www.gisaid.org](http://www.gisaid.org)

| Virus name                                                           | Accession ID    |
|----------------------------------------------------------------------|-----------------|
| hCoV-19/Colombia/VAC-A149/2021                                       | EPI_ISL_7476675 |
| hCoV-19/Colombia/VAC-A148/2021                                       | EPI_ISL_7476671 |
| hCoV-19/Colombia/VAC-A157/2021   EPI_ISL_2603182   2021-04-05        | EPI_ISL_2603182 |
| hCoV-19/Colombia/VAC-A147/2021   EPI_ISL_2584557   2021-04-05        | EPI_ISL_2584557 |
| hCoV-19/Colombia/VAC-A150/2021   EPI_ISL_2584559   2021-04-05        | EPI_ISL_2584559 |
| hCoV-19/Colombia/VAC-A156/2021   EPI_ISL_2584561   2021-04-05        | EPI_ISL_2584561 |
| hCoV-19/Colombia/VAC-A151/2021   EPI_ISL_2603177   2021-04-05        | EPI_ISL_2603177 |
| hCoV-19/Colombia/VAC-A153/2021   EPI_ISL_2603179   2021-04-05        | EPI_ISL_2603179 |
| hCoV-19/Colombia/VAC-A154/2021   EPI_ISL_2603180   2021-04-05        | EPI_ISL_2603180 |
| hCoV-19/Colombia/VAC-A155/2021   EPI_ISL_2603181   2021-04-05        | EPI_ISL_2603181 |
| hCoV-19/Colombia/VAC-INS-VG-2047/2021   EPI_ISL_2009058   2021-04-08 | EPI_ISL_2009058 |
| hCoV-19/Colombia/VAC-A043/2021   EPI_ISL_2339835   2021-04-09        | EPI_ISL_2339835 |
| hCoV-19/Colombia/VAC-A039/2021   EPI_ISL_2339831   2021-04-09        | EPI_ISL_2339831 |
| hCoV-19/Colombia/VAC-A040/2021   EPI_ISL_2339832   2021-04-09        | EPI_ISL_2339832 |
| hCoV-19/Colombia/VAC-INS-VG-2285/2021   EPI_ISL_2158345   2021-04-09 | EPI_ISL_2158345 |
| hCoV-19/Colombia/VAC-A037/2021   EPI_ISL_2339830   2021-04-09        | EPI_ISL_2339830 |
| hCoV-19/Colombia/VAC-A042/2021   EPI_ISL_2339834   2021-04-09        | EPI_ISL_2339834 |
| hCoV-19/Colombia/VAC-K9/2021                                         | EPI_ISL_7476481 |
| hCoV-19/Colombia/VAC-K8/2021                                         | EPI_ISL_7476530 |
| hCoV-19/Colombia/VAC-A014/2021   EPI_ISL_2339808   2021-04-12        | EPI_ISL_2339808 |
| hCoV-19/Colombia/VAC-A011/2021   EPI_ISL_2339805   2021-04-12        | EPI_ISL_2339805 |
| hCoV-19/Colombia/VAC-A015/2021   EPI_ISL_2339809   2021-04-12        | EPI_ISL_2339809 |
| hCoV-19/Colombia/VAC-A016/2021   EPI_ISL_2339810   2021-04-12        | EPI_ISL_2339810 |
| hCoV-19/Colombia/VAC-INS-VG-2073/2021   EPI_ISL_2009059   2021-04-12 | EPI_ISL_2009059 |
| hCoV-19/Colombia/VAC-INS-VG-2074/2021   EPI_ISL_2155039   2021-04-12 | EPI_ISL_2155039 |
| hCoV-19/Colombia/VAC-A012/2021   EPI_ISL_2339806   2021-04-12        | EPI_ISL_2339806 |
| hCoV-19/Colombia/VAC-A013/2021   EPI_ISL_2339807   2021-04-12        | EPI_ISL_2339807 |
| hCoV-19/Colombia/VAC-A031/2021   EPI_ISL_2339824   2021-04-12        | EPI_ISL_2339824 |
| hCoV-19/Colombia/VAC-A032/2021   EPI_ISL_2339825   2021-04-12        | EPI_ISL_2339825 |
| hCoV-19/Colombia/COV_23933/2021   EPI_ISL_3216903   2021-04-14       | EPI_ISL_3216903 |
| hCoV-19/Colombia/VAC-K4/2021                                         | EPI_ISL_7476195 |
| hCoV-19/Colombia/VAC-K1/2021                                         | EPI_ISL_7476429 |
| hCoV-19/Colombia/VAC-K10/2021                                        | EPI_ISL_7476532 |
| hCoV-19/Colombia/VAC-K11/2021                                        | EPI_ISL_7476776 |
| hCoV-19/Colombia/VAC-K3/2021                                         | EPI_ISL_7476266 |
| hCoV-19/Colombia/VAC-K5/2021                                         | EPI_ISL_7476273 |
| hCoV-19/Colombia/VAC-K6/2021                                         | EPI_ISL_7476401 |
| hCoV-19/Colombia/VAC-K7/2021                                         | EPI_ISL_7476602 |
| hCoV-19/Colombia/VAC-K2/2021                                         | EPI_ISL_7476639 |

|                                                                      |                 |
|----------------------------------------------------------------------|-----------------|
| hCoV-19/Colombia/VAC-K12/2021                                        | EPI_ISL_7476873 |
| hCoV-19/Colombia/VAC-INS-VG-4112/2021   EPI_ISL_3385807   2021-04-24 | EPI_ISL_3385807 |
| hCoV-19/Colombia/VAC-K41/2021                                        | EPI_ISL_7476549 |
| hCoV-19/Colombia/VAC-K18/2021                                        | EPI_ISL_7476877 |
| hCoV-19/Colombia/VAC-K19/2021                                        | EPI_ISL_7476887 |
| hCoV-19/Colombia/VAC-INS-VG-2523/2021   EPI_ISL_2362560   2021-04-26 | EPI_ISL_2362560 |
| hCoV-19/Colombia/VAC-INS-VG-2850/2021   EPI_ISL_2674313   2021-04-26 | EPI_ISL_2674313 |
| hCoV-19/Colombia/VAC-INS-VG-2851/2021   EPI_ISL_2674314   2021-04-26 | EPI_ISL_2674314 |
| hCoV-19/Colombia/VAC-INS-VG-2852/2021   EPI_ISL_2674315   2021-04-26 | EPI_ISL_2674315 |
| hCoV-19/Colombia/VAC-INS-VG-2853/2021   EPI_ISL_2674316   2021-04-26 | EPI_ISL_2674316 |
| hCoV-19/Colombia/VAC-INS-VG-3526/2021   EPI_ISL_3385815   2021-04-26 | EPI_ISL_3385815 |
| hCoV-19/Colombia/VAC-K17/2021                                        | EPI_ISL_7476457 |
| hCoV-19/Colombia/VAC-K16/2021                                        | EPI_ISL_7476542 |
| hCoV-19/Colombia/VAC-COV_24419/2021   EPI_ISL_3477560   2021-04-28   | EPI_ISL_3477560 |
| hCoV-19/Colombia/VAC-K13/2021                                        | EPI_ISL_7476805 |
| hCoV-19/Colombia/VAC-K20/2021                                        | EPI_ISL_7476335 |
| hCoV-19/Colombia/VAC-K22/2021                                        | EPI_ISL_7476461 |
| hCoV-19/Colombia/VAC-K21/2021                                        | EPI_ISL_7476741 |
| hCoV-19/Colombia/VAC-K23/2021                                        | EPI_ISL_7476811 |
| hCoV-19/Colombia/VAC-K24/2021                                        | EPI_ISL_7476815 |
| hCoV-19/Colombia/COV_24547/2021   EPI_ISL_3216904   2021-05-06       | EPI_ISL_3216904 |
| hCoV-19/Colombia/VAC-COV_24539/2021   EPI_ISL_3477561   2021-05-06   | EPI_ISL_3477561 |
| hCoV-19/Colombia/VAC-INS-VG-4111/2021   EPI_ISL_3385834   2021-05-07 | EPI_ISL_3385834 |
| hCoV-19/Colombia/VAC-K29/2021                                        | EPI_ISL_7476525 |
| hCoV-19/Colombia/VAC-K32/2021                                        | EPI_ISL_7476656 |
| hCoV-19/Colombia/VAC-K30/2021                                        | EPI_ISL_7476697 |
| hCoV-19/Colombia/VAC-K31/2021                                        | EPI_ISL_7476704 |
| hCoV-19/Colombia/VAC-K33/2021                                        | EPI_ISL_7476711 |
| hCoV-19/Colombia/VAC-K34/2021                                        | EPI_ISL_7476717 |
| hCoV-19/Colombia/VAC-K25/2021                                        | EPI_ISL_7476823 |
| hCoV-19/Colombia/VAC-K26/2021                                        | EPI_ISL_7476833 |
| hCoV-19/Colombia/VAC-K28/2021                                        | EPI_ISL_7476843 |
| hCoV-19/Colombia/VAC-K27/2021                                        | EPI_ISL_7476836 |
| hCoV-19/Colombia/VAC-COV_24589/2021   EPI_ISL_3477562   2021-05-10   | EPI_ISL_3477562 |
| hCoV-19/Colombia/COV_24623/2021   EPI_ISL_3216905   2021-05-11       | EPI_ISL_3216905 |
| hCoV-19/Colombia/COV_24635/2021   EPI_ISL_3216906   2021-05-11       | EPI_ISL_3216906 |
| hCoV-19/Colombia/COV_24656/2021   EPI_ISL_3216907   2021-05-13       | EPI_ISL_3216907 |
| hCoV-19/Colombia/VAC-COV_24670/2021   EPI_ISL_3477563   2021-05-13   | EPI_ISL_3477563 |
| hCoV-19/Colombia/VAC-K43/2021                                        | EPI_ISL_7476423 |
| hCoV-19/Colombia/VAC-K47/2021                                        | EPI_ISL_7476562 |
| hCoV-19/Colombia/VAC-K44/2021                                        | EPI_ISL_7476582 |
| hCoV-19/Colombia/VAC-K35/2021                                        | EPI_ISL_7476846 |
| hCoV-19/Colombia/VAC-K36/2021                                        | EPI_ISL_7476853 |
| hCoV-19/Colombia/VAC-K37/2021                                        | EPI_ISL_7476860 |
| hCoV-19/Colombia/COV_24770/2021   EPI_ISL_3216908   2021-05-19       | EPI_ISL_3216908 |
| hCoV-19/Colombia/VAC-COV_24759/2021   EPI_ISL_3477565   2021-05-19   | EPI_ISL_3477565 |
| hCoV-19/Colombia/VAC-COV_24796/2021   EPI_ISL_3477566   2021-05-20   | EPI_ISL_3477566 |

|                                                                  |                 |
|------------------------------------------------------------------|-----------------|
| hCoV-19/Colombia/VAC-K45/2021                                    | EPI_ISL_7476326 |
| hCoV-19/Colombia/VAC-K46/2021                                    | EPI_ISL_7476345 |
| hCoV-19/Colombia/VAC-K42/2021                                    | EPI_ISL_7476627 |
| hCoV-19/Colombia/VAC-K51/2021                                    | EPI_ISL_7476480 |
| hCoV-19/Colombia/VAC-COV_24846/2021 EPI_ISL_3477567 2021-05-24   | EPI_ISL_3477567 |
| hCoV-19/Colombia/VAC-COV_24867/2021 EPI_ISL_3477568 2021-05-24   | EPI_ISL_3477568 |
| hCoV-19/Colombia/VAC-K52/2021                                    | EPI_ISL_7476288 |
| hCoV-19/Colombia/COV_24923/2021 EPI_ISL_3216909 2021-05-26       | EPI_ISL_3216909 |
| hCoV-19/Colombia/VAC-INS-VG-4113/2021 EPI_ISL_3385787 2021-05-26 | EPI_ISL_3385787 |
| hCoV-19/Colombia/VAC-K58/2021                                    | EPI_ISL_7476244 |
| hCoV-19/Colombia/VAC-K53/2021                                    | EPI_ISL_7476285 |
| hCoV-19/Colombia/VAC-K49/2021                                    | EPI_ISL_7476302 |
| hCoV-19/Colombia/VAC-K57/2021                                    | EPI_ISL_7476365 |
| hCoV-19/Colombia/VAC-K55/2021                                    | EPI_ISL_7476408 |
| hCoV-19/Colombia/VAC-K54/2021                                    | EPI_ISL_7476482 |
| hCoV-19/Colombia/VAC-K50/2021                                    | EPI_ISL_7476680 |
| hCoV-19/Colombia/VAC-K56/2021                                    | EPI_ISL_7476796 |
| hCoV-19/Colombia/VAC-K65/2021                                    | EPI_ISL_7476591 |
| hCoV-19/Colombia/VAC-K60/2021                                    | EPI_ISL_7476282 |
| hCoV-19/Colombia/VAC-K68/2021                                    | EPI_ISL_7476635 |
| hCoV-19/Colombia/VAC-COV_25057/2021 EPI_ISL_3477569 2021-06-02   | EPI_ISL_3477569 |
| hCoV-19/Colombia/VAC-COV_25067/2021 EPI_ISL_3477570 2021-06-02   | EPI_ISL_3477570 |
| hCoV-19/Colombia/VAC-K62/2021                                    | EPI_ISL_7476181 |
| hCoV-19/Colombia/VAC-K61/2021                                    | EPI_ISL_7476340 |
| hCoV-19/Colombia/VAC-K63/2021                                    | EPI_ISL_7476357 |
| hCoV-19/Colombia/VAC-K59/2021                                    | EPI_ISL_7476556 |
| hCoV-19/Colombia/VAC-K66/2021                                    | EPI_ISL_7476597 |
| hCoV-19/Colombia/VAC-K67/2021                                    | EPI_ISL_7476646 |
| hCoV-19/Colombia/VAC-K64/2021                                    | EPI_ISL_7476651 |
| hCoV-19/Colombia/VAC-COV-VG-3805/2021 EPI_ISL_2834726 2021-06-04 | EPI_ISL_2834726 |
| hCoV-19/Colombia/VAC-K73/2021                                    | EPI_ISL_7476218 |
| hCoV-19/Colombia/VAC-K70/2021                                    | EPI_ISL_7476351 |
| hCoV-19/Colombia/VAC-K72/2021                                    | EPI_ISL_7476417 |
| hCoV-19/Colombia/VAC-K74/2021                                    | EPI_ISL_7476228 |
| hCoV-19/Colombia/VAC-K76/2021                                    | EPI_ISL_7476237 |
| hCoV-19/Colombia/VAC-K75/2021                                    | EPI_ISL_7476536 |
| hCoV-19/Colombia/VAC-INS-VG-1916/2021 EPI_ISL_3385820 2021-06-10 | EPI_ISL_3385820 |
| hCoV-19/Colombia/VAC-K69/2021                                    | EPI_ISL_7476585 |
| hCoV-19/Colombia/VAC-K71/2021                                    | EPI_ISL_7476615 |
| hCoV-19/Colombia/VAC-K77/2021                                    | EPI_ISL_7476622 |
| hCoV-19/Colombia/VAC-INS-VG-4114/2021 EPI_ISL_3385808 2021-06-12 | EPI_ISL_3385808 |
| hCoV-19/Colombia/VAC-INS-VG-4115/2021 EPI_ISL_3385849 2021-06-12 | EPI_ISL_3385849 |
| hCoV-19/Colombia/VAC-K88/2021                                    | EPI_ISL_7476308 |
| hCoV-19/Colombia/VAC-K85/2021                                    | EPI_ISL_7476319 |
| hCoV-19/Colombia/VAC-K80/2021                                    | EPI_ISL_7476368 |
| hCoV-19/Colombia/VAC-K87/2021                                    | EPI_ISL_7476771 |
| hCoV-19/Colombia/VAC-K81/2021                                    | EPI_ISL_7476380 |

|                                                                  |                 |
|------------------------------------------------------------------|-----------------|
| hCoV-19/Colombia/VAC-K86/2021                                    | EPI_ISL_7476395 |
| hCoV-19/Colombia/VAC-K84/2021                                    | EPI_ISL_7476483 |
| hCoV-19/Colombia/VAC-K82/2021                                    | EPI_ISL_7476200 |
| hCoV-19/Colombia/VAC-K79/2021                                    | EPI_ISL_7476391 |
| hCoV-19/Colombia/VAC-K83/2021                                    | EPI_ISL_7476501 |
| hCoV-19/Colombia/VAC-K95/2021                                    | EPI_ISL_7476174 |
| hCoV-19/Colombia/VAC-K97/2021                                    | EPI_ISL_7476300 |
| hCoV-19/Colombia/VAC-K96/2021                                    | EPI_ISL_7476449 |
| hCoV-19/Colombia/VAC-K89/2021                                    | EPI_ISL_7476866 |
| hCoV-19/Colombia/VAC-K94/2021                                    | EPI_ISL_7476900 |
| hCoV-19/Colombia/VAC-K93/2021                                    | EPI_ISL_7476330 |
| hCoV-19/Colombia/VAC-K90/2021                                    | EPI_ISL_7476370 |
| hCoV-19/Colombia/VAC-K98/2021                                    | EPI_ISL_7476376 |
| hCoV-19/Colombia/VAC-K92/2021                                    | EPI_ISL_7476661 |
| hCoV-19/Colombia/VAC-K91/2021                                    | EPI_ISL_7476794 |
| hCoV-19/Colombia/VAC-K106/2021                                   | EPI_ISL_7476491 |
| hCoV-19/Colombia/VAC-K100/2021                                   | EPI_ISL_7476690 |
| hCoV-19/Colombia/VAC-COV_25774/2021 EPI_ISL_3477571 2021-06-28   | EPI_ISL_3477571 |
| hCoV-19/Colombia/VAC-COV_25776/2021 EPI_ISL_3477572 2021-06-28   | EPI_ISL_3477572 |
| hCoV-19/Colombia/VAC-COV_25810/2021 EPI_ISL_3477573 2021-06-28   | EPI_ISL_3477573 |
| hCoV-19/Colombia/COV_25796/2021 EPI_ISL_3216910 2021-06-29       | EPI_ISL_3216910 |
| hCoV-19/Colombia/COV_25875/2021 EPI_ISL_3216911 2021-06-29       | EPI_ISL_3216911 |
| hCoV-19/Colombia/VAC-COV_25884/2021 EPI_ISL_3477564 2021-06-29   | EPI_ISL_3477564 |
| hCoV-19/Colombia/VAC-K104/2021                                   | EPI_ISL_7476259 |
| hCoV-19/Colombia/VAC-K105/2021                                   | EPI_ISL_7476475 |
| hCoV-19/Colombia/VAC-K103/2021                                   | EPI_ISL_7476510 |
| hCoV-19/Colombia/VAC-K107/2021                                   | EPI_ISL_7476523 |
| hCoV-19/Colombia/VAC-K102/2021                                   | EPI_ISL_7476733 |
| hCoV-19/Colombia/VAC-K101/2021                                   | EPI_ISL_7476801 |
| hCoV-19/Colombia/VAC-K99/2021                                    | EPI_ISL_7476894 |
| hCoV-19/Colombia/VAC-UV-20025918/2021 EPI_ISL_4419151 2021-06-30 | EPI_ISL_4419151 |
| hCoV-19/Colombia/VAC-UV-20025921/2021 EPI_ISL_4419152 2021-06-30 | EPI_ISL_4419152 |
| hCoV-19/Colombia/VAC-UV-20025938/2021 EPI_ISL_4419153 2021-06-30 | EPI_ISL_4419153 |
| hCoV-19/Colombia/VAC-UV-20025944/2021 EPI_ISL_4419154 2021-06-30 | EPI_ISL_4419154 |
| hCoV-19/Colombia/VAC-UV-20025962/2021 EPI_ISL_4419155 2021-07-01 | EPI_ISL_4419155 |
| hCoV-19/Colombia/VAC-UV-20025981/2021 EPI_ISL_4419156 2021-07-01 | EPI_ISL_4419156 |
| hCoV-19/Colombia/VAC-K108/2021                                   | EPI_ISL_7476467 |
| hCoV-19/Colombia/CO-UV-26067/2021 EPI_ISL_3914569 2021-07-02     | EPI_ISL_3914569 |
| hCoV-19/Colombia/VAC-SCOV-019/2021 EPI_ISL_3065505 2021-07-03    | EPI_ISL_3065505 |
| hCoV-19/Colombia/VAC-K110/2021                                   | EPI_ISL_7476188 |
| hCoV-19/Colombia/VAC-K116/2021                                   | EPI_ISL_7476442 |
| hCoV-19/Colombia/VAC-K109/2021                                   | EPI_ISL_7476485 |
| hCoV-19/Colombia/VAC-K115/2021                                   | EPI_ISL_7476570 |
| hCoV-19/Colombia/VAC-K113/2021                                   | EPI_ISL_7476610 |
| hCoV-19/Colombia/VAC-K111/2021                                   | EPI_ISL_7476748 |
| hCoV-19/Colombia/VAC-K112/2021                                   | EPI_ISL_7476750 |
| hCoV-19/Colombia/VAC-K114/2021                                   | EPI_ISL_7476758 |

|                                                                       |                 |
|-----------------------------------------------------------------------|-----------------|
| hCoV-19/Colombia/VAC-UV-20026043/2021 EPI_ISL_4419157 2021-07-06      | EPI_ISL_4419157 |
| hCoV-19/Colombia/VAC-UV-20026047/2021 EPI_ISL_4419158 2021-07-06      | EPI_ISL_4419158 |
| hCoV-19/Colombia/CO-UV-26250/2021 EPI_ISL_3914570 2021-07-08          | EPI_ISL_3914570 |
| hCoV-19/Colombia/CO-UV-26254/2021 EPI_ISL_3914571 2021-07-08          | EPI_ISL_3914571 |
| hCoV-19/Colombia/CO-UV-20026301/2021 EPI_ISL_3914566 2021-07-11       | EPI_ISL_3914566 |
| hCoV-19/Colombia/VAC-K126/2021                                        | EPI_ISL_7476314 |
| hCoV-19/Colombia/VAC-K120/2021                                        | EPI_ISL_7476484 |
| hCoV-19/Colombia/VAC-K124/2021                                        | EPI_ISL_7476518 |
| hCoV-19/Colombia/VAC-K117/2021                                        | EPI_ISL_7476687 |
| hCoV-19/Colombia/VAC-K119/2021                                        | EPI_ISL_7476727 |
| hCoV-19/Colombia/VAC-K118/2021                                        | EPI_ISL_7476765 |
| hCoV-19/Colombia/CO-UV-26362/2021 EPI_ISL_3914573 2021-07-13          | EPI_ISL_3914573 |
| hCoV-19/Colombia/VAC-UV-20026390/2021 EPI_ISL_4419159 2021-07-13      | EPI_ISL_4419159 |
| hCoV-19/Colombia/VAC-UV-20026397/2021 EPI_ISL_4419160 2021-07-13      | EPI_ISL_4419160 |
| hCoV-19/Colombia/VAC-UV-20026398/2021 EPI_ISL_4419161 2021-07-13      | EPI_ISL_4419161 |
| hCoV-19/Colombia/VAC-UV-26361/2021 EPI_ISL_4419184 2021-07-13         | EPI_ISL_4419184 |
| hCoV-19/Colombia/CO-UV-20026419/2021 EPI_ISL_3914567 2021-07-14       | EPI_ISL_3914567 |
| hCoV-19/Colombia/CO-UV-26439/2021 EPI_ISL_3914574 2021-07-14          | EPI_ISL_3914574 |
| hCoV-19/Colombia/VAC-UV-20026403/2021 EPI_ISL_4419162 2021-07-14      | EPI_ISL_4419162 |
| hCoV-19/Colombia/VAC-UV-20026423/2021 EPI_ISL_4419163 2021-07-14      | EPI_ISL_4419163 |
| hCoV-19/Colombia/CO-UV-20026422/2021 EPI_ISL_3898951 2021-07-15       | EPI_ISL_3898951 |
| hCoV-19/Colombia/VAC-UNIANDES-G027946/2021 EPI_ISL_4566188 2021-07-16 | EPI_ISL_4566188 |
| hCoV-19/Colombia/VAC-UNIANDES-G027947/2021 EPI_ISL_4566190 2021-07-16 | EPI_ISL_4566190 |
| hCoV-19/Colombia/VAC-UV-20026515/2021 EPI_ISL_4419165 2021-07-17      | EPI_ISL_4419165 |
| hCoV-19/Colombia/CO-UV-26548/2021 EPI_ISL_3914578 2021-07-19          | EPI_ISL_3914578 |
| hCoV-19/Colombia/CO-UV-26561/2021 EPI_ISL_3914576 2021-07-19          | EPI_ISL_3914576 |
| hCoV-19/Colombia/VAC-UV-20026511/2021 EPI_ISL_4419164 2021-07-19      | EPI_ISL_4419164 |
| hCoV-19/Colombia/VAC-UV-20026546/2021 EPI_ISL_4419166 2021-07-19      | EPI_ISL_4419166 |
| hCoV-19/Colombia/VAC-UV-20026550/2021 EPI_ISL_4419167 2021-07-19      | EPI_ISL_4419167 |
| hCoV-19/Colombia/VAC-UV-20026567/2021 EPI_ISL_4419168 2021-07-20      | EPI_ISL_4419168 |
| hCoV-19/Colombia/VAC-UV-20026612/2021 EPI_ISL_4419170 2021-07-21      | EPI_ISL_4419170 |
| hCoV-19/Colombia/VAC-UV-20026620/2021 EPI_ISL_4419171 2021-07-21      | EPI_ISL_4419171 |
| hCoV-19/Colombia/VAC-UV-20026634/2021 EPI_ISL_4419172 2021-07-21      | EPI_ISL_4419172 |
| hCoV-19/Colombia/VAC-K128/2021                                        | EPI_ISL_7476210 |
| hCoV-19/Colombia/VAC-K133/2021                                        | EPI_ISL_7476437 |
| hCoV-19/Colombia/VAC-K127/2021                                        | EPI_ISL_7476784 |
| hCoV-19/Colombia/VAC-K129/2021                                        | EPI_ISL_7476790 |
| hCoV-19/Colombia/VAC-UV-20026671/2021 EPI_ISL_4419173 2021-07-23      | EPI_ISL_4419173 |
| hCoV-19/Colombia/CO-UV-26723/2021 EPI_ISL_3914579 2021-07-26          | EPI_ISL_3914579 |
| hCoV-19/Colombia/CO-UV-26747/2021 EPI_ISL_3914581 2021-07-26          | EPI_ISL_3914581 |
| hCoV-19/Colombia/CO-UV-26748/2021 EPI_ISL_3941427 2021-07-26          | EPI_ISL_3941427 |
| hCoV-19/Colombia/VAC-UV-20026750/2021 EPI_ISL_4419174 2021-07-26      | EPI_ISL_4419174 |
| hCoV-19/Colombia/VAC-K38/2021                                         | EPI_ISL_7476253 |
| hCoV-19/Colombia/VAC-K135/2021                                        | EPI_ISL_7476293 |
| hCoV-19/Colombia/VAC-K134/2021                                        | EPI_ISL_7476576 |
| hCoV-19/Colombia/CO-UV-26847/2021 EPI_ISL_3914582 2021-07-29          | EPI_ISL_3914582 |
| hCoV-19/Colombia/VAC-UV-20026844/2021 EPI_ISL_4419175 2021-07-29      | EPI_ISL_4419175 |





|            |                                                  |
|------------|--------------------------------------------------|
| 2021-04-23 | Sequenced for the study                          |
| 2021-04-24 | Downloaded from GISAID                           |
| 2021-04-26 | Sequenced for the study                          |
| 2021-04-26 | Sequenced for the study                          |
| 2021-04-26 | Sequenced for the study                          |
| 2021-04-26 | Downloaded from GISAID                           |
| 2021-04-26 | Downloaded from GISAID                           |
| 2021-04-26 | Downloaded from GISAID                           |
| 2021-04-26 | Downloaded from GISAID                           |
| 2021-04-26 | Downloaded from GISAID                           |
| 2021-04-26 | Downloaded from GISAID                           |
| 2021-04-28 | Sequenced for the study                          |
| 2021-04-28 | Sequenced for the study                          |
| 2021-04-28 | Downloaded from GISAID                           |
| 2021-05-01 | Sequenced for the study                          |
| 2021-05-04 | Sequenced for the study                          |
| 2021-05-04 | Sequenced for the study                          |
| 2021-05-04 | Sequenced for the study                          |
| 2021-05-04 | Sequenced for the study                          |
| 2021-05-04 | Sequenced for the study                          |
| 2021-05-06 | Downloaded from GISAID                           |
| 2021-05-06 | Downloaded from GISAID                           |
| 2021-05-07 | Downloaded from GISAID                           |
| 2021-05-10 | <input type="checkbox"/> Sequenced for the study |
| 2021-05-10 | Sequenced for the study                          |
| 2021-05-10 | Sequenced for the study                          |
| 2021-05-10 | Sequenced for the study                          |
| 2021-05-10 | Sequenced for the study                          |
| 2021-05-10 | Sequenced for the study                          |
| 2021-05-10 | Sequenced for the study                          |
| 2021-05-10 | Sequenced for the study                          |
| 2021-05-10 | Sequenced for the study                          |
| 2021-05-10 | Sequenced for the study                          |
| 2021-05-10 | Sequenced for the study                          |
| 2021-05-10 | Downloaded from GISAID                           |
| 2021-05-11 | Downloaded from GISAID                           |
| 2021-05-11 | Downloaded from GISAID                           |
| 2021-05-13 | Downloaded from GISAID                           |
| 2021-05-13 | Downloaded from GISAID                           |
| 2021-05-18 | Sequenced for the study                          |
| 2021-05-18 | Sequenced for the study                          |
| 2021-05-18 | Sequenced for the study                          |
| 2021-05-18 | Sequenced for the study                          |
| 2021-05-18 | Sequenced for the study                          |
| 2021-05-18 | Sequenced for the study                          |
| 2021-05-19 | Downloaded from GISAID                           |
| 2021-05-19 | Downloaded from GISAID                           |
| 2021-05-20 | Downloaded from GISAID                           |



|            |                         |
|------------|-------------------------|
| 2021-05-21 | Sequenced for the study |
| 2021-05-21 | Sequenced for the study |
| 2021-05-21 | Sequenced for the study |
| 2021-05-24 | Sequenced for the study |
| 2021-05-24 | Downloaded from GISAID  |
| 2021-05-24 | Downloaded from GISAID  |
| 2021-05-26 | Sequenced for the study |
| 2021-05-26 | Downloaded from GISAID  |
| 2021-05-26 | Downloaded from GISAID  |
| 2021-05-29 | Sequenced for the study |
| 2021-05-29 | Sequenced for the study |
| 2021-05-29 | Sequenced for the study |
| 2021-05-29 | Sequenced for the study |
| 2021-05-29 | Sequenced for the study |
| 2021-05-29 | Sequenced for the study |
| 2021-05-29 | Sequenced for the study |
| 2021-05-29 | Sequenced for the study |
| 2021-05-29 | Sequenced for the study |
| 2021-05-31 | Sequenced for the study |
| 2021-06-02 | Sequenced for the study |
| 2021-06-02 | Sequenced for the study |
| 2021-06-02 | Downloaded from GISAID  |
| 2021-06-02 | Downloaded from GISAID  |
| 2021-06-04 | Sequenced for the study |
| 2021-06-04 | Sequenced for the study |
| 2021-06-04 | Sequenced for the study |
| 2021-06-04 | Sequenced for the study |
| 2021-06-04 | Sequenced for the study |
| 2021-06-04 | Sequenced for the study |
| 2021-06-04 | Sequenced for the study |
| 2021-06-04 | Downloaded from GISAID  |
| 2021-06-08 | Sequenced for the study |
| 2021-06-08 | Sequenced for the study |
| 2021-06-08 | Sequenced for the study |
| 2021-06-09 | Sequenced for the study |
| 2021-06-09 | Sequenced for the study |
| 2021-06-09 | Sequenced for the study |
| 2021-06-10 | Downloaded from GISAID  |
| 2021-06-11 | Sequenced for the study |
| 2021-06-11 | Sequenced for the study |
| 2021-06-11 | Sequenced for the study |
| 2021-06-12 | Downloaded from GISAID  |
| 2021-06-12 | Downloaded from GISAID  |
| 2021-06-15 | Sequenced for the study |
| 2021-06-15 | Sequenced for the study |
| 2021-06-15 | Sequenced for the study |
| 2021-06-15 | Sequenced for the study |
| 2021-06-16 | Sequenced for the study |



|            |                         |
|------------|-------------------------|
| 2021-07-06 | Downloaded from GISAID  |
| 2021-07-06 | Downloaded from GISAID  |
| 2021-07-08 | Downloaded from GISAID  |
| 2021-07-08 | Downloaded from GISAID  |
| 2021-07-11 | Downloaded from GISAID  |
| 2021-07-12 | Sequenced for the study |
| 2021-07-12 | Sequenced for the study |
| 2021-07-12 | Sequenced for the study |
| 2021-07-12 | Sequenced for the study |
| 2021-07-12 | Sequenced for the study |
| 2021-07-12 | Sequenced for the study |
| 2021-07-13 | Downloaded from GISAID  |
| 2021-07-13 | Downloaded from GISAID  |
| 2021-07-13 | Downloaded from GISAID  |
| 2021-07-13 | Downloaded from GISAID  |
| 2021-07-13 | Downloaded from GISAID  |
| 2021-07-14 | Downloaded from GISAID  |
| 2021-07-14 | Downloaded from GISAID  |
| 2021-07-14 | Downloaded from GISAID  |
| 2021-07-14 | Downloaded from GISAID  |
| 2021-07-15 | Downloaded from GISAID  |
| 2021-07-16 | Downloaded from GISAID  |
| 2021-07-16 | Downloaded from GISAID  |
| 2021-07-17 | Downloaded from GISAID  |
| 2021-07-19 | Downloaded from GISAID  |
| 2021-07-19 | Downloaded from GISAID  |
| 2021-07-19 | Downloaded from GISAID  |
| 2021-07-19 | Downloaded from GISAID  |
| 2021-07-19 | Downloaded from GISAID  |
| 2021-07-20 | Downloaded from GISAID  |
| 2021-07-21 | Downloaded from GISAID  |
| 2021-07-21 | Downloaded from GISAID  |
| 2021-07-21 | Downloaded from GISAID  |
| 2021-07-22 | Sequenced for the study |
| 2021-07-22 | Sequenced for the study |
| 2021-07-22 | Sequenced for the study |
| 2021-07-22 | Sequenced for the study |
| 2021-07-23 | Downloaded from GISAID  |
| 2021-07-26 | Downloaded from GISAID  |
| 2021-07-26 | Downloaded from GISAID  |
| 2021-07-26 | Downloaded from GISAID  |
| 2021-07-26 | Downloaded from GISAID  |
| 2021-07-28 | Sequenced for the study |
| 2021-07-28 | Sequenced for the study |
| 2021-07-28 | Sequenced for the study |
| 2021-07-29 | Downloaded from GISAID  |
| 2021-07-29 | Downloaded from GISAID  |
